# Supplementary material for: Identification of a Novel Lipase with AHSMG Pentapeptide in Hypocreales and Glomerellales Filamentous Fungi
Source: MDPI journal article supplement (doi:10.3390/ijms23169367), 2022-08-19

2Z5G\_1[Chains  
 [Trichoderma harzianum]\_ThaL  
 [Trichoderma harzianum]\_KKO99473.1  
 [Trichoderma guizhouense]\_OPB43634.1  
 [Trichoderma simmonsii]\_QXS94233.1  
 [Trichoderma lentiforme]\_KAF3077685.1  
 [Trichoderma virens\_FT-333]\_UKZ73321.1  
 [Trichoderma semiorbis]\_KAH0532554.1  
 [Trichoderma asperellum\_CBS\_433.97]\_XP\_0  
 [Trichoderma asperelloides]\_KAH8131048.1  
 [Trichoderma arundinaceum]\_RFU75476.1  
 [Trichoderma gracile]\_KAH0498535.1  
 [Bacillus licheniformis]\_KAC95850.2\_RN2  
 [Trichosporon asahii\_var. asahii]\_AGN981

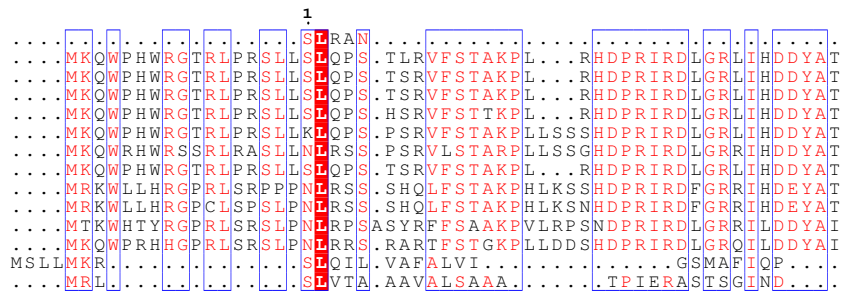

2Z5G\_1[Chains  
[Trichoderma\_harzianum]\_ThaL  
[Trichoderma\_harzianum]\_KKO99473.1  
[Trichoderma\_guizhouense]\_OPB43634.1  
[Trichoderma\_simmonsii]\_QYS94233.1  
[Trichoderma\_lentiforme]\_KAF3077685.1  
[Trichoderma\_virens\_FT-333]\_UKZ773321.1  
[Trichoderma\_semiorbis]\_KAH0532554.1  
[Trichoderma\_asperellum\_CBS\_433\_97]\_XP\_0  
[Trichoderma\_asperelloides]\_KAH8131048.1  
[Trichoderma\_arundinaceum]\_RFU75476.1  
[Trichoderma\_gracile]\_KAH0498535.1  
[Bacillus\_licheniformis]\_CAB95850.2\_RN2  
[Trichosporon\_asahii\_var.\_asahii]\_AGN981

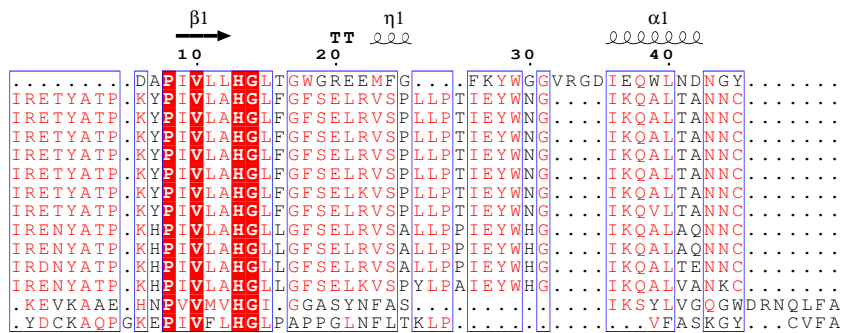

2Z5G\_1[Chains  
[Trichoderma harzianum]\_ThaL  
[Trichoderma harzianum]\_KKO99473.1  
[Trichoderma guizhouense]\_OPB43634.1  
[Trichoderma simmonsii]\_QYS94233.1  
[Trichoderma lentiforme]\_KAF3077685.1  
[Trichoderma virens FT-333]\_UKZ73321.1  
[Trichoderma semiorbis]\_KAH0532554.1  
[Trichoderma asperellum CBS\_433\_97]\_XP\_0  
[Trichoderma asperelloides]\_KAH8131048.1  
[Trichoderma arundinaceum]\_RFU75476.1  
[Trichoderma gracile]\_KAH0498535.1  
[Bacillus licheniformis]\_CAB95850.2\_RN2  
[Trichosporon asahii var. asahii]\_AGN981

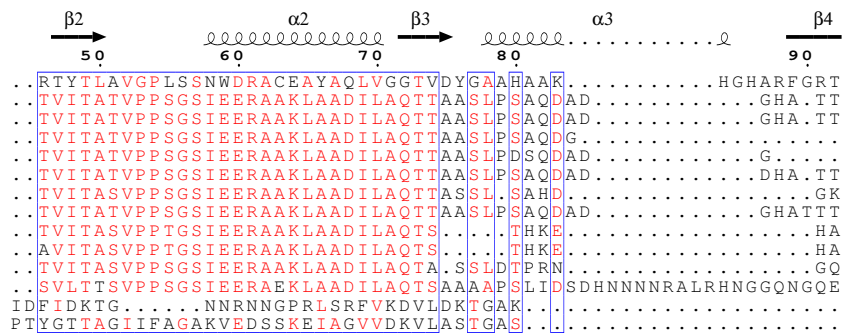

2Z5G\_1[Chains  
[Trichoderma harzianum]\_ThaL  
[Trichoderma harzianum]\_KKO99473.1  
[Trichoderma guizhouense]\_OPB43634.1  
[Trichoderma simmonsii]\_QYS94233.1  
[Trichoderma lentiforme]\_KAF3077685.1  
[Trichoderma virens FT-333]\_UKZ73321.1  
[Trichoderma semiorbis]\_KAH0532554.1  
[Trichoderma asperellum CB3\_437]\_XP\_0  
[Trichoderma asperelloides]\_KAH8131048.1  
[Trichoderma arundinaceum]\_RFU75476.1  
[Trichoderma gracile]\_KAH0498535.1  
[Bacillus licheniformis]\_CAB95850.2\_RN2  
[Trichosporon asahii var. asahii]\_AGN981

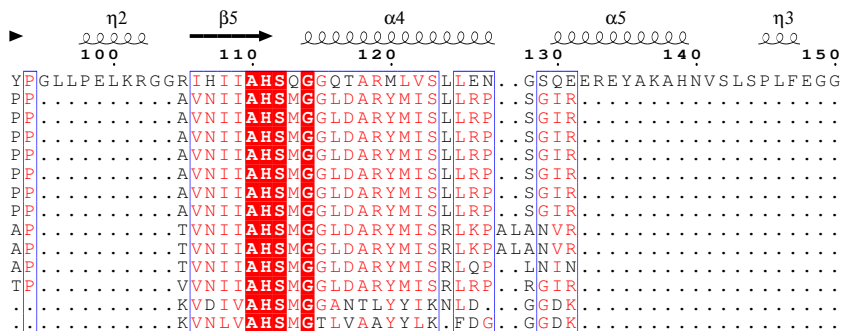

2Z5G\_1|Chains  
[Trichoderma harzianum]\_ThaL  
[Trichoderma harzianum]\_KKO99473.1  
[Trichoderma guizhouense]\_OPB43634.1  
[Trichoderma simmonsii]\_QYS94233.1  
[Trichoderma lentiforme]\_KAF3077685.1  
[Trichoderma virens\_FT-333]\_UKZ73321.1  
[Trichoderma semiorbis]\_KAH0532554.1  
[Trichoderma asperellum\_CBS\_433\_97]\_XP\_0  
[Trichoderma asperelloides]\_KAH8131048.1  
[Trichoderma arundinaceum]\_RFU75476.1  
[Trichoderma gracile]\_KAH0498535.1  
[Bacillus licheniformis]\_CAB95850.2\_RN2  
[Trichosporon asahii\_var. asahii]\_AGN981

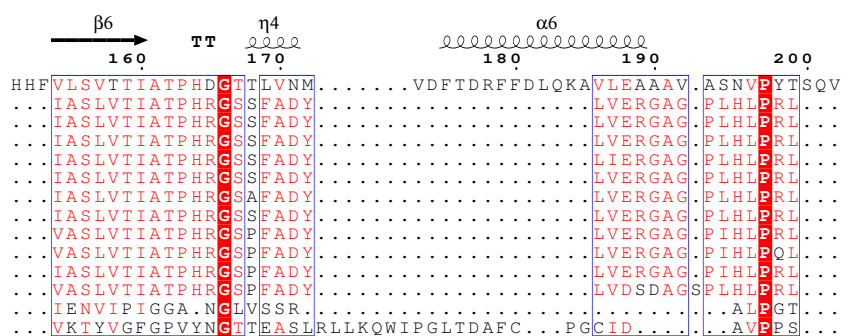

[Trichoderma guzzonense] QYS94233.1  
[Trichoderma lentiforme] KAF3077685.1  
[Trichoderma virens FT-333] UKZ773221.1  
[Trichoderma semiorbis] KAH0532554.1  
[Trichoderma asperellum CBS 433.97] XP\_0  
[Trichoderma asperelloides] KAH8130408.1  
[Trichoderma arundinaceum] RFU75476.1  
[Trichoderma gracile] KAH0498535.1  
[Bacillus licheniformis] CAB95850.2 RN2  
[Trichosporon asahii var. asahii] AGN981

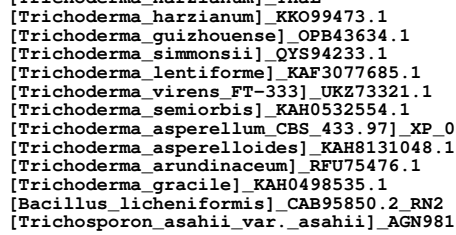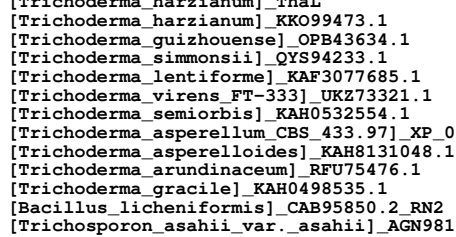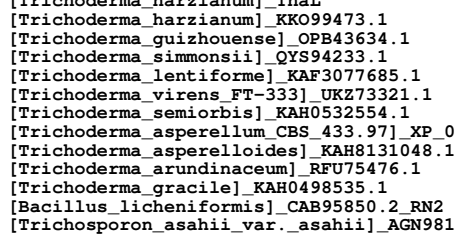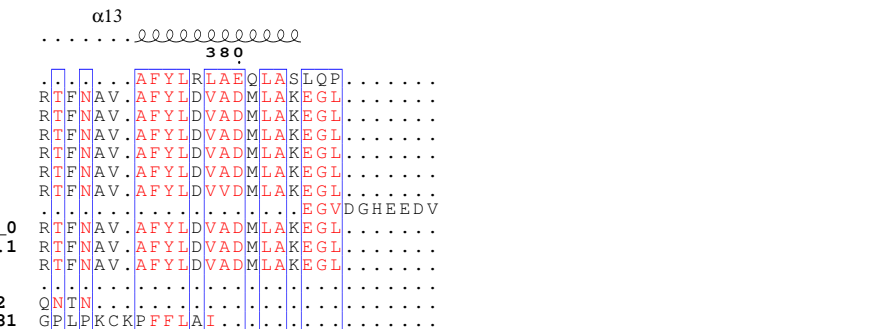

Supplement: s1 [file s1]
