# Supplementary material for: Identification of a Novel Lipase with AHSMG Pentapeptide in Hypocreales and Glomerellales Filamentous Fungi
Source: MDPI journal article supplement (doi:10.3390/ijms23169367), 2022-08-19
Supplement: s1 [file s1]

*ThaL*                      η1                      α1                      TT                      1                      10                      20                      30                      40                      50                      60  
*ThaL*                      MKQWPHWRGTRLPRLSLLSQPS                      TLRVFS                      AKPLRHDPRIIRDLGRLIHDDYATIRETYATP  
*Th\_KKO99473.1*                      MKQWPHWRGTRLPRLSLLSQPS                      TLRVFS                      AKPLRHDPRIIRDLGRLIHDDYATIRETYATP  
*Th\_135964*                      MKQWPHWRGTRLPRLSLLSQPS                      ASRVFS                      TKPLRHDPRIIRDLGRLIHDDYATIRETYATP

*ThaL*                      β1                      TT                      70                      80                      TT                      α2                      η2                      β2                      α3                      90                      100                      110                      120  
*ThaL*                      KYPIVLAHGLFGFSELRVSPLLPTIEYWNGIKQALTANNCTVITATVPPSGSIEERAACL  
*Th\_KKO99473.1*                      KYPIVLAHGLFGFSELRVSPLLPTIEYWNGIKQALTANNCTVITATVPPSGSIEERAACL  
*Th\_135964*                      KYPIVLAHGLFGFSELRVSPLLPTIEYWNGIKQALTANNCTVITATVPPSGSIEERAACL

*ThaL*                      η3                      β3                      α4                      TT                      β4                      130                      140                      150                      160                      170                      180  
*ThaL*                      AADILAQTAAASLPQAQDA                      DGHAT                      T                      PPAVNI                      IAHSMGGLDARYMISLLRPSGI                      R                      IASLVT  
*Th\_KKO99473.1*                      AADILAQTAAASLPQAQDA                      DGHAT                      T                      PPAVNI                      IAHSMGGLDARYMISLLRPSGI                      R                      IASLVT  
*Th\_135964*                      AADILAQTAAASLPQAQDA                      DGHAT                      S                      PPAVNI                      IAHSMGGLDARYMISLLRPSGI                      Q                      IASLVT

*ThaL*                      TT                      α5                      α6                      α7                      α8                      190                      200                      210                      220                      230                      240  
*ThaL*                      IATPHRGSSSFADYLVERGAGPLHLPLRYGVIRRAGLGTSAGQLTTRYMREEFNPRVRDD  
*Th\_KKO99473.1*                      IATPHRGSSSFADYLVERGAGPLHLPLRYGVIRRAGLGTSAGQLTTRYMREEFNPRVRDD  
*Th\_135964*                      IATPHRGSSSFADYLVERGAGPLHLPLRYGVIRRAGLGTSAGQLTTRYMREEFNPRVRDD

*ThaL*                      β5                      α9                      β6                      η4                      TT                      250                      260                      270                      280                      290                      300  
*ThaL*                      EAVRYFSYGAAIDEPSLLGAFRLPHGVVDKREGENDGLVSVKSSRWGVYKGTLMGVSHLD  
*Th\_KKO99473.1*                      EAVRYFSYGAAIDEPSLLGAFRLPHGVVDKREGENDGLVSVKSSRWGVYKGTLMGVSHLD  
*Th\_135964*                      EGVRYFSYGAAIDEPSLLGAFRLPHGVVDKREGENDGLVSVKSSRWGVYKGTLMGVSHLD

*ThaL*                      α10                      α11                      310                      320                      330                      340  
*ThaL*                      LINWSNRARWTVREWMGMRRRTFNAVAFYLDVADMLAKEGL  
*Th\_KKO99473.1*                      LINWSNRARWTVREWMGMRRRTFNAVAFYLDVADMLAKEGL  
*Th\_135964*                      LINWSNRARWTVREWMGMRRRTFNAVAFYLDVADMLAKEGL
