# Supplementary material for: Identification of a Novel Lipase with AHSMG Pentapeptide in Hypocreales and Glomerellales Filamentous Fungi
Source: MDPI journal article supplement (doi:10.3390/ijms23169367), 2022-08-19
Supplement: s1 [file s1]

[Candida albicans]\_ADP21191.1  
[Parastagonospora nodorum SN15]\_XP\_001800960.1  
[Talaromyces cellulolyticus]\_GAM42581.1  
[Fusarium oxysporum]\_ABR12479.1  
[Verticillium dahliae VdLs.17]\_EGY21687.1  
[Melampsora]  
[Cryptococcus gattii]  
[Fusarium vanettenii\_77-13-4]\_XP\_003048915.1  
[Geobacillus sp. WSUCF1]\_EPR29489.1\_2Z5G  
[Trichoderma gracile]\_KAH0498535.1  
[Trichoderma semiorbis]\_KAH0532554.1  
[Trichoderma virens FT-333]\_UKZ73321.1  
[Trichoderma lentiforme]\_KAF3077685.1  
[Trichoderma simmonsii]\_QYS94233.1  
[Trichoderma guizhouense]\_OPB43634.1  
[Trichoderma harzianum]\_ThaL  
[Trichoderma harzianum]\_KKO99473.1  
[Trichoderma arundinaceum]\_RFU75476.1  
[Trichoderma asperellum CBS\_433.97]\_XP\_0247565  
[Trichoderma asperelloides]\_KAH8131048.1

[Candida albicans]\_ADP21191.1  
[Parastagonospora nodorum SN15]\_XP\_001800960.1  
[Talaromyces cellulolyticus]\_GAM42581.1  
[Fusarium oxysporum]\_ABR12479.1  
[Verticillium dahliae VdLs.17]\_EGY21687.1  
[Melampsora]  
[Cryptococcus gattii]  
[Fusarium vanettenii\_77-13-4]\_XP\_003048915.1  
[Geobacillus sp. WSUCF1]\_EPR29489.1\_2Z5G  
[Trichoderma gracile]\_KAH0498535.1  
[Trichoderma semiorbis]\_KAH0532554.1  
[Trichoderma virens FT-333]\_UKZ73321.1  
[Trichoderma lentiforme]\_KAF3077685.1  
[Trichoderma simmonsii]\_QYS94233.1  
[Trichoderma guizhouense]\_OPB43634.1  
[Trichoderma harzianum]\_ThaL  
[Trichoderma harzianum]\_KKO99473.1  
[Trichoderma arundinaceum]\_RFU75476.1  
[Trichoderma asperellum CBS\_433.97]\_XP\_0247565  
[Trichoderma asperelloides]\_KAH8131048.1

[Candida albicans]\_ADP21191.1  
[Parastagonospora nodorum SN15]\_XP\_001800960.1  
[Talaromyces cellulolyticus]\_GAM42581.1  
[Fusarium oxysporum]\_ABR12479.1  
[Verticillium dahliae VdLs.17]\_EGY21687.1  
[Melampsora]  
[Cryptococcus gattii]  
[Fusarium vanettenii\_77-13-4]\_XP\_003048915.1  
[Geobacillus sp. WSUCF1]\_EPR29489.1\_2Z5G  
[Trichoderma gracile]\_KAH0498535.1  
[Trichoderma semiorbis]\_KAH0532554.1  
[Trichoderma virens FT-333]\_UKZ73321.1  
[Trichoderma lentiforme]\_KAF3077685.1  
[Trichoderma simmonsii]\_QYS94233.1  
[Trichoderma guizhouense]\_OPB43634.1  
[Trichoderma harzianum]\_ThaL  
[Trichoderma harzianum]\_KKO99473.1  
[Trichoderma arundinaceum]\_RFU75476.1  
[Trichoderma asperellum CBS\_433.97]\_XP\_0247565  
[Trichoderma asperelloides]\_KAH8131048.1

[Candida albicans]\_ADP21191.1  
[Parastagonospora nodorum SN15]\_XP\_001800960.1  
[Talaromyces cellulolyticus]\_GAM42581.1  
[Fusarium oxysporum]\_ABR12479.1  
[Verticillium dahliae VdLs.17]\_EGY21687.1  
[Melampsora]  
[Cryptococcus gattii]  
[Fusarium vanettenii\_77-13-4]\_XP\_003048915.1  
[Geobacillus sp. WSUCF1]\_EPR29489.1\_2Z5G  
[Trichoderma gracile]\_KAH0498535.1  
[Trichoderma semiorbis]\_KAH0532554.1  
[Trichoderma virens FT-333]\_UKZ73321.1  
[Trichoderma lentiforme]\_KAF3077685.1  
[Trichoderma simmonsii]\_QYS94233.1  
[Trichoderma guizhouense]\_OPB43634.1  
[Trichoderma harzianum]\_ThaL  
[Trichoderma harzianum]\_KKO99473.1  
[Trichoderma arundinaceum]\_RFU75476.1  
[Trichoderma asperellum CBS\_433.97]\_XP\_0247565  
[Trichoderma asperelloides]\_KAH8131048.1

|                                                |         |          |                           |                           |
|------------------------------------------------|---------|----------|---------------------------|---------------------------|
|                                                | 70      | 80       | 90                        | 100                       |
| [Candida albicans]_ADP21191.1                  | WQLLVRS | EDSFGNPN | ....VIVTTVIEPVNADPSKIASYQ | .....VF                   |
| [Parastagonospora nodorum SN15]_XP_001800960.1 | .....   | TFNGIP   | ....YAQPPVGGQLRLKAPQPLTS  | SAV.....GK                |
| [Talaromyces cellulolyticus]_GAM42581.1        | .....   | DFGNFK   | ....FYIQ                  | ....HGA...AA.YC.....NSEAA |
| [Fusarium oxysporum]_ABR12479.1                | .....   | LFSSLE   | ....RMSR                  | ....LVD...IA.YC.....VGTTG |
| [Verticillium dahliae VdLs.17]_EGY21687.1      | .....   | .....    | .....                     | .....                     |
| [Melampsora]                                   | .....   | .....    | .....                     | .....                     |
| [Cryptococcus gattii]                          | .....   | .....    | .....                     | .....                     |
| [Fusarium vanettenii 77-13-4]_XP_003048915.1   | .....   | .....    | .....                     | .....                     |
| [Geobacillus sp. WSUCF1]_EPR29489.1_2Z5G       | .....   | .....    | .....                     | .....                     |
| [Trichoderma gracile]_KAH0498535.1             | .....   | .....    | .....                     | .....                     |
| [Trichoderma semiorbis]_KAH0532554.1           | .....   | .....    | .....                     | .....                     |
| [Trichoderma virens FT-333]_UKZ73321.1         | .....   | .....    | .....                     | .....                     |
| [Trichoderma lentiforme]_KAF3077685.1          | .....   | .....    | .....                     | .....                     |
| [Trichoderma simmonsii]_QYS94233.1             | .....   | .....    | .....                     | .....                     |
| [Trichoderma guizhouense]_OPB43634.1           | .....   | .....    | .....                     | .....                     |
| [Trichoderma harzianum]_ThaL                   | .....   | .....    | .....                     | .....                     |
| [Trichoderma harzianum]_KKO99473.1             | .....   | .....    | .....                     | .....                     |
| [Trichoderma arundinaceum]_RFU75476.1          | .....   | .....    | .....                     | .....                     |
| [Trichoderma asperellum CBS_433.97]_XP_0247565 | .....   | .....    | .....                     | .....                     |
| [Trichoderma asperelloides]_KAH8131048.1       | .....   | .....    | .....                     | .....                     |

|                                                |        |           |                   |                 |                          |
|------------------------------------------------|--------|-----------|-------------------|-----------------|--------------------------|
|                                                | 110    | 120       | 130               | 140             | 150                      |
| [Candida albicans]_ADP21191.1                  | DAAKAD | CAPSYALQF | ....GSDLTTFVTQAE  | MYLMAPLLDQGYV   | V.....SPDCEGP            |
| [Parastagonospora nodorum SN15]_XP_001800960.1 | TASP   | RGCPQFFF  | .....STDOQN       | FPTN....VLGTL   | LNTPLFQTVTNAG....EDCLTI  |
| [Talaromyces cellulolyticus]_GAM42581.1        | QAQA   | ASCDQA    | .....CQTNLQ       | .....EGIDG      | VETFGPVPFDSDFY           |
| [Fusarium oxysporum]_ABR12479.1                | AGSK   | ITCSNN    | .....GC           | ..PTV.....QNGAT | IVTSFGSKTIGGGYV          |
| [Verticillium dahliae VdLs.17]_EGY21687.1      | VSEPF  | SCASR     | .....CIEFP        | TL....VLAKT     | WNTGIL.MK.....DSCGYI     |
| [Melampsora]                                   | WDQWN  | SVRRQN    | ILMDRSRRGSKNATQSL | ....QTLD        | AEKNLMEIDWKGLEIDLPLTNLQ  |
| [Cryptococcus gattii]                          | WAQ    | ....SYRAQ | ALNAN....G        | INTSLPE....YWL  | APDLTNPSDEWSDVEVTVPLDTRQ |
| [Fusarium vanettenii 77-13-4]_XP_003048915.1   | WMHK   | KSTSG     | LTLDRVE....TAEAF  | .....PPT        | EGGPD.....PLCDVA         |
| [Geobacillus sp. WSUCF1]_EPR29489.1_2Z5G       | ....K  | CCCR      | .....             | .....           | .....IM                  |
| [Trichoderma gracile]_KAH0498535.1             | WPRH   | HGPR      | .....             | .....           | .....LS                  |
| [Trichoderma semiorbis]_KAH0532554.1           | WPHW   | RGTR      | .....             | .....           | .....LP                  |
| [Trichoderma virens FT-333]_UKZ73321.1         | WRHW   | RSSR      | .....             | .....           | .....LR                  |
| [Trichoderma lentiforme]_KAF3077685.1          | WPHW   | RGTR      | .....             | .....           | .....LP                  |
| [Trichoderma simmonsii]_QYS94233.1             | WPHW   | RGTR      | .....             | .....           | .....LP                  |
| [Trichoderma guizhouense]_OPB43634.1           | WPHW   | RGTR      | .....             | .....           | .....LP                  |
| [Trichoderma harzianum]_ThaL                   | WPHW   | RGTR      | .....             | .....           | .....LP                  |
| [Trichoderma harzianum]_KKO99473.1             | WPHW   | RGTR      | .....             | .....           | .....LP                  |
| [Trichoderma arundinaceum]_RFU75476.1          | WHTY   | RGPR      | .....             | .....           | .....LS                  |
| [Trichoderma asperellum CBS_433.97]_XP_0247565 | WLLH   | RGPR      | .....             | .....           | .....LS                  |
| [Trichoderma asperelloides]_KAH8131048.1       | WLLH   | RGPC      | .....             | .....           | .....LS                  |

|                                                |         |             |                 |             |                            |
|------------------------------------------------|---------|-------------|-----------------|-------------|----------------------------|
|                                                | 160     | 170         | 180             | 190         | 200                        |
| [Candida albicans]_ADP21191.1                  | ..KSTFT | IGKSGQAVLNS | ....IR          | AA          | LKSGKITNIKDDAKVVMWGYSGGSL  |
| [Parastagonospora nodorum SN15]_XP_001800960.1 | NVQ     | .....RPSGT  | ....K           | ADAKLP      | ....VLF.....WIFGGGFE       |
| [Talaromyces cellulolyticus]_GAM42581.1        | AT      | ASNFNS      | QPGALIKLQQLNETT | LN          | IPPGTSFFL....MQYTSVGLNGSLV |
| [Fusarium oxysporum]_ABR12479.1                | ATD     | .....       | SARKEIV         | .....VSFRGS | IN..IRNW...                |
| [Verticillium dahliae VdLs.17]_EGY21687.1      | AVDH    | GV          | RPD.....TKEDER  | DLGGKAI     | .....IAFRG                 |
| [Melampsora]                                   | TL      | I.....      | SLAKMT          | TNN         | AYTIP.....NDR              |
| [Cryptococcus gattii]                          | TVL     | .....       | ALAKMT          | SN          | AYVTP.....GGAGWY           |
| [Fusarium vanettenii 77-13-4]_XP_003048915.1   | YYA     | .....       | RRVG            | LDVE        | TFEVQ.....TEDG             |
| [Geobacillus sp. WSUCF1]_EPR29489.1_2Z5G       | FVL     | .....       | LGL             | .....       | .....WFV                   |
| [Trichoderma gracile]_KAH0498535.1             | RS      | L.....      | PNL             | .....R      | .....SR                    |
| [Trichoderma semiorbis]_KAH0532554.1           | RS      | L.....      | LSL             | .....Q      | .....P                     |
| [Trichoderma virens FT-333]_UKZ73321.1         | AS      | L.....      | LN              | .....R      | .....S                     |
| [Trichoderma lentiforme]_KAF3077685.1          | RS      | L.....      | LKL             | .....Q      | .....P                     |
| [Trichoderma simmonsii]_QYS94233.1             | RS      | L.....      | LSL             | .....Q      | .....P                     |
| [Trichoderma guizhouense]_OPB43634.1           | RS      | L.....      | LSL             | .....Q      | .....P                     |
| [Trichoderma harzianum]_ThaL                   | RS      | L.....      | LSL             | .....Q      | .....P                     |
| [Trichoderma harzianum]_KKO99473.1             | RS      | L.....      | LSL             | .....Q      | .....P                     |
| [Trichoderma arundinaceum]_RFU75476.1          | RS      | L.....      | PNL             | .....R      | .....P                     |
| [Trichoderma asperellum CBS_433.97]_XP_0247565 | RPP     | .....       | PNL             | .....R      | .....S                     |
| [Trichoderma asperelloides]_KAH8131048.1       | PS      | L.....      | PNL             | .....R      | .....S                     |

|                                                |       |                       |          |
|------------------------------------------------|-------|-----------------------|----------|
|                                                | 210   | 220                   | 230      |
| [Candida albicans]_ADP21191.1                  | LQPSY | .....                 | AP       |
| [Parastagonospora nodorum SN15]_XP_001800960.1 | DGTS  | L.....                | VA       |
| [Talaromyces cellulolyticus]_GAM42581.1        | VALPF | .....                 | SAN      |
| [Fusarium oxysporum]_ABR12479.1                | ..... | .....                 | LTN      |
| [Verticillium dahliae VdLs.17]_EGY21687.1      | ..... | .....                 | VVDL     |
| [Melampsora]                                   | DSFGW | .....                 | EE       |
| [Cryptococcus gattii]                          | TPFGW | .....                 | EPD      |
| [Fusarium vanettenii 77-13-4]_XP_003048915.1   | DPKEY | TELDGS                | TR       |
| [Geobacillus sp. WSUCF1]_EPR29489.1_2Z5G       | STGK  | PLDDSHDPRIRDLGRQIL    | DDYATIRE |
| [Trichoderma gracile]_KAH0498535.1             | STAK  | PL.....RHDPRIRDLGRLIH | DDYATIRE |
| [Trichoderma semiorbis]_KAH0532554.1           | STAR  | PLSSSGHDPRIRDLGRRIH   | DDYATIRE |
| [Trichoderma virens FT-333]_UKZ73321.1         | STAK  | PLSSSHDPRIRDLGRLIH    | DDYATIRE |
| [Trichoderma lentiforme]_KAF3077685.1          | STTK  | PL.....RHDPRIRDLGRLIH | DDYATIRE |
| [Trichoderma simmonsii]_QYS94233.1             | STAK  | PL.....RHDPRIRDLGRLIH | DDYATIRE |
| [Trichoderma guizhouense]_OPB43634.1           | STAK  | PL.....RHDPRIRDLGRLIH | DDYATIRE |
| [Trichoderma harzianum]_ThaL                   | STAK  | PL.....RHDPRIRDLGRLIH | DDYATIRE |
| [Trichoderma harzianum]_KKO99473.1             | STAK  | PVLRPSNDPRIRDLGRRIH   | DDYATIRE |
| [Trichoderma arundinaceum]_RFU75476.1          | STAK  | PHLKSSHDPRIRDLGRRIH   | DEYATIRE |
| [Trichoderma asperellum CBS_433.97]_XP_0247565 | STAK  | PHLKSNHDPRIRDLGRRIH   | DEYATIRE |
| [Trichoderma asperelloides]_KAH8131048.1       | STAK  | PHLKSNHDPRIRDLGRRIH   | DEYATIRE |

[Candida albicans] ADP21191.1  
[Parastagonospora nodorum SN15] XP\_001800960.1  
[Talaromyces cellulolyticus] GAM42581.1  
[Fusarium oxysporum] ABR12479.1  
[Verticillium dahliae VdLs.17] EGY21687.1  
[Melampsora]  
[Cryptococcus gattii]  
[Fusarium vanettenii 77-13-4] XP\_003048915.1  
[Geobacillus sp. WSUCF1] EPR29489.1\_2Z5G  
[Trichoderma gracile] KAH0498535.1  
[Trichoderma semiorbis] KAH0532554.1  
[Trichoderma virens FT-333] UKZ73321.1  
[Trichoderma lentiforme] KAF3077685.1  
[Trichoderma simmonsii] QYS94233.1  
[Trichoderma guizhouense] OPB43634.1  
[Trichoderma harzianum] Thal  
[Trichoderma harzianum] KKO99473.1  
[Trichoderma arundinaceum] RFU75476.1  
[Trichoderma asperellum CBS\_433.97] XP\_0247565  
[Trichoderma asperelloides] KAH8131048.1

[Candida albicans] ADP21191.1  
[Parastagonospora nodorum SN15] XP\_001800960.1  
[Talaromyces cellulolyticus] GAM42581.1  
[Fusarium oxysporum] ABR12479.1  
[Verticillium dahliae VdLs.17] EGY21687.1  
[Melampsora]  
[Cryptococcus gattii]  
[Fusarium vanettenii 77-13-4] XP\_003048915.1  
[Geobacillus sp. WSUCF1] EPR29489.1\_2Z5G  
[Trichoderma gracile] KAH0498535.1  
[Trichoderma semiorbis] KAH0532554.1  
[Trichoderma virens FT-333] UKZ73321.1  
[Trichoderma lentiforme] KAF3077685.1  
[Trichoderma simmonsii] QYS94233.1  
[Trichoderma guizhouense] OPB43634.1  
[Trichoderma harzianum] Thal  
[Trichoderma harzianum] KKO99473.1  
[Trichoderma arundinaceum] RFU75476.1  
[Trichoderma asperellum CBS\_433.97] XP\_0247565  
[Trichoderma asperelloides] KAH8131048.1

[Candida albicans] ADP21191.1  
[Parastagonospora nodorum SN15] XP\_001800960.1  
[Talaromyces cellulolyticus] GAM42581.1  
[Fusarium oxysporum] ABR12479.1  
[Verticillium dahliae VdLs.17] EGY21687.1  
[Melampsora]  
[Cryptococcus gattii]  
[Fusarium vanettenii 77-13-4] XP\_003048915.1  
[Geobacillus sp. WSUCF1] EPR29489.1\_2Z5G  
[Trichoderma gracile] KAH0498535.1  
[Trichoderma semiorbis] KAH0532554.1  
[Trichoderma virens FT-333] UKZ73321.1  
[Trichoderma lentiforme] KAF3077685.1  
[Trichoderma simmonsii] QYS94233.1  
[Trichoderma guizhouense] OPB43634.1  
[Trichoderma harzianum] Thal  
[Trichoderma harzianum] KKO99473.1  
[Trichoderma arundinaceum] RFU75476.1  
[Trichoderma asperellum CBS\_433.97] XP\_0247565  
[Trichoderma asperelloides] KAH8131048.1

[Candida albicans] ADP21191.1  
[Parastagonospora nodorum SN15] XP\_001800960.1  
[Talaromyces cellulolyticus] GAM42581.1  
[Fusarium oxysporum] ABR12479.1  
[Verticillium dahliae VdLs.17] EGY21687.1  
[Melampsora]  
[Cryptococcus gattii]  
[Fusarium vanettenii 77-13-4] XP\_003048915.1  
[Geobacillus sp. WSUCF1] EPR29489.1\_2Z5G  
[Trichoderma gracile] KAH0498535.1  
[Trichoderma semiorbis] KAH0532554.1  
[Trichoderma virens FT-333] UKZ73321.1  
[Trichoderma lentiforme] KAF3077685.1  
[Trichoderma simmonsii] QYS94233.1  
[Trichoderma guizhouense] OPB43634.1  
[Trichoderma harzianum] Thal  
[Trichoderma harzianum] KKO99473.1  
[Trichoderma arundinaceum] RFU75476.1  
[Trichoderma asperellum CBS\_433.97] XP\_0247565  
[Trichoderma asperelloides] KAH8131048.1

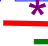

310

|                                                |                                              |                                              |                      |
|------------------------------------------------|----------------------------------------------|----------------------------------------------|----------------------|
| [Candida albicans]_ADP21191.1                  | .....KNPKIKGV.....                           | .....FSTVFFDQAT.....TAQIDSLVG.....           | .....YQTITE...DGSPFR |
| [Parastagonospora nodorum SN15]_XP_001800960.1 | LYDILTANPNSSGYWP.....                        | .....FVSNQA.....                             | .....MVKNIFDELPPFL   |
| [Talaromyces cellulolyticus]_GAM42581.1        | PVDIYTYGSPRVGNVQLSA.....                     | .....GGEYRVTHADDPVPL                         | .....                |
| [Fusarium oxysporum]_ABR12479.1                | DLLVTFGEKPKVGNPLCD.....                      | .....YVDVAVFALDTEAE.AAGAADPEKRVYRRVTHADDPVPL | .....                |
| [Verticillium dahliae VdLs.17]_EGY21687.1      | EMSAVT.....                                  | .....HVFHTADPIAMGTCNGVISTCSVA.....           | .....GYAMESRCHVGKSI  |
| [Melampsora]                                   | NMTGIT.....                                  | .....HVVYHTADPIAMGVCNGAYSACYAA.....          | .....GFAMESKCHTGETIL |
| [Cryptococcus gattii]                          | ALAPAAAGPLIKMYFKFMRISPLFRLMF.....            | .....GIHA.FIPFMMQMHQL.LDPRV                  | .....                |
| [Fusarium vanettenii 77-13-4]_XP_003048915.1   | VLSVTIATPHDGTTLVNMVDFDTRF.FDLQKAVLEAAAVAS.NV | .....PYTS.....                               | .....QV              |
| [Geobacillus sp. WSUCF1]_EPR29489.1_2Z5G       | VASLVTIATPHRGSFPADYLVDSADAG.S.....           | .....PL.HLP.....                             | .....R.              |
| [Trichoderma gracile]_KAH0498535.1             | IASLVTIATPHRGSFPADYLVDSADAG.....             | .....PL.HLP.....                             | .....R.              |
| [Trichoderma semiorbis]_KAH0532554.1           | IASLVTIATPHRGSFPADYLVDSADAG.....             | .....PL.HLP.....                             | .....R.              |
| [Trichoderma virens FT-333]_UKZ73321.1         | IASLVTIATPHRGSFPADYLVDSADAG.....             | .....PL.HLP.....                             | .....R.              |
| [Trichoderma lentiforme]_KAF3077685.1          | IASLVTIATPHRGSFPADYLVDSADAG.....             | .....PL.HLP.....                             | .....R.              |
| [Trichoderma simmonsii]_QYS94233.1             | IASLVTIATPHRGSFPADYLVDSADAG.....             | .....PL.HLP.....                             | .....R.              |
| [Trichoderma guizhouense]_OPB43634.1           | IASLVTIATPHRGSFPADYLVDSADAG.....             | .....PL.HLP.....                             | .....R.              |
| [Trichoderma harzianum]_ThaL                   | IASLVTIATPHRGSFPADYLVDSADAG.....             | .....PL.HLP.....                             | .....R.              |
| [Trichoderma harzianum]_KKO99473.1             | IASLVTIATPHRGSFPADYLVDSADAG.....             | .....PL.HLP.....                             | .....R.              |
| [Trichoderma arundinaceum]_RFU75476.1          | IASLVTIATPHRGSFPADYLVDSADAG.....             | .....PL.HLP.....                             | .....R.              |
| [Trichoderma asperellum CBS_433.97]_XP_0247565 | VASLVTIATPHRGSFPADYLVDSADAG.....             | .....PI.HLP.....                             | .....R.              |
| [Trichoderma asperelloides]_KAH8131048.1       | VASLVTIATPHRGSFPADYLVDSADAG.....             | .....PI.HLP.....                             | .....Q.              |

|                                                |                                       |                                       |                |
|------------------------------------------------|---------------------------------------|---------------------------------------|----------------|
| [Candida albicans]_ADP21191.1                  | .....VEDNGLVYQ.....                   | .....K.....QLV                        | PKIPVFIYHG     |
| [Parastagonospora nodorum SN15]_XP_001800960.1 | TG.....LLNNWY.....                    | .....PQFKRVS.AILGDIPTITRRIFLELAS..... | AVNPSPVPSWSYLA |
| [Talaromyces cellulolyticus]_GAM42581.1        | .....PQPNLLTPTALNRTKLISELQCFDGLA..... | .....VLNQDLPWSGLVN                    | .....          |
| [Fusarium oxysporum]_ABR12479.1                | .....P.....                           | .....PLIFGYRH                         | .....          |
| [Verticillium dahliae VdLs.17]_EGY21687.1      | .....P.....                           | .....LTEWGYRS                         | .....          |
| [Melampsora]                                   | YDVTGKL.....                          | .....NWAVDIRTHSIKTVIENI.LIPDWD..      | .....          |
| [Cryptococcus gattii]                          | YDVTGVK.....                          | .....GWSVDLRTHRIEDVIDRV.LTDPWPV..     | .....          |
| [Fusarium vanettenii 77-13-4]_XP_003048915.1   | YGWLGKYKVSFLFDWTD.....                | .....RWDRLNRM.....                    | FQFAPVYVSAE    |
| [Geobacillus sp. WSUCF1]_EPR29489.1_2Z5G       | .....YDFKLDQWGL.....                  | .....RRQPGESFDHY.....                 | FERLKRSPVWTSTD |
| [Trichoderma gracile]_KAH0498535.1             | .....LYSV.....                        | .....IRRALGTSFAF.....                 | GQL.....       |
| [Trichoderma semiorbis]_KAH0532554.1           | .....LYGV.....                        | .....IRRALGTSFAF.....                 | GQL.....       |
| [Trichoderma virens FT-333]_UKZ73321.1         | .....LYGV.....                        | .....IRRALGTSFAF.....                 | GQL.....       |
| [Trichoderma lentiforme]_KAF3077685.1          | .....LYGV.....                        | .....IRRALGTSFAF.....                 | GQL.....       |
| [Trichoderma simmonsii]_QYS94233.1             | .....LYGV.....                        | .....IRRALGTSFAF.....                 | GQL.....       |
| [Trichoderma guizhouense]_OPB43634.1           | .....LYGV.....                        | .....IRRALGTSFAF.....                 | GQL.....       |
| [Trichoderma harzianum]_ThaL                   | .....LYGV.....                        | .....IRRALGTSFAF.....                 | GQL.....       |
| [Trichoderma harzianum]_KKO99473.1             | .....LYGI.....                        | .....IRRALGTSFAF.....                 | GQL.....       |
| [Trichoderma arundinaceum]_RFU75476.1          | .....LYGI.....                        | .....IRRALGTSFAF.....                 | GQL.....       |
| [Trichoderma asperellum CBS_433.97]_XP_0247565 | .....LYGI.....                        | .....IRRALGTSFAF.....                 | GQL.....       |
| [Trichoderma asperelloides]_KAH8131048.1       | .....LYGI.....                        | .....IRRALGTSFAF.....                 | GQL.....       |

|                                                |                                   |                                          |                 |
|------------------------------------------------|-----------------------------------|------------------------------------------|-----------------|
| [Candida albicans]_ADP21191.1                  | SIDQI.....                        | .....TPILGTFH.....                       | .....           |
| [Parastagonospora nodorum SN15]_XP_001800960.1 | TYDYG.....                        | .....NAYTAFQNIFFGAATGKKAYKDLLVINSVND...E | .....           |
| [Talaromyces cellulolyticus]_GAM42581.1        | MTPAITTQNG.....                   | .....GGDTVD.....                         | YTISDVKVC.....  |
| [Fusarium oxysporum]_ABR12479.1                | TTPEFWLSGG.....                   | .....LS.....                             | PSVEDVVVCR..... |
| [Verticillium dahliae VdLs.17]_EGY21687.1      | HGGEFFITKP.....                   | .....TPP.....                            | TCQNK.....      |
| [Melampsora]                                   | .....DDE.....                     | .....                                    | DGDEG.....      |
| [Cryptococcus gattii]                          | SMRWLIGR...ECFAKHKCILA...TKDALKAE | EEHMDGATDGRPVTPRTKSAIEAHRKHHPK           | .....           |
| [Fusarium vanettenii 77-13-4]_XP_003048915.1   | TARYDLVSVSGAEKLNQWVQASPNITYLSFS   | TERTYRGALTGNHYPE.....                    | .....L          |
| [Geobacillus sp. WSUCF1]_EPR29489.1_2Z5G       | TTRY.....                         | MRDEFNRPVDDERVYFSYGA.....                | .....           |
| [Trichoderma gracile]_KAH0498535.1             | TTRY.....                         | MREEFNRPVRDDEAVRYFSYGA.....              | .....           |
| [Trichoderma semiorbis]_KAH0532554.1           | TTRY.....                         | MRDEFNRPVRDDEAVRYFSYGA.....              | .....           |
| [Trichoderma virens FT-333]_UKZ73321.1         | TTRY.....                         | MREEFNRPVRDDEAVRYFSYGA.....              | .....           |
| [Trichoderma lentiforme]_KAF3077685.1          | TTRY.....                         | MREEFNRPVRDDEAVRYFSYGA.....              | .....           |
| [Trichoderma simmonsii]_QYS94233.1             | TTRY.....                         | MREEFNRPVRDDEAVRYFSYGA.....              | .....           |
| [Trichoderma guizhouense]_OPB43634.1           | TTRY.....                         | MREEFNRPVRDDEAVRYFSYGA.....              | .....           |
| [Trichoderma harzianum]_ThaL                   | TTRY.....                         | MREEFNRPVRDDEAVRYFSYGA.....              | .....           |
| [Trichoderma harzianum]_KKO99473.1             | TTRY.....                         | MREEFNRPVRDDEAVRYFSYGA.....              | .....           |
| [Trichoderma arundinaceum]_RFU75476.1          | TTRY.....                         | MREEFNRPVRDDEAVRYFSYGA.....              | .....           |
| [Trichoderma asperellum CBS_433.97]_XP_0247565 | TTRY.....                         | MREEFNRPVRDDEAVRYFSYGA.....              | .....           |
| [Trichoderma asperelloides]_KAH8131048.1       | TTRY.....                         | MREEFNRPVRDDEAVRYFSYGA.....              | .....           |

|                                                |                               |                                  |                            |
|------------------------------------------------|-------------------------------|----------------------------------|----------------------------|
| [Candida albicans]_ADP21191.1                  | .....VPVDTKKTYQNWCDAGISL      | EFADASNGHLTEAIMGAPAAALT          | .....                      |
| [Parastagonospora nodorum SN15]_XP_001800960.1 | .....T.....                   | IVVNATLKAWNTSSSGNNIHLSLYT.....   | .....                      |
| [Talaromyces cellulolyticus]_GAM42581.1        | .....                         | GAANLNCNGGT.LGLDIA.....          | .....                      |
| [Fusarium oxysporum]_ABR12479.1                | .....                         | GASDDQCIAGQDVEVEQVEAVADEVVQ..... | .....QEEEE                 |
| [Verticillium dahliae VdLs.17]_EGY21687.1      | .....                         | .....SI.....                     | FALRWPWGKHE.               |
| [Melampsora]                                   | GSGIWQKIAGK.....WYKC.....     | ANRVWPERDELFF..SSQDDD.....       | VEAWWGKKRRG.               |
| [Cryptococcus gattii]                          | GSTAWYNEQAPP.....AFW..VC      | GNLNV..DG.....                   | EKLLRFEKGR.                |
| [Fusarium vanettenii 77-13-4]_XP_003048915.1   | GMNAFSAVVCAPFLGSYRNPTLGTDDRWL | ENDGIV..NT.....                  | VSMNG.PKRGSS               |
| [Geobacillus sp. WSUCF1]_EPR29489.1_2Z5G       | .....                         | MIDEPSLLGAFRVPYGVWKEKE           | ENDGLV..SV..RSSRW...GEY    |
| [Trichoderma gracile]_KAH0498535.1             | .....                         | AIDEPPLLAGFRLPHGVVDKREG          | ENDGLV..FG.....FDQLV...ESR |
| [Trichoderma semiorbis]_KAH0532554.1           | .....                         | AIDEPSLLGAFRRLPHNVVDRREG         | ENDGLV..SV.....ESSRW...GMY |
| [Trichoderma virens FT-333]_UKZ73321.1         | .....                         | AIDEPSLLGAFRRLPHGVVDKREG         | ENDGLV..SV.....KSSRW...GVY |
| [Trichoderma lentiforme]_KAF3077685.1          | .....                         | AIDEPSLLGAFRRLPHGVVDKREG         | ENDGLV..SV.....KSSRW...GVY |
| [Trichoderma simmonsii]_QYS94233.1             | .....                         | AIDEPSLLGAFRRLPHGVVDKREG         | ENDGLV..SV.....KSSRW...GVY |
| [Trichoderma guizhouense]_OPB43634.1           | .....                         | AIDEPSLLGAFRRLPHGVVDKREG         | ENDGLV..SV.....KSSRW...GVY |
| [Trichoderma harzianum]_ThaL                   | .....                         | AIDEPSLLGAFRRLPHGVVDKREG         | ENDGLV..SV.....KSSRW...GVY |
| [Trichoderma harzianum]_KKO99473.1             | .....                         | AIDEPSLLGAFRRLPHGVVDKREG         | ENDGLV..SV.....KSSRW...GVY |
| [Trichoderma arundinaceum]_RFU75476.1          | .....                         | AIDEPSLLGAFRRLPHGVVDKREG         | ENDGLV..SV.....KSSRW...GVY |
| [Trichoderma asperellum CBS_433.97]_XP_0247565 | .....                         | AIDEPSLLGAFRRLPHGVVDKREG         | ENDGLV..SV.....KSSRW...GVY |
| [Trichoderma asperelloides]_KAH8131048.1       | .....                         | AIDEPSLLGAFRRLPHGVVDKREG         | ENDGLV..SV.....KSSRW...GVY |

\*

|                                                | 390        | 400              | 410                 | 420   | 430                           |
|------------------------------------------------|------------|------------------|---------------------|-------|-------------------------------|
| [Candida albicans]_ADP21191.1                  | WIIDRF     | GKQT             | .....VSGCQ          | HT    | QRFNSNLEYPNIPSSIANFYKAAAMD... |
| [Parastagonospora nodorum SN15]_XP_001800960.1 | .....GVL   | LPNN             | .....AAKSIRG        | YY    | SFIYELDPNKGNNLDDWPQWSQSKLL    |
| [Talaromyces cellulolyticus]_GAM42581.1        | .....GGL   | .....            | .....SHT            | ..... | QSFPAS...SPEWLQWLDN..QF       |
| [Fusarium oxysporum]_ABR12479.1                | .....      | .....            | .....               | ..... | .....AHLHYF                   |
| [Verticillium dahliae VdLs.17]_EGY21687.1      | EQEERLA    | GAVEGT           | .....AP.QERR        | WV    | .....KRFPSVPAKFKLWQLFFAHRDYF  |
| [Melampsora]                                   | NGTEPCE    | G...NKP          | .....KNSIPEASVQECEE | G     | .....                         |
| [Cryptococcus gattii]                          | RKKEREG    | K...EDPEWEKHGGVP | KAISEED             | CV    | .....DCY                      |
| [Fusarium vanettenii 77-13-4]_XP_003048915.1   | .....EPFVD | VVH              | .....SKTIPEYE       | HL    | .....DVI                      |
| [Geobacillus sp. WSUCF1]_EPR29489.1_2Z5G       | DRIVPYD    | GTLKKGVWN        | .....DMGTYNVD       | HL    | .....EII                      |
| [Trichoderma gracile]_KAH0498535.1             | .....KGT   | L.....           | .....VGVS           | HL    | .....DLI                      |
| [Trichoderma semiorbis]_KAH0532554.1           | .....EVD   | GEG              | .....VDGHEE         | ..... | .....DV                       |
| [Trichoderma virens FT-333]_UKZ73321.1         | .....KGT   | L.....           | .....MGVS           | HL    | .....DLI                      |
| [Trichoderma lentiforme]_KAF3077685.1          | .....KGT   | L.....           | .....MGVS           | HL    | .....DLI                      |
| [Trichoderma simmonsii]_QYS94233.1             | .....KGT   | L.....           | .....MGVS           | HL    | .....DLI                      |
| [Trichoderma guizhouense]_OPB43634.1           | .....KGT   | L.....           | .....MGVS           | HL    | .....DLI                      |
| [Trichoderma harzianum]_ThaL                   | .....KGT   | L.....           | .....MGVS           | HL    | .....DLI                      |
| [Trichoderma harzianum]_KKO99473.1             | .....KGT   | L.....           | .....MGVS           | HL    | .....DLI                      |
| [Trichoderma arundinaceum]_RFU75476.1          | .....KGT   | L.....           | .....MGVS           | HL    | .....DLI                      |
| [Trichoderma asperellum CBS_433.97]_XP_0247565 | .....QGT   | L.....           | .....MGVS           | HL    | .....DLI                      |
| [Trichoderma asperelloides]_KAH8131048.1       | .....QGT   | L.....           | .....MGVS           | HL    | .....DLI                      |

\*

|                                                | 440     | 450                      | 460                    |
|------------------------------------------------|---------|--------------------------|------------------------|
| [Candida albicans]_ADP21191.1                  | ....VVL | LLGLGPDVQKDQVNPEGIKKLGS  | .....IEMRWL.....       |
| [Parastagonospora nodorum SN15]_XP_001800960.1 | NF      | .....GANRNSLLDDN         | ...FRKDTEDWLKVNMF...   |
| [Talaromyces cellulolyticus]_GAM42581.1        | KSGGT   | VNATGCSISTATPLISPIGIVSNG | .....                  |
| [Fusarium oxysporum]_ABR12479.1                | QATDAC  | NAGGF..S.WRRYRSAESVDK    | SRATMTDAELEKKLNSYVQMDK |
| [Verticillium dahliae VdLs.17]_EGY21687.1      | WRIGLC  | VPGGDPAN.WGREKYPDGG      | ...GGDDARLEEL.....     |
| [Melampsora]                                   | K.....  | .....                    | WEFKD                  |
| [Cryptococcus gattii]                          | K.....  | .....                    | WEFG                   |
| [Fusarium vanettenii 77-13-4]_XP_003048915.1   | WAMDA   | .....VDQVFKEVREVLWKT     | C.DVRDICRVPEGC         |
| [Geobacillus sp. WSUCF1]_EPR29489.1_2Z5G       | GVDP    | .....                    | .....NPS               |
| [Trichoderma gracile]_KAH0498535.1             | N.....  | .....                    | .....                  |
| [Trichoderma semiorbis]_KAH0532554.1           | NWSNR   | .....                    | ARWTVR                 |
| [Trichoderma virens FT-333]_UKZ73321.1         | NWSNR   | .....                    | ARWTVR                 |
| [Trichoderma lentiforme]_KAF3077685.1          | NWSNR   | .....                    | ARWTVR                 |
| [Trichoderma simmonsii]_QYS94233.1             | NWSNR   | .....                    | ARWTVR                 |
| [Trichoderma guizhouense]_OPB43634.1           | NWSNR   | .....                    | ARWTVR                 |
| [Trichoderma harzianum]_ThaL                   | NWSNR   | .....                    | ARWTVR                 |
| [Trichoderma harzianum]_KKO99473.1             | NWSNR   | .....                    | ARWTVR                 |
| [Trichoderma arundinaceum]_RFU75476.1          | NWSNR   | .....                    | AAWTMR                 |
| [Trichoderma asperellum CBS_433.97]_XP_0247565 | NWSNR   | .....                    | AAWTMR                 |
| [Trichoderma asperelloides]_KAH8131048.1       | NWSNR   | .....                    | AAWTMR                 |

|                                                |                                |
|------------------------------------------------|--------------------------------|
| [Candida albicans]_ADP21191.1                  | .....                          |
| [Parastagonospora nodorum SN15]_XP_001800960.1 | .....                          |
| [Talaromyces cellulolyticus]_GAM42581.1        | .....                          |
| [Fusarium oxysporum]_ABR12479.1                | .....                          |
| [Verticillium dahliae VdLs.17]_EGY21687.1      | .....                          |
| [Melampsora]                                   | .....                          |
| [Cryptococcus gattii]                          | .....                          |
| [Fusarium vanettenii 77-13-4]_XP_003048915.1   | EHVEPRKPKVSVVAEDVIDETQSSSSSGEN |
| [Geobacillus sp. WSUCF1]_EPR29489.1_2Z5G       | ..FDIRAFYLRRLAEQLASLQP.....    |
| [Trichoderma gracile]_KAH0498535.1             | .....                          |
| [Trichoderma semiorbis]_KAH0532554.1           | .....                          |
| [Trichoderma virens FT-333]_UKZ73321.1         | ..FNAVAFYLDVVDMLAKEGL.....     |
| [Trichoderma lentiforme]_KAF3077685.1          | ..FNAVAFYLDVADMLAKEGL.....     |
| [Trichoderma simmonsii]_QYS94233.1             | ..FNAVAFYLDVADMLAKEGL.....     |
| [Trichoderma guizhouense]_OPB43634.1           | ..FNAVAFYLDVADMLAKEGL.....     |
| [Trichoderma harzianum]_ThaL                   | ..FNAVAFYLDVADMLAKEGL.....     |
| [Trichoderma harzianum]_KKO99473.1             | ..FNAVAFYLDVADMLAKEGL.....     |
| [Trichoderma arundinaceum]_RFU75476.1          | ..FNAVAFYLDVADMLAKEGL.....     |
| [Trichoderma asperellum CBS_433.97]_XP_0247565 | ..FNAVAFYLDVADMLAKEGL.....     |
| [Trichoderma asperelloides]_KAH8131048.1       | ..FNAVAFYLDVADMLAKEGL.....     |
