# Supplementary material for: Identification of a Novel Lipase with AHSMG Pentapeptide in Hypocreales and Glomerellales Filamentous Fungi
Source: MDPI journal article supplement (doi:10.3390/ijms23169367), 2022-08-19
Supplement: s1 [file s1]

## 2Z5G\_1 | Chains

[Trichosporon\_asahii\_var.\_asahii]\_AGN98126.1\_TaLi

.....MR

## 2Z5G\_1 | Chains

[illegible]

[illegible]



The diagram shows a four-point function with external legs labeled  $\beta 1$ ,  $\eta 1$ , and  $\alpha 1$ . Internal lines are labeled  $10$ ,  $30$ ,  $40$ , and  $TT$ . The diagram is a tree-level exchange process.

225G\_1[Chains] .....RAN DAPYIVLLHGLTGWGREEMFG.F...K.YWGGVVRGDIEQWLND..NGYR...  
[Trichoderma harzianum]\_ThaL .....ATP YPIVLAHGLGFGSELRVSP.LLPTIEYWNIGIK...QALTA..NNCT...  
[Trichoderma harzianum]\_KKO99473.1 .....ATP KYPIVLAHGLGFGSELRVSP.LLPTIEYWNIGIK...QALTA..NNCT...  
[Trichoderma guizhouense]\_QPB43634.1 .....ATP KYPIVLAHGLGFGSELRVSP.LLPTIEYWNIGIK...QALTA..NNCT...  
[Trichoderma simmonsii]\_QYS94233.1 .....ATP KYPIVLAHGLGFGSELRVSP.LLPTIEYWNIGIK...QALTA..NNCT...  
[Trichoderma harzianum\_CBS\_226\_95]\_XP\_024777038.1 .....ATP KYPIVLAHGLGFGSELRVSP.LLPTIEYWNIGIK...QALTA..NNCT...  
[Trichoderma harzianum]\_PKK42226.1 .....ATP KYPIVLAHGLGFGSELRVSP.LLPTIEYWNIGIK...QALTA..NNCT...  
[Trichoderma lentiforme]\_KAF3077685.1\_ .....ATP KYPIVLAHGLGFGSELRVSP.LLPTIEYWNIGIK...QALTA..NNCT...  
[Trichoderma harzianum]\_PNP59423.1 .....LLSAR TYPVLAHGLGFGSELRVSP.LLPTIEYWNIGIK...QALTA..NNCT...  
[Trichoderma virens\_FT-333]\_UKZ73321.1 .....ATP KYPIVLAHGLGFGSELKVP.LLPTIEYWNIGIK...QALTA..NNCT...  
[Trichoderma virens\_GV29-8]\_XP\_013960763.1 .....ATP KYPIVLAHGLGFGSELRVSP.LLPTIEYWNIGIK...QALTA..NNCT...  
[Trichoderma asperellum\_CBS\_433\_97]\_XP\_024756506.1 .....ATP KHPVLAHGLGFGSELRVSA.LLPTIEYWHGIG...QALAQ..NNCT...  
[Trichoderma atroviride\_IMI\_206040]\_XP\_013943551.1 .....ATP KHPVLAHGLGFGSELRVSA.LLPTIEYWHGIG...QALRQ..NNCA...  
[Trichoderma gamsii]\_PNP38305.1 .....TDTTTA TP KYPIVLAHGLGFGSELRVSA.LLPTIEYWHGIG...QALTO..NNCA...  
[Trichoderma gamsii]\_XP\_018663207.1 .....TDTTTA TP KYPIVLAHGLGFGSELRVSA.LLPTIEYWHGIG...QALTO..NNCA...  
[Trichoderma arundinaceum]\_RFU75476.1 .....ATP KHPVLAHGLGFGSELRVSA.LLPTIEYWHGIG...QALTE..NNCT...  
[Trichoderma gracile]\_KAH0498535.1 .....ATP KHPVLAHGLGFGSELKVP.YLPAIEYWHGIG...QALVA..NKCS...  
[Trichoderma reesei\_QM6a]\_XP\_006968245.1 .....ATP KHPVLAHGLGFGSELKVP.YLPAIEYWNIGIK...QALVA..NRCS...  
[Trichoderma citrinoviride]\_XP\_024753310.1 .....ATP KHPVLAHGLGFGSELKVP.YLPAIEYWHGIG...QALVA..NKCS...  
[Trichoderma longibrachiatum\_ATCC\_18648]\_PTB78011 .....ATP KHPVLAHGLGFGSELSSVS.ALPAVQYWHGIG...QALTA..QGCP...  
[Hirsutella minnesotensis\_3608]\_KJZ78693.1 .....ATP KHPVLAHGLGFGSELSSVS.ALPAVQYWHGIG...QALTA..QGCP...  
[Hirsutella rhossiliensis]\_XP\_044725020.1 .....ATP KHPVLAHGLGFGSELSSVS.ALPAVQYWHGIG...QALAA..QGCSN...  
[Ophiocordyceps sinensis\_C018]\_EQK99704.1 .....ATP KHPVLAHGLGFGSELSSVS.LLPAVQYWHGIG...QALAA..QGCPD...  
[Tolypocladium capitatum]\_PNY29418.1 .....RLTTAA TP KYPIVLAHGLGFGSELSSVS.ALPAVQYWHGIG...QALTA..QGCSR...  
[Tolypocladium ophioglossoides\_CBS\_100239]\_KND888 .....ATP KYPIVLAHGLGFGSELSSVS.ALPAVQYWHGIG...QALTA..QGCSR...  
[Tolypocladium paradoxum]\_POR38551.1 .....ATP KYPIVLAHGLGFGSELSSVS.ALPAVQYWHGIG...QALAA..QGCSR...  
[Drechmeria coniospora]\_ODA83100.1 .....LTP KHPVLAHGLGFGAELSSVS.LVPLRYWHGIE...QALAT..QGCP...  
[Drechmeria coniospora]\_XP\_040657415.1 .....LTP KHPVLAHGLGFGAELSSVS.LVPLRYWHGIE...QALAT..QGCP...  
[Ophiocordyceps unilateralis]\_PFH57814.1 .....ATP KHPVLAHGLGFGSELSSVS.LVPAVQYWHGIG...QALVA..QGCP...  
[Fusarium\_sp.\_AF-6]\_RSL54391.1 .....KTP KYPIVLAHGLGFGAELRLAS.YLPAVEYWHGIR...DALTA..QGAT...  
[Fusarium\_kuroshium]\_RMJ16314.1 .....KTP KYPIVLAHGLGFGAELRLAS.YLPAVEYWHGIR...DALTA..QGAT...  
[Fusarium\_sp.\_AF-8]\_RSL70798.1 .....KTP KYPIVLAHGLGFGAELRLAS.YLPAVEYWHGIR...DALTA..QGAT...  
[Fusarium\_ambrosium]\_RSM11997.1 .....KTP KYPIVLAHGLGFGAELRLAS.YLPAVEYWHGIR...DALTA..QGAT...  
[Fusarium\_floridanum]\_RSL80024.1 .....KTP KYPIVLAHGLGFGAELRLAS.YLPAVEYWHGIR...DALTA..QGAT...  
[Fusarium\_vanettenii\_77-13-41]\_XP\_003050716.1 .....KTP KYPIVLAHGLGFGAELRLAS.YLPAVEYWHGIR...DALTA..QGAT...  
[Fusarium\_solani]\_XP\_046134414.1 .....KTP KYPIVLAHGLGFGAELRLAS.YLPAVEYWHGIR...DALTA..QGAT...  
[Fusarium\_albosuccineum]\_KAF4468415.1 .....STP KYPIVLAHGLGFGAELRLGS.YLPAVQYWHGIR...DALTA..QGAT...  
[Fusarium\_decemcellulare]\_KAF5011412.1 .....STP KYPIVLAHGLGFGAELRLGS.YLPAVQYWHGIR...DALTA..QGAT...  
[Fusarium\_sarcochrom]\_KAF4964785.1 .....ETP KYPIVLAHGLGFGAELRFS.YLPAVEYWHGIR...DALTA..QGAT...  
[Fusarium\_avenaceum]\_KAG6968652.1 .....DTP KYPIVLAHGLGFGAELRLSP.YFPAVEYWHGIR...DALTA..QGAT...  
[Fusarium\_avenaceum]\_KIL96274.1 .....DTP KYPIVLAHGLGFGAELRLSP.YFPAVEYWHGIR...DALTA..QGAT...  
[Fusarium\_avenaceum]\_KAG5656265.1 .....DTP KYPIVLAHGLGFGAELRLSP.YFPAVEYWHGIR...DALTA..QGAT...  
[Fusarium\_tricinctum]\_KAH7262197.1 .....DTP KYPIVLAHGLGFGAELRLSP.YFPAVEYWHGIR...DALTA..QGAT...  
[Fusarium\_heterosporum]\_KAF5663380.1 .....ETP KYPIVLAHGLGFGAELRLSS.YFPAVEYWHGIR...DALTA..QGAT...  
[Fusarium\_sp.\_MPI-SDFR-AT-0072]\_KAH7164412.1 .....ETP KYPIVLAHGLGFGAELRLAP.YFPAVEYWHGIR...DALTA..QGAT...  
[Fusarium\_oxysporum\_f.\_sp.\_rapae]\_KAG7414252.1 .....ETP KYPIVLAHGLGFGAELRLAP.YFPAVEYWHGIR...DALTA..QGAT...  
[Fusarium\_mangiferae]\_XP\_041681833.1 .....ETP KYPIVLAHGLGFGAELRLSP.YFPAVEYWHGIR...DALTA..QGAT...  
[Fusarium\_proliferatum]\_CVL11341.1 .....ETP KYPIVLAHGLGFGAELRLSP.YFPAVEYWHGIR...DALTA..QGAT...  
[Fusarium\_proliferatum\_ETL]\_XP\_031083673.1 .....ETP KYPIVLAHGLGFGAELRLSP.YFPAVEYWHGIR...DALTA..QGAT...  
[Fusarium\_fujikuroi]\_SCN78580.1 .....ETP KYPIVLAHGLGFGAELRLSP.YFPAVEYWHGIR...DALTA..QGAT...  
[Fusarium\_fujikuroi\_IMI\_58289]\_XP\_023430709.1 .....ETP KYPIVLAHGLGFGAELRLSP.YFPAVEYWHGIR...DALTA..QGAT...  
[Fusarium\_sp.\_NRRL\_25303]\_KAF5626228.1 .....ETP KYPIVLAHGLGFGAELRLSP.YFPAVEYWHGIR...DALTA..QGAT...  
[Fusarium\_xylarioides]\_KAG5746670.1 .....ETP KYPIVLAHGLGFGAELRLSP.YFPAVEYWHGIR...DALTA..QGAT...  
[Fusarium\_xylarioides]\_KAG5788219.1 .....ETP KYPIVLAHGLGFGAELRLSP.YFPAVEYWHGIR...DALTA..QGAT...  
[Fusarium\_pseudocircinatum]\_KAF5575212.1 .....ETP KYPIVLAHGLGFGAELRLSP.YFPAVEYWHGIR...DALTA..QGAT...  
[Fusarium\_pseudoanthophilum]\_KAF5575021.1 .....ETP KYPIVLAHGLGFGAELRLSP.YFPAVEYWHGIR...DALTA..QGAT...  
[Fusarium\_verticilliioides]\_RBQ71412.1 .....ETP KYPIVLAHGLGFGAELRLSP.YFPAVEYWHGIR...DALTA..QGAT...  
[Fusarium\_verticilliioides\_7600]\_XP\_018746479.1 .....ETP KYPIVLAHGLGFGAELRLSP.YFPAVEYWHGIR...DALTA..QGAT...  
[Fusarium\_oxysporum\_NRRL\_32931]\_XP\_031039788.1 .....ETP KYPIVLAHGLGFGAELRLSP.YFPAVEYWHGIR...DALTA..QGAT...  
[Fusarium\_oxysporum\_f.\_sp.\_lycopersici\_4287]\_XP\_0 .....ETP KYPIVLAHGLGFGAELRLSP.YFPAVEYWHGIR...DALTA..QGAT...  
[Fusarium\_oxysporum\_f.\_sp.\_cepae]\_RKK20771.1 .....ETP KYPIVLAHGLGFGAELRLSP.YFPAVEYWHGIR...DALTA..QGAT...  
[Fusarium\_redolens]\_XP\_046051341.1 .....AFHPH TP KYPIVLAHGLGFGAELRLSP.YFPAVEYWHGIR...DALTA..QGAT...  
[Fusarium\_austroafricanum]\_KAF4458007.1 .....ETP KYPIVLAHGLGFGAELRLSP.YFPAVEYWHGIR...DALTA..QGAT...  
[Fusarium\_flagelliforme]\_XP\_045986929.1 .....ETP KYPIVLAHGLGFGAELRLSP.YFPAVEYWHGIR...DALTA..QGAS...  
[Fusarium\_sp.\_FIESC\_RH6]\_KAI1056250.1 .....ETP KYPIVLAHGLGFGAELRLSP.YFPAVEYWHGIR...DALTA..QGAS...  
[Fusarium\_sporotrichioides]\_RGP72309.1 .....DTP KYPIVLAHGLGFGAELRLSP.YFPAVEYWHGIR...DALTV..QGAT...  
[Fusarium\_poae]\_XP\_044713592.1 .....DTP KYPIVLAHGLGFGAELRLSP.YFPAVEYWHGIR...DALTA..QGV...  
[Fusarium\_venenatum]\_XP\_025590637.1 .....DTP KYPIVLAHGLGFGAELRLSP.YFPAVEYWHGIR...DALTA..QGV...  
[Fusarium\_pseudograminearum]\_KAF0641638.1 .....DTP KYPIVLAHGLGFGAELRLSP.YFPAVEYWHGIR...DALTA..QGAT...  
[Fusarium\_graminearum]\_CAG1993854.1 .....DTP KYPIVLAHGLGFGAELRLSP.YFPAVEYWHGIR...DALTA..QGAT...  
[Fusarium\_graminearum]\_PCD31638.1 .....DTP KYPIVLAHGLGFGAELRLSP.YFPAVEYWHGIR...DALTA..QGAT...  
[Fusarium\_graminearum]\_CZS78629.1 .....DTP KYPIVLAHGLGFGAELRLSP.YFPAVEYWHGIR...DALTA..QGAT...  
[Fusarium

## 2Z5G\_1 | Chains

[*Trichosporon asahii* var. *asahii*] AGN98126.1 TaLi

.VFAPTYGTAGIIFAGAKVEDSSKEIAGVVDKVLASTG.....



[illegible]

\*

[illegible]



## 2Z5G\_1|Chains

## 2Z5G\_1|Chains

|                                                   | η5     |            | α7      |       | α8       |       | α9   |       | α10     |        | TT     |
|---------------------------------------------------|--------|------------|---------|-------|----------|-------|------|-------|---------|--------|--------|
|                                                   | 210    | 220        | 230     | 240   | 250      | 260   |      |       |         |        |        |
| [Trichoderma_harzianum]_ThaL                      | QVYDFK | LDQWGLRRQP | GESFDHY | FERL  | KRSPVWTS | TD    | TARY | DLVS  | GA      | EKLNQW | VQASPN |
| [Trichoderma_harzianum]_KKO99473.1                | RLYGV. | IRRAGLGTSA | .....   | FGQL  | .....    | TT    | TRY. | ..... | MREEFN  | RPVRD  | DEA    |
| [Trichoderma_guizhouense]_OPB43634.1              | RLYGV. | IRRAGLGTSA | .....   | FGQL  | .....    | TT    | TRY. | ..... | MREEFN  | RPVRD  | DEA    |
| [Trichoderma_simmonsii]_QYS94233.1                | RLYGV. | IRRAGLGTSA | .....   | FGQL  | .....    | TT    | TRY. | ..... | MREEFN  | RPVRD  | DEG    |
| [Trichoderma_harzianum_CBS_226_95]_XP_024777038.1 | RLYGV. | IRRAGLGTSA | .....   | FGQL  | .....    | TT    | TRY. | ..... | MREEFN  | RPVRD  | DEG    |
| [Trichoderma_harzianum]_PKK42226.1                | RLYGV. | IRRAGLGTSA | .....   | FGQL  | .....    | TT    | TRY. | ..... | MREEFN  | RPVRD  | DEG    |
| [Trichoderma_lentiforme]_KAF3077685.1             | RLYGV. | IRRAGLGTSA | .....   | FGQL  | .....    | TT    | TRY. | ..... | MREEFN  | RPVRD  | DEG    |
| [Trichoderma_harzianum]_PNP59423.1                | RLYGV. | IRRAGLGTSA | .....   | FGQL  | .....    | TT    | TRY. | ..... | MRDEFN  | RPVRD  | DEA    |
| [Trichoderma_virens_FT-333]_UKZ73321.1            | RLYGV. | IRRAGLGTSA | .....   | FGQL  | .....    | TT    | TRY. | ..... | MRDEFN  | RPVRD  | DEA    |
| [Trichoderma_virens_Gv29-8]_XP_013960763.1        | RLYGV. | IRRAGLGTSA | .....   | FGQL  | .....    | TT    | TRY. | ..... | MRDEFN  | RPVRD  | DEA    |
| [Trichoderma_asperellum_CBS_433_97]_XP_024756506  | RLYGI. | IRRAGLGTSA | .....   | FGQL  | .....    | TT    | TRY. | ..... | MREEFN  | RPVRD  | DES    |
| [Trichoderma_atroviride_IMI_206040]_XP_013943551  | RLYSI. | IRRAGLGTSA | .....   | FGQL  | .....    | TT    | TRY. | ..... | MRDEFN  | RPVRD  | DES    |
| [Trichoderma_gamsii]_PNP38305.1                   | RLYSI. | IRRAGLGTSA | .....   | FGQL  | .....    | TT    | TRY. | ..... | MREEFN  | RPVRD  | DEA    |
| [Trichoderma_gamsii]_XP_018663207.1               | RLYSI. | IRRAGLGTSA | .....   | FGQL  | .....    | TT    | TRY. | ..... | MREEFN  | RPVRD  | DEA    |
| [Trichoderma_arundinaceum]_RFU75476.1             | RLYGI. | IRRAGLGTSA | .....   | FGQL  | .....    | TT    | TRY. | ..... | MREEFN  | RPVRD  | DES    |
| [Trichoderma_gracile]_KAH0498535.1                | RLYSV. | IRRAGLGTSA | .....   | FGQL  | .....    | TT    | TRY. | ..... | MRDEFN  | RPVRD  | DER    |
| [Trichoderma_reesei_QM6a]_XP_006968245.1          | RLYSV. | IRRAGLGTSA | .....   | FGQL  | .....    | TT    | TRY. | ..... | MRDEFN  | RPVRD  | DQA    |
| [Trichoderma_citrinoviride]_XP_024753310.1        | RLYSV. | IRRAGLGTSA | .....   | FGQL  | .....    | TT    | TRY. | ..... | MRDEFN  | RPVRD  | DPA    |
| [Trichoderma_longibrachiatum_ATCC_18648]_PTB78011 | RLYSV. | IRRAGLGTSA | .....   | FGQL  | .....    | TT    | TRY. | ..... | MRDEFN  | RPVRD  | VEG    |
| [Hirsutella_minnesotensis_3608]_KJZ78693.1        | KLYGV. | LKAGLGTQA  | .....   | FAQL  | .....    | TT    | HY.  | ..... | MYNEFN  | QNP    | NPS    |
| [Hirsutella_rhoosiliensis]_XP_044725020.1         | KLYRL. | LEKAGLGTKA | .....   | FAQL  | .....    | TT    | RY.  | ..... | MAEFN   | QTP    | DPL    |
| [Ophiocordyceps_sinensis_CO18]_EQK99704.1         | RLYRV. | LEKAGLGTKA | .....   | FAQL  | .....    | TT    | RY.  | ..... | MAEFN   | QTP    | DPS    |
| [Tolypocladium_capitatum]_PNY29418.1              | RLYGV. | LQAGLGTKA  | .....   | FAQL  | .....    | TT    | RY.  | ..... | LADEFN  | PTED   | DPS    |
| [Tolypocladium_ophioglossoides_CBS_100239]_KND888 | KLYGV. | LQAGLGTKA  | .....   | FAQL  | .....    | TT    | RY.  | ..... | MADEFN  | PTED   | DPS    |
| [Tolypocladium_paradoxum]_POR38551.1              | RLYGV. | LQAGLGTKA  | .....   | FAQL  | .....    | TT    | RY.  | ..... | MADEFN  | PTED   | DPE    |
| [Drechmeria_coniospora]_ODA83100.1                | RLYSL. | LERAGLGTAA | .....   | FAQL  | .....    | TT    | RY.  | ..... | LATEFN  | PTED   | DPA    |
| [Drechmeria_coniospora]_XP_040657415.1            | RLYSL. | LERAGLGTAA | .....   | FAQL  | .....    | TT    | RY.  | ..... | LATEFN  | PTED   | DPA    |
| [Ophiocordyceps_unilateralis]_PFH57814.1          | RLYGL. | LRVGLGTQA  | .....   | FEQL  | .....    | TT    | LY.  | ..... | MTDDFN  | PTED   | DPS    |
| [Fusarium_sp._AF-6]_RSL54391.1                    | RLYWM. | LERAGLGTAA | .....   | FAQL  | .....    | TT    | RY.  | ..... | MADEFN  | PTED   | CDP    |
| [Fusarium_kuroshium]_RMJ16314.1                   | RLYWM. | LERAGLGTAA | .....   | FAQL  | .....    | TT    | RY.  | ..... | MADEFN  | PTED   | CPD    |
| [Fusarium_sp._AF-8]_RSL70798.1                    | RLYWM. | LERAGLGTAA | .....   | FAQL  | .....    | TT    | RY.  | ..... | MADEFN  | PTED   | CPD    |
| [Fusarium_ambrosium]_RSM11997.1                   | RLYWM. | LERAGLGTAA | .....   | FAQL  | .....    | TT    | RY.  | ..... | MADEFN  | PTED   | CPD    |
| [Fusarium_floridanum]_RSL80024.1                  | RLYWM. | LERAGLGTAA | .....   | FAQL  | .....    | TT    | RY.  | ..... | MADEFN  | PTED   | CPD    |
| [Fusarium_vanettenii_77-13-4]_XP_003050716.1      | RLYWM. | LERAGLGTAA | .....   | FAQL  | .....    | TT    | RY.  | ..... | MADEFN  | PTED   | CPD    |
| [Fusarium_solani]_XP_046134414.1                  | RLYWM. | LERAGLGTAA | .....   | FAQL  | .....    | TT    | RY.  | ..... | MTDEFN  | PTED   | CPD    |
| [Fusarium_albosuccineum]_KAF4468415.1             | RLYKT. | LERAGLGTAA | .....   | FAQL  | .....    | TT    | RY.  | ..... | MADEFN  | PTED   | CAD    |
| [Fusarium_decemcellulare]_KAF5011412.1            | RLYKT. | LERAGLGTAA | .....   | FAQL  | .....    | TT    | RY.  | ..... | MADEFN  | PTED   | CAD    |
| [Fusarium_sarcochrom]_KAF4964785.1                | RLYHT. | LEKAGLGTAA | .....   | FSQL  | .....    | TT    | RY.  | ..... | MAEFN   | PTED   | KPD    |
| [Fusarium_avenaceum]_KAH6968652.1                 | RLYQT. | FEKAGLGTAA | .....   | FSQL  | .....    | TT    | RY.  | ..... | MAEFN   | PTED   | RPD    |
| [Fusarium_avenaceum]_KIL96274.1                   | RLYQT. | FEKAGLGTAA | .....   | FSQL  | .....    | TT    | RY.  | ..... | MAEFN   | PTED   | RPD    |
| [Fusarium_avenaceum]_KAG5656265.1                 | RLYQT. | FEKAGLGTAA | .....   | FSQL  | .....    | TT    | RY.  | ..... | MAEFN   | PTED   | RPD    |
| [Fusarium_tricinctum]_KAH7262197.1                | RLYQT. | FEKAGLGTAA | .....   | FSQL  | .....    | TT    | RY.  | ..... | MAEFN   | PTED   | RPD    |
| [Fusarium_heterosporum]_KAF5663380.1              | RLYHT. | LEKAGLGTAA | .....   | FSQL  | .....    | TT    | RY.  | ..... | MAEFN   | PTED   | QPD    |
| [Fusarium_sp._MPI-SDFR-AT-0072]_KAH7164412.1      | QLYQT. | FEKAGLGTAA | .....   | FSQL  | .....    | TT    | RY.  | ..... | MAEFN   | PTED   | QPG    |
| [Fusarium_oxysporum_f._sp._rapae]_KAG7414252.1    | QLYQT. | FEKAGLGTAA | .....   | FSQL  | .....    | TT    | RY.  | ..... | MAEFN   | PTED   | QPD    |
| [Fusarium_mangiferae]_XP_041681833.1              | QLYQT. | FEKAGLGTAA | .....   | FSQL  | .....    | TT    | RY.  | ..... | MAEFN   | PTED   | QPD    |
| [Fusarium_proliferatum]_CVL11341.1                | QLYQT. | FEKAGLGTAA | .....   | FSQL  | .....    | TT    | RY.  | ..... | MAEFN   | PTED   | QPD    |
| [Fusarium_proliferatum_ET1]_XP_031083673.1        | QLYQT. | FEKAGLGTAA | .....   | FSQL  | .....    | TT    | RY.  | ..... | MAEFN   | PTED   | QPD    |
| [Fusarium_fujikuroi]_SCN78580.1                   | QLYQT. | FEKAGLGTAA | .....   | FSQL  | .....    | TT    | RY.  | ..... | MAEFN   | PTED   | QPD    |
| [Fusarium_fujikuroi_IMI_58289]_XP_023430709.1     | QLYQT. | FEKAGLGTAA | .....   | FSQL  | .....    | TT    | RY.  | ..... | MAEFN   | PTED   | QPD    |
| [Fusarium_sp._NRRL_25303]_KAF5626228.1            | QLYQT. | FEKAGLGTAA | .....   | FSQL  | .....    | TT    | RY.  | ..... | MAEFN   | PTED   | QPD    |
| [Fusarium_xylarioides]_KAG5746670.1               | QLYQT. | FEKAGLGTAA | .....   | FSQL  | .....    | TT    | RY.  | ..... | MAEFN   | PTED   | QPD    |
| [Fusarium_xylarioides]_KAG5788219.1               | QLYQT. | FEKAGLGTAA | .....   | FSQL  | .....    | TT    | RY.  | ..... | MAEFN   | PTED   | QPD    |
| [Fusarium_pseudocircinatum]_KAF5575212.1          | QLYQT. | FEKAGLGTAA | .....   | FSQL  | .....    | TT    | RY.  | ..... | MAEFN   | PTED   | QPD    |
| [Fusarium_pseudoanthophilum]_KAF5575021.1         | QLYQT. | FEKAGLGTAA | .....   | FSQL  | .....    | TT    | RY.  | ..... | MAEFN   | PTED   | QPD    |
| [Fusarium_verticilliioides]_RBQ71412.1            | QLYQT. | FEKAGLGTAA | .....   | FSQL  | .....    | TT    | RY.  | ..... | MAEFN   | PTED   | QPD    |
| [Fusarium_verticilliioides_7600]_XP_018746479.1   | QLYQT. | FEKAGLGTAA | .....   | FSQL  | .....    | TT    | RY.  | ..... | MAEFN   | PTED   | QPD    |
| [Fusarium_oxysporum_NRRL_32931]_XP_031039788.1    | QLYQT. | FEKAGLGTAA | .....   | FSQL  | .....    | TT    | RY.  | ..... | MAEFN   | PTED   | QPD    |
| [Fusarium_oxysporum_f._sp._lycopersici_4287]_XP_0 | QLYQT. | FEKAGLGTAA | .....   | FSQL  | .....    | TT    | RY.  | ..... | MAEFN   | PTED   | QPD    |
| [Fusarium_oxysporum_f._sp._cepae]_RKK20771.1      | QLYQT. | FEKAGLGTAA | .....   | FSQL  | .....    | TT    | RY.  | ..... | MAEFN   | PTED   | QPD    |
| [Fusarium_redolens]_XP_046051341.1                | QLYQT. | FEKAGLGTAA | .....   | FSQL  | .....    | TT    | RY.  | ..... | MAEFN   | PTED   | QPD    |
| [Fusarium_austroafricanum]_KAF4458007.1           | QLYQT. | LEKAGLGTAA | .....   | FSQL  | .....    | TT    | RY.  | ..... | MAEFN   | PTED   | QPD    |
| [Fusarium_flagelliforme]_XP_045986929.1           | RLYQT. | FERAGLGTAA | .....   | FSQL  | .....    | TT    | RY.  | ..... | MAEFN   | PTED   | RAD    |
| [Fusarium_sp._FIESC_RH6]_KAT1056250.1             | RLYQT. | FERAGLGTAA | .....   | FSQL  | .....    | TT    | RY.  | ..... | MAEFN   | PTED   | RAD    |
| [Fusarium_sporotrichioides]_RGP72309.1            | QLYKT. | LERAGLGTAA | .....   | FSQL  | .....    | TT    | RY.  | ..... | MAEFN   | PTED   | QPD    |
| [Fusarium_poae]_XP_044713592.1                    | QLYKT. | LERAGLGTAA | .....   | FSQL  | .....    | TT    | RY.  | ..... | MAEFN   | PTED   | QPD    |
| [Fusarium_venenatum]_XP_025590637.1               | QLYKT. | LERAGLGTAA | .....   | FSQL  | .....    | TT    | RY.  | ..... | MAEFN   | PTED   | QPD    |
| [Fusarium_pseudograminearum]_KAF0641638.1         | QLYKT. | LERAGLGTAA | .....   | FSQL  | .....    | TT    | RY.  | ..... | MAEFN   | PTED   | QPD    |
| [Fusarium_graminearum]_CAG1993854.1               | QLYKT. | LERAGLGTAA | .....   | FSQL  | .....    | TT    | RY.  | ..... | MAEFN   | PTED   | QPD    |
| [Fusarium_graminearum]_PCD31638.1                 | QLYKT. | LERAGLGTAA | .....   | FSQL  | .....    | TT    | RY.  | ..... | MAEFN   | PTED   | QPD    |
| [Fusarium_graminearum]_CZS78629.1                 | QLYKT. | LERAGLGTAA | .....   | FSQL  | .....    | TT    | RY.  | ..... | MAEFN   | PTED   | QPD    |
| [Fusarium_graminearum]_CAF3606094.1               | QLYKT. | LERAGLGTAA | .....   | FSQL  | .....    | TT    | RY.  | ..... | MAEFN   | PTED   | QPD    |
| [Fusarium_graminearum_PH-1]_XP_011318944.1        | QLYKT. | LERAGLGTAA | .....   | FSQL  | .....    | TT    | RY.  | ..... | MAEFN   | PTED   | QPD    |
| [Fusarium_culmorum]_QPC68571.1                    | QLYKT. | LERAGLGTAA | .....   | FSQL  | .....    | TT    | RY.  | ..... | MAEFN   | PTED   | QPD    |
| [Fusarium_pseudograminearum]_QPC77441.1           | QLYKT. | LERAGLGTAA | .....   | FSQL  | .....    | TT    | RY.  | ..... | MAEFN   | PTED   | QPD    |
| [Fusarium_longipes]_RGP79158.1                    | QLYKT. | LERAGLGTAA | .....   | FSQL  | .....    | TT    | RY.  | ..... | MAEFN   | PTED   | QPD    |
| [Ilyonectria_destructans]_KAH7011941.1            | RLYGA. | IERAGFGTAA | .....   | FAQL  | .....    | TT    | RY.  | ..... | MOEFN   | PATPD  | SPD    |
| [Ilyonectria_sp._MPI-CAGE-AT-0026]_KAH6985660.1   | RLYGA. | IERAGFGTAA | .....   | FAQL  | .....    | TT    | RY.  | ..... | MOEFN   | PATPD  | SPD    |
| [Ilyonectria_robusta]_XP_046104990.1              | RLYGA. | IERAGFGTAA | .....   | FAQL  | .....    | TT    | RY.  | ..... | MOEFN   | PATPD  | SPD    |
| [Dactylonectria_estremocensis]_KAH7149692.1       | RLYGA. | IERAGFGTAA | .....   | FAQL  | .....    | TT    | RY.  | ..... | MOEFN   | PATPD  | SPD    |
| [Dactylonectria_macrodidyma]_KAH7148923.1         | RLYGA. | IERAGFGTAA | .....   | FAQL  | .....    | TT    | RY.  | ..... | MOEFN   | PATPD  | SPD    |
| [Thelonectria_olida]_KAH6899778.1                 | RLYGA. | IERAGFGTAA | .....   | FAQL  | .....    | TT    | RY.  | ..... | MTDEFN  | ATPD   | DDP    |
| [Stachybotrys_chartarum_IBT_7711]_KEY69997.1      | KLYWA. | LERTGLGTAA | .....   | FAQL  | .....    | TT    | RY.  | ..... | LTEEFN  | SATKDI | IPG    |
| [Stachybotrys_chartarum_IBT_40293]_KFA50745.1     | KLYWA. | LERTGLGTAA | .....   | FAQL  | .....    | TT    | RY.  | ..... | LTEEFN  | SATKDI | IPG    |
| [Stachybotrys_chlorohalonata_IBT_40285]_KFA62815  | KLYWA. | LERTGLGTAA | .....   | FAQL  | .....    | TT    | RY.  | ..... | LTEEFN  | SATKDI | VPG    |
| [Purpureocillium_lilacinum]_XP_018174914.1        | RFLYL. | FRAAGLSTRA | .....   | FAQL  | .....    | TT    | RY.  | ..... | LADDFN  | ANPD   | DPA    |
| [Clonostachys_solani]_CAH0059244.1                | RLYGL. | IERAGLGTAA | .....   | FSQL  | .....    | TT    | RY.  | ..... | MTGTFN  | NATVRD | RDD    |
| [Clonostachys_rosea]_VUC36940.1                   | RLYGL. | IERAGFGTAA | .....   | FSQL  | .....    | TT    | RY.  | ..... | MTGTFN  | NATVRD | RDD    |
| [Clonostachys_rhizophaga]_CAH0026503.1            | RLYGL. | IERAGFGTAA | .....   | FSQL  | .....    | TT    | RY.  | ..... | MTGTFN  | NATVRD | RDD    |
| [Emericellopsis_atlantica]_XP_046114137.1         | KLYGL. | IERFGLGTAA | .....   | FAQL  | .....    | TT    | SY.  | ..... | MTKVFN  | PATPD  | SPS    |
| [Acremonium_chrysogenum_ATCC_11550]_KFH46845.1    | RLYGL. | LERAGLDTAA | .....   | FAQL  | .....    | TT    | SY.  | ..... | MTGTFN  | PATPD  | DRS    |
| [Pochonia_chlamydosporia_170]_XP_018148143.1      | RLYRL. | LERAGLSTSA | .....   | FSQL  | .....    | TT    | SY.  | ..... | MRDEFN  | RPTRD  | DEA    |
| [Epichloe_festucaae_F11]_QPG98063.1               | RLYGV. | LERAGLGTAA | .....   | FAQL  | .....    | TT    | GY.  | ..... | MTGTFN  | RNRD   | VDD    |
| [Colletotrichum_incanum]_KZ82863.1                | NLYGL. | IERAGLGTAA | .....   | FSQL  | .....    | TT    | QY.  | ..... | MEEFN   | PATPD  | NDE    |
| [Colletotrichum_simmonsii]_KXH39849.1             | NLYGL. | IERAGLGTAA | .....   | FEQL  | .....    | TT    | QY.  | ..... | MEEFN   | PATPD  | SER    |
| [Colletotrichum_sojae]_KAF6819546.1               | NLYGL. | IERAGLGTAA | .....   | FGQL  | .....    | TT    | QY.  | ..... | MEEFN   | PATPD  | SER    |
| [Bacillus_licheniformis]_CAB95850.2_RN2           | .....  | GTDP       | .....   | NQKI  | .....    | LY    | TSVS | ..... | .....   | .....  | .....  |
| [Trichosporon_asahii_var._asahii]_AGN98126.1_TaLi | GL     | .....      | .....   | ..... | .....    | ..... | DAE  | ..... | CPGCIDA | VPPSD  | VVI    |



## 2Z5G\_1 | Chains

[*Trichosporon asahii* var. *asahii*] AGN98126.1 TaLi

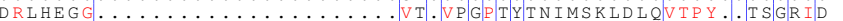

## 2Z5G\_1|Chains

## 2Z5G\_1|Chains

|                                                   |            |         |           |         |         |            |                    |
|---------------------------------------------------|------------|---------|-----------|---------|---------|------------|--------------------|
| 2550_1[Chains                                     | DRWLE      | NDGIVNT | VSMNGPKRG | SSDRIVP | YDGTLL  | KKGVDNDMGT | YNVDHLEIIG.....    |
| [Trichoderma harzianum]_ThaL                      | KREGE      | NDGLVSV |           | KSSRWG  | VYKGTLL |            | MGVSHLDLINWSNRARW  |
| [Trichoderma harzianum]_KKO99473.1                | KREGE      | NDGLVSV |           | KSSRWG  | VYKGTLL |            | MGVSHLDLINWSNRARW  |
| [Trichoderma guizhouense]_OPB43634.1              | KREGE      | NDGLVSV |           | KSSRWG  | VYKGTLL |            | MGVSHLDLINWSNRARW  |
| [Trichoderma simmonsii]_QYS94233.1                | KREGE      | NDGLVSV |           | KSSRWG  | VYKGTLL |            | MGVSHLDLINWSNRARW  |
| [Trichoderma harzianum CBS 226.95]_XP_024777038.1 | KREGE      | NDGLVSV |           | KSSRWG  | VYKGTLL |            | MGVSHLDLINWSNRARW  |
| [Trichoderma harzianum]_PKK42226.1                | KREGE      | NDGLVSV |           | KSSRWG  | VYKGTLL |            | MGVSHLDLINWSNRARW  |
| [Trichoderma lentiforme]_KAF3077685.1             | KREGE      | NDGLVSV |           | KSSRWG  | VYKGTLL |            | MGVSHLDLINWSNRARW  |
| [Trichoderma harzianum]_PNP59423.1                | KREGE      | NDGLVSV |           | KSSRWG  | VYKGTLL |            | MGVSHLDLINWSNRARW  |
| [Trichoderma virens FT-333]_UKZ73321.1            | RREGE      | NDGLVSV |           | ESSRWG  | MYKGTLL |            | MGVSHLDLINWSNRARW  |
| [Trichoderma virens Gv29-8]_XP_013960763.1        | RREGE      | NDGLVSV |           | ESSRWG  | MYKGTLL |            | MGVSHLDLINWSNRARW  |
| [Trichoderma asperellum CBS 433.97]_XP_024756506  | RAEGE      | NDGLVSV |           | ESSRWG  | VYQGTLL |            | MGVSHLDLINWSNRAAW  |
| [Trichoderma atroviride IMI 206040]_XP_013943551  | RAEGE      | NDGLVSV |           | ESSRWG  | VYRGTL  |            | MGVSHLDLINWSNRAAW  |
| [Trichoderma gamsii]_PNP38305.1                   | RAEGE      | NDGLVSV |           | ESSRWG  | VYRGTL  |            | MGVSHLDLINWSNRAAW  |
| [Trichoderma gamsii]_XP_018663207.1               | RAEGE      | NDGLVSV |           | ESSRWG  | VYRGTL  |            | MGVSHLDLINWSNRAAW  |
| [Trichoderma arundinaceum]_RFU75476.1             | KAEGE      | NDGLVSV |           | ESSRWG  | AYKGTLL |            | MGVSHLDLINWSNRAAW  |
| [Trichoderma gracile]_KAH0498535.1                | EKEGE      | NDGLVSV |           | RSSRWG  | EYKGTLL |            | VGVSHLDLINWSNRARW  |
| [Trichoderma reesei_QM6a]_XP_006968245.1          | EKEGE      | NDGLVSV |           | RSSRWG  | EYKGTLL |            | VGVSHLDLINWSNRARW  |
| [Trichoderma citrinoviride]_XP_024753310.1        | AAEGE      | NDGLVSV |           | ASSRWG  | VYKGTLL |            | VGVSHLDLINWSNRARW  |
| [Trichoderma longibrachiatum ATCC 18648]_PTB78011 | DREGE      | NDGLVSV |           | RSSRWG  | EYKGTLL |            | VGVSHLDLINWSNRARW  |
| [Hirsutella minnesotensis 3608]_KJZ78693.1        | EAEGP      | NDGLVSV |           | ESSRWG  | KYEGTL  |            | VGVSHLDLINWTKNRLRW |
| [Hirsutella rhossiliensis]_XP_044725020.1         | EAEGP      | NDGLVSV |           | DSSRWG  | IYEGTL  |            | VGVSHLDLINWTKNVRW  |
| [Ophiocordyceps sinensis CO18]_EQK99704.1         | EAEGP      | NDGLVSV |           | ASSRWG  | RYEGTL  |            | VGVSHLDLINWTKNLRW  |
| [Tolypocladium capitatum]_PNY29418.1              | EAEGP      | NDGLVSV |           | DSSRWG  | TYEGTL  |            | LGVS HLDLINWPNRVRW |
| [Tolypocladium ophioglossoides CBS 100239]_KND888 | EAEGP      | NDGLVSV |           | DSSRWG  | TYEGTL  |            | LGVS HLDLINWPNRVRW |
| [Tolypocladium paradoxum]_POR38551.1              | DVEGP      | NDGLVSV |           | DSSRWG  | TYEGTL  |            | LGVS HLDLINWPNRVRW |
| [Drechmeria coniospora]_ODA83100.1                | QAEGP      | NDGLVGV |           | DSSRWG  | QYEGTL  |            | LGVS HLDLINWSNRARW |
| [Drechmeria coniospora]_XP_040657415.1            | QAEGP      | NDGLVGV |           | DSSRWG  | QYEGTL  |            | LGVS HLDLINWSNRARW |
| [Ophiocordyceps unilateralis]_PFH57814.1          | QAEGP      | NDGLVSV |           | ESSRWG  | TYEGTL  |            | DGVSHLDLINWSNRLRW  |
| [Fusarium sp. AF-6]_RSL54391.1                    | KAEGP      | NDGLVSV |           | ESSHWG  | TYKGTLL |            | LGVS HLDLINWSNRMGW |
| [Fusarium kuroshium]_RMJ16314.1                   | KAEGP      | NDGLVSV |           | ESSHWG  | TYKGTLL |            | LGVS HLDLINWSNRMGW |
| [Fusarium sp. AF-8]_RSL70798.1                    | KAEGP      | NDGLVSV |           | ESSHWG  | TYKGTLL |            | LGVS HLDLINWSNRMGW |
| [Fusarium ambrosium]_RSM11997.1                   | KAEGP      | NDGLVSV |           | ESSHWG  | TYKGTLL |            | LGVS HLDLINWSNRMGW |
| [Fusarium floridanum]_RSL80024.1                  | KAEGP      | NDGLVSV |           | ESSHWG  | TYKGTLL |            | LGVS HLDLINWSNRMGW |
| [Fusarium vanettenii 77-13-4]_XP_003050716.1      | KAEGP      | NDGLVSV |           | ESSHWG  | TYKGTLL |            | LGVS HLDLINWSNRMGW |
| [Fusarium solani]_XP_046134414.1                  | KAEGP      | NDGLVSV |           | ESSHWG  | TYKGTLL |            | LGVS HLDLINWSNRMGW |
| [Fusarium albosuccineum]_KAF4468415.1             | QAEGP      | NDGLVSV |           | ESSHWG  | TYKGTLL |            | LGVS HLDLINWSNRMGW |
| [Fusarium decemcellulare]_KAF5011412.1            | QAEGP      | NDGLVSV |           | ESSHWG  | TYKGTLL |            | LGVS HLDLINWSNRMGW |
| [Fusarium sarcochrom]_KAF4964785.1                | QAEGP      | NDGLVSV |           | ESSQWG  | TYKGTLL |            | LGVS HLDLINWSNRMGW |
| [Fusarium avenaceum]_KAH6968652.1                 | QAEGP      | NDGLVSV |           | ESSHWG  | TYKGTLL |            | VGVSHLDLINWSNRMGW  |
| [Fusarium avenaceum]_KIL96274.1                   | QAEGP      | NDGLVSV |           | ESSHWG  | TYKGTLL |            | VGVSHLDLINWSNRMGW  |
| [Fusarium avenaceum]_KAG5656265.1                 | QAEGP      | NDGLVSV |           | ESSHWG  | TYKGTLL |            | VGVSHLDLINWSNRMGW  |
| [Fusarium tricinctum]_KAH7262197.1                | QAEGP      | NDGLVSV |           | ESSHWG  | TYKGTLL |            | VGVSHLDLINWSNRMGW  |
| [Fusarium heterosporum]_KAF5663380.1              | QAEGP      | NDGLVSV |           | ESSNMG  | TYKGTLL |            | VGVSHLDLINWSNRMGW  |
| [Fusarium sp. MPI-SDFR-AT-0072]_KAH7164412.1      | QAEGP      | NDGLVSV |           | ESSHWG  | TYKGTLL |            | LGVS HLDLINWSNRMGW |
| [Fusarium oxysporum f. sp. rapae]_KAG7414252.1    | QAEGP      | NDGLVSV |           | ESSHWG  | TYKGTLL |            | LGVS HLDLINWSNRMGW |
| [Fusarium mangiferae]_XP_041681833.1              | QAEGP      | NDGLVSV |           | ESSHWG  | TYKGTLL |            | LGVS HLDLINWSNRMGW |
| [Fusarium proliferatum]_CVL11341.1                | QAEGP      | NDGLVSV |           | ESSHWG  | TYKGTLL |            | LGVS HLDLINWSNRMGW |
| [Fusarium proliferatum ET1]_XP_031083673.1        | QAEGP      | NDGLVSV |           | ESSHWG  | TYKGTLL |            | LGVS HLDLINWSNRMGW |
| [Fusarium fujikuroi]_SCN78580.1                   | QAEGP      | NDGLVSV |           | ESSHWG  | TYKGTLL |            | LGVS HLDLINWSNRMGW |
| [Fusarium fujikuroi IMI 58289]_XP_023430709.1     | QAEGP      | NDGLVSV |           | ESSHWG  | TYKGTLL |            | LGVS HLDLINWSNRMGW |
| [Fusarium sp. NRRL 25303]_KAF5626228.1            | QAEGP      | NDGLVSV |           | ESSHWG  | TYKGTLL |            | LGVS HLDLINWSNRMGW |
| [Fusarium xylarioides]_KAG5746670.1               | QAEGP      | NDGLVSV |           | ESSHWG  | TYKGTLL |            | LGVS HLDLINWSNRMGW |
| [Fusarium xylarioides]_KAG5788219.1               | QAEGP      | NDGLVSV |           | ESSHWG  | TYKGTLL |            | LGVS HLDLINWSNRMGW |
| [Fusarium pseudocircinatum]_KAF5575212.1          | QAEGP      | NDGLVSV |           | ESSHWG  | TYKGTLL |            | LGVS HLDLINWSNRMGW |
| [Fusarium pseudoanthophilum]_KAF5575021.1         | QAEGP      | NDGLVSV |           | ESSHWG  | TYKGTLL |            | LGVS HLDLINWSNRMGW |
| [Fusarium verticillioides]_RBQ71412.1             | QAEGP      | NDGLVSV |           | ESSHWG  | TYKGTLL |            | LGVS HLDLINWSNRMGW |
| [Fusarium verticillioides 7600]_XP_018746479.1    | QAEGP      | NDGLVSV |           | ESSHWG  | TYKGTLL |            | LGVS HLDLINWSNRMGW |
| [Fusarium oxysporum NRRL 32931]_XP_031039788.1    | QAEGP      | NDGLVSV |           | ESSHWG  | TYKGTLL |            | LGVS HLDLINWSNRMGW |
| [Fusarium oxysporum f. sp. lycopersici 4287]_XP_0 | QAEGP      | NDGLVSV |           | ESSHWG  | TYKGTLL |            | LGVS HLDLINWSNRMGW |
| [Fusarium oxysporum f. sp. cepae]_RKK20771.1      | QAEGP      | NDGLVSV |           | ESSHWG  | TYKGTLL |            | LGVS HLDLINWSNRMGW |
| [Fusarium redolens]_XP_046051341.1                | QAEGP      | NDGLVSV |           | ESSHWG  | TYKGTLL |            | LGVS HLDLINWSNRMGW |
| [Fusarium austroafricanum]_KAF4458007.1           | QAEGP      | NDGLVSV |           | ESSHWG  | TYKGTLL |            | LGVS HLDLINWSNRMGW |
| [Fusarium flagelliforme]_XP_045986929.1           | QAEGP      | NDGLVSV |           | ESSHWG  | TYKGTLL |            | VGVSHLDLINWSNRMGW  |
| [Fusarium sp. FIESC RH6]_KAT1056250.1             | QAEGP      | NDGLVSV |           | ESSHWG  | TYKGTLL |            | LGVS HLDLINWSNRMGW |
| [Fusarium sporotrichioides]_RGP72309.1            | QAEGP      | NDGLVSV |           | ESSHWG  | TYKGTLL |            | LGVS HLDLINWSNRMGW |
| [Fusarium poae]_XP_044713592.1                    | QAEGP      | NDGLVSV |           | ESSHWG  | TYKGTLL |            | LGVS HLDLINWSNRMGW |
| [Fusarium venenatum]_XP_025590637.1               | QAEGP      | NDGLVSV |           | ESSHWG  | TYKGTLL |            | LGVS HLDLINWSNRMGW |
| [Fusarium pseudograminearum]_KAF0641638.1         | QAEGP      | NDGLVSV |           | ESSHWG  | TYKGTLL |            | LGVS HLDLINWSNRMGW |
| [Fusarium graminearum]_CAG1993854.1               | QAEGP      | NDGLVSV |           | ESSHWG  | TYKGTLL |            | LGVS HLDLINWSNRMGW |
| [Fusarium graminearum]_PCD31638.1                 | QAEGP      | NDGLVSV |           | ESSHWG  | TYKGTLL |            | LGVS HLDLINWSNRMGW |
| [Fusarium graminearum]_CZS78629.1                 | QAEGP      | NDGLVSV |           | ESSHWG  | TYKGTLL |            | LGVS HLDLINWSNRMGW |
| [Fusarium graminearum]_CAF3606094.1               | QAEGP      | NDGLVSV |           | ESSHWG  | TYKGTLL |            | LGVS HLDLINWSNRMGW |
| [Fusarium graminearum PH-1]_XP_011318944.1        | QAEGP      | NDGLVSV |           | ESSHWG  | TYKGTLL |            | LGVS HLDLINWSNRMGW |
| [Fusarium culmorum]_QPC68571.1                    | QAEGP      | NDGLVSV |           | ESSHWG  | TYKGTLL |            | LGVS HLDLINWSNRMGW |
| [Fusarium pseudograminearum]_QPC77441.1           | QAEGP      | NDGLVSV |           | ESSHWG  | TYKGTLL |            | LGVS HLDLINWSNRMGW |
| [Fusarium longipes]_RGP79158.1                    | QAEGP      | NDGLVSV |           | ESSHWG  | TYKGTLL |            | LGVS HLDLINWSNRMGW |
| [Ilyonectria destructans]_KAH7011941.1            | TEGEP      | NDGLVSV |           | ESSRWG  | TYKGTLL |            | LGVS HLDLINWSNRMGW |
| [Ilyonectria sp. MPI-CAGE-AT-0026]_KAH6985660.1   | TEGEP      | NDGLVSV |           | ESSRWG  | TYKGTLL |            | LGVS HLDLINWSNRMGW |
| [Ilyonectria robusta]_XP_046104990.1              | TEGEP      | NDGLVSV |           | ESSRWG  | TYKGTLL |            | LGVS HLDLINWSNRMGW |
| [Dactylonectria estremocensis]_KAH7149692.1       | AAEGP      | NDGLVSV |           | ESSRWG  | TYKGTLL |            | LGVS HLDLINWSNRMKW |
| [Dactylonectria macrodidyma]_KAH7148923.1         | AAEGP      | NDGLVSV |           | ESSRWG  | TYKGTLL |            | LDVSHLDLINWSNRMKW  |
| [Thelonectria olida]_KAH6899778.1                 | EAEGP      | NDGLVSV |           | DSSRWG  | TYKGTLL |            | VGVSHLDLINWSNRMW   |
| [Stachybotrys chartarum IBT 7711]_KEY69997.1      | QAEGP      | NDSLSV  |           | DSSRWG  | TYKGTLL |            | VGVSHLDLINWSNRMW   |
| [Stachybotrys chartarum IBT 40293]_KFA50745.1     | QAEGP      | NDSLSV  |           | DSSRWG  | TYKGTLL |            | VGVSHLDLINWSNRMW   |
| [Stachybotrys chlorohalonata IBT 40285]_KFA62815  | QAEGP      | NDSLSV  |           | DSSRWG  | TYKGTLL |            | IGVSHLDLINWSNRMW   |
| [Purpureocillium lilacinum]_XP_018174914.1        | EAEGA      | NDGLVSV |           | ESSRWG  | EYKGTLL |            | LGVS HLDLINWPNKVRW |
| [Clonostachys solani]_CAH0059244.1                | EAEGP      | NDGLVSV |           | ESSRWG  | TYKGTLL |            | VGVSHLDLINWSNRMW   |
| [Clonostachys rosea]_VUC36940.1                   | EAEGP      | NDGLVSV |           | ESSRWG  | TYKGTLL |            | VGVSHLDLINWSNRMW   |
| [Clonostachys rhizophaga]_CAH0026503.1            | EAEGP      | NDGLVSV |           | ESSRWG  | TYKGTLL |            | VDVSHLDLINWSNRMW   |
| [Emercillopsis atlantica]_XP_046114137.1          | KAEGA      | NDGLVAV |           | DSSCWG  | DYKGTLL |            | VGVSHLDLINWSNQVKW  |
| [Acremonium chrysogenum ATCC 11550]_KFH46845.1    | DAEGA      | NDGLVSV |           | ESSQWG  | AYRGTL  |            | VGVSHLDLINWSNRMW   |
| [Pochonia chlamydosporia 170]_XP_018148143.1      | EVEGP      | NDGLVSV |           | ESARWG  | AYQGTLL |            | LVGNHLDLINWPNRVRW  |
| [Epichloe festucae F11]_QPG98063.1                | RSQGA      | NDGLVSV |           | ESSRWG  | VYQGTLL |            | LDVNHLDLINWSNRMW   |
| [Colletotrichum incanum]_KZL82863.1               | EAEGA      | NDGLVSV |           | ASSRWG  | KYQGTLL |            | LDVSHLDLINWSNRLKW  |
| [Colletotrichum simmondsii]_KXH39849.1            | EAEGA      | NDGLVSV |           | ASSRWG  | KYKGTLL |            | LDVSHLDLINWSNRLKW  |
| [Colletotrichum sojae]_KAF6819546.1               | EVEGA      | NDGLVSV |           | HSSRWG  | DYKGTLL |            | LEVSHLDLINWSNRLW   |
| [Bacillus licheniformis]_CAB95850.2_RN2           | .....DLIVV | .....N  |           | SLRLI   | GARNVL  |            | IHGVTGTLT.SSQVKG   |
| [Trichosporon asahii var. asahii]_AGN98126.1_TaLi | EEGAK      | NIVLQDA |           | CPSDIA  | GHIGMA  |            | VDPNISMIIQWA.....  |

\*

\*

2Z5G\_1|Chains  
[Trichoderma harzianum]\_ThaL  
[Trichoderma harzianum]\_KKO99473.1  
[Trichoderma guizhouense]\_OPB843634.1  
[Trichoderma simmonsii]\_QYS94233.1  
[Trichoderma harzianum CBS 226.95]\_XP\_024777038.1  
[Trichoderma harzianum]\_PKK42226.1  
[Trichoderma lentiforme]\_KAF3077685.1  
[Trichoderma harzianum]\_PNP59423.1  
[Trichoderma virens FT-333]\_UKZ73321.1  
[Trichoderma virens Gv29-8]\_XP\_013960763.1  
[Trichoderma asperellum CBS 433.97]\_XP\_024756506.1  
[Trichoderma atroviride IMI 206040]\_XP\_013943551.1  
[Trichoderma gamsii]\_PNP38305.1  
[Trichoderma gamsii]\_XP\_018663207.1  
[Trichoderma arundinaceum]\_RFU75476.1  
[Trichoderma gracile]\_KAH0498535.1  
[Trichoderma reesei QM6a]\_XP\_006968245.1  
[Trichoderma citrinoviride]\_XP\_024753310.1  
[Trichoderma longibrachiatum ATCC 18648]\_PTB78011  
[Hirsutella minnesotensis 3608]\_KJZ78693.1  
[Hirsutella rhossiliensis XP\_044725020.1  
[Ophiocordyceps sinensis CO18]\_EQK99704.1  
[Tolypocladium capitatum]\_PNY29418.1  
[Tolypocladium ophioglossoides CBS 100239]\_KND888  
[Tolypocladium paradoxum]\_POR38551.1  
[Drechmeria coniospora]\_ODA83100.1  
[Drechmeria coniospora]\_XP\_040657415.1  
[Ophiocordyceps unilateralis]\_PFH57814.1  
[Fusarium sp. AF-6]\_RSL54391.1  
[Fusarium kuroshium]\_RMJ16314.1  
[Fusarium sp. AF-8]\_RSL70798.1  
[Fusarium ambrosium]\_RSM11997.1  
[Fusarium floridanum]\_RSL80024.1  
[Fusarium vanettenii 77-13-4]\_XP\_003050716.1  
[Fusarium solani]\_XP\_046134414.1  
[Fusarium albosuccineum]\_KAF4468415.1  
[Fusarium decemcellulare]\_KAF5011412.1  
[Fusarium sarcochroum]\_KAF4964785.1  
[Fusarium avenaceum]\_KAH6968652.1  
[Fusarium avenaceum]\_KIL96274.1  
[Fusarium avenaceum]\_KAG5656265.1  
[Fusarium tricinatum]\_KAH7262197.1  
[Fusarium heterosporum]\_KAF5663380.1  
[Fusarium sp. MPI-SDFR-AT-0072]\_KAH7164412.1  
[Fusarium oxysporum f. sp. rapae]\_KAG7414252.1  
[Fusarium mangiferae]\_XP\_041681833.1  
[Fusarium proliferatum]\_CVL11341.1  
[Fusarium proliferatum ETI]\_XP\_031083673.1  
[Fusarium fujikuroi]\_SCN78580.1  
[Fusarium fujikuroi IMI 58289]\_XP\_023430709.1  
[Fusarium sp. NRRL 25303]\_KAF5626228.1  
[Fusarium xylarioides]\_KAG5746670.1  
[Fusarium xylarioides]\_KAG5788219.1  
[Fusarium pseudocircinatum]\_KAF5575212.1  
[Fusarium pseudoanthophilum]\_KAF5575021.1  
[Fusarium verticillioides]\_RBQ71412.1  
[Fusarium verticillioides 7600]\_XP\_018746479.1  
[Fusarium oxysporum NRRL 32931]\_XP\_031039788.1  
[Fusarium oxysporum f. sp. lycopersici 4287]\_XP\_0  
[Fusarium oxysporum f. sp. cepae]\_RKK20771.1  
[Fusarium redolens]\_XP\_046051341.1  
[Fusarium austroafricanum]\_KAF4458007.1  
[Fusarium flagelliforme]\_XP\_045986929.1  
[Fusarium sp. FIESC RH6]\_KAI1056250.1  
[Fusarium sporotrichioides]\_RGP72309.1  
[Fusarium poae]\_XP\_044713592.1  
[Fusarium venenatum]\_XP\_025590637.1  
[Fusarium pseudograminearum]\_KAF0641638.1  
[Fusarium graminearum]\_CAG1993854.1  
[Fusarium graminearum]\_PCD31638.1  
[Fusarium graminearum]\_CZS78629.1  
[Fusarium graminearum]\_CAF3606094.1  
[Fusarium graminearum PH-1]\_XP\_011318944.1  
[Fusarium culmorum]\_QPC68571.1  
[Fusarium pseudograminearum]\_QPC77441.1  
[Fusarium longipes]\_RGP79158.1  
[Ilyonectria destructans]\_KAH7011941.1  
[Ilyonectria sp. MPI-CAGE-AT-0026]\_KAH6985660.1  
[Ilyonectria robusta]\_XP\_046104990.1  
[Dactylonectria estromecensis]\_KAH7149692.1  
[Dactylonectria macrodidyma]\_KAH7148923.1  
[Thelonectria olida]\_KAH6899778.1  
[Stachybotrys chartarum IBT 7711]\_KEY69997.1  
[Stachybotrys chartarum IBT 40293]\_KFA50745.1  
[Stachybotrys chlorohalonata IBT 40285]\_KFA62815.1  
[Purpureocillium lilacinum]\_XP\_018174914.1  
[Clonostachys solani]\_CAH0059244.1  
[Clonostachys rosea]\_VUC36940.1  
[Clonostachys rhizophaga]\_CAH0026503.1  
[Emericellopsis atlantica]\_XP\_046114137.1  
[Acromonium chrysogenum ATCC 11550]\_KFH46845.1  
[Pochonia chlamydosporia 170]\_XP\_018148143.1  
[Epichloe festucae Fl1]\_QFG98063.1  
[Colletotrichum incanum]\_KZL82863.1  
[Colletotrichum simmonsii]\_KXH39849.1  
[Colletotrichum sojae]\_KAF6819546.1  
[Bacillus licheniformis]\_CAB95850.2\_RN2  
[Trichosporon asahii var. asahii]\_AGN98126.1\_TaL

[illegible]



## 2Z5G\_1/Chains

## 2Z5G\_1|Chains

[Trichoderma harzianum]\_ThaL  
[Trichoderma harzianum]\_KKO99473.1  
[Trichoderma guizhouense]\_OPB43634.1  
[Trichoderma simmonsii]\_QYS94233.1  
[Trichoderma harzianum CBS 226.95]\_XP\_024777038.1  
[Trichoderma harzianum]\_PKK42226.1  
[Trichoderma lentiforme]\_KAF3077685.1  
[Trichoderma harzianum]\_PNP59423.1  
[Trichoderma virens FT-333]\_UKZ73321.1  
[Trichoderma virens Gv29-8]\_XP\_013960763.1  
[Trichoderma asperellum CBS 433.97]\_XP\_024756506.  
[Trichoderma atroviride IMI 206040]\_XP\_013943551.  
[Trichoderma gamsii]\_PNP38305.1  
[Trichoderma gamsii]\_XP\_018663207.1  
[Trichoderma arundinaceum]\_RFU75476.1  
[Trichoderma gracile]\_KAH0498535.1  
[Trichoderma reesei QM6a]\_XP\_006968245.1  
[Trichoderma citrinoviride]\_XP\_024753310.1  
[Trichoderma longibrachiatum ATCC 18648]\_PTB78011  
[Hirsutella minnesotensis 3608]\_KJZ78693.1  
[Hirsutella rhossiliensis]\_XP\_044725020.1  
[Ophiocordyceps sinensis CO18]\_EQK99704.1  
[Tolypocladium capitatum]\_PNY29418.1  
[Tolypocladium ophioglossoides CBS 100239]\_KND888  
[Tolypocladium paradoxum]\_POR38551.1  
[Drechmeria coniospora]\_ODA83100.1  
[Drechmeria coniospora]\_XP\_040657415.1  
[Ophiocordyceps unilateralis]\_PFH57814.1  
[Fusarium sp. AF-6]\_RSL54391.1  
[Fusarium kuroshium]\_RMJ16314.1  
[Fusarium sp. AF-8]\_RSL70798.1  
[Fusarium ambrosium]\_RSM11997.1  
[Fusarium floridanum]\_RSL80024.1  
[Fusarium vanettenii 77-13-4]\_XP\_003050716.1  
[Fusarium solani]\_XP\_046134414.1  
[Fusarium albosuccineum]\_KAF4468415.1  
[Fusarium decemcellulare]\_KAF5011412.1  
[Fusarium sarcochroum]\_KAF4964785.1  
[Fusarium avenaceum]\_KAH6968652.1  
[Fusarium avenaceum]\_KIL96274.1  
[Fusarium avenaceum]\_KAG5656265.1  
[Fusarium tricinctum]\_KAH7262197.1  
[Fusarium heterosporum]\_KAF5663380.1  
[Fusarium sp. MPI-SDFR-AT-0072]\_KAH7164412.1  
[Fusarium oxysporum f. sp. rapae]\_KAG7414252.1  
[Fusarium mangiferae]\_XP\_041681833.1  
[Fusarium proliferatum]\_CVL11341.1  
[Fusarium proliferatum ET1]\_XP\_031083673.1  
[Fusarium fujikuroi]\_SCN78580.1  
[Fusarium fujikuroi IMI 58289]\_XP\_023430709.1  
[Fusarium sp. NRRL 25303]\_KAF5626228.1  
[Fusarium xylarioides]\_KAG5746670.1  
[Fusarium xylarioides]\_KAG5788219.1  
[Fusarium pseudocircinatum]\_KAF5575212.1  
[Fusarium pseudoanthophilum]\_KAF5575021.1  
[Fusarium verticillioides]\_RBQ71412.1  
[Fusarium verticillioides 7600]\_XP\_018746479.1  
[Fusarium oxysporum NRRL 32931]\_XP\_031039788.1  
[Fusarium oxysporum f. sp. lycopersici 4287]\_XP\_0  
[Fusarium oxysporum f. sp. cepae]\_RKK20771.1  
[Fusarium redolens]\_XP\_046051341.1  
[Fusarium austroafricanum]\_KAF4458007.1  
[Fusarium flagelliforme]\_XP\_045986929.1  
[Fusarium sp. FIESC RH6]\_KAT1056250.1  
[Fusarium sporotrichioides]\_RGP72309.1  
[Fusarium poae]\_XP\_044713592.1  
[Fusarium venenatum]\_XP\_025590637.1  
[Fusarium pseudograminearum]\_KAF0641638.1  
[Fusarium graminearum]\_CAG1993854.1  
[Fusarium graminearum]\_PCD31638.1  
[Fusarium graminearum]\_CZS78629.1  
[Fusarium graminearum]\_CAF3606094.1  
[Fusarium graminearum PH-1]\_XP\_011318944.1  
[Fusarium culmorum]\_QPC68571.1  
[Fusarium pseudograminearum]\_QPC77441.1  
[Fusarium longipes]\_RGP79158.1  
[Ilyonectria destructans]\_KAH7011941.1  
[Ilyonectria sp. MPI-CAGE-AT-0026]\_KAH6985660.1  
[Ilyonectria robusta]\_XP\_046104990.1  
[Dactylonectria estremocensis]\_KAH7149692.1  
[Dactylonectria macrodidyma]\_KAH7148923.1  
[Thelonectria olida]\_KAH6899778.1  
[Stachybotrys chartarum IBT 7711]\_KEY69997.1  
[Stachybotrys chartarum IBT 40293]\_KFA50745.1  
[Stachybotrys chlorohalonata IBT 40285]\_KFA62815.  
[Purpureocillium lilacinum]\_XP\_018174914.1  
[Clonostachys solani]\_CAH0059244.1  
[Clonostachys rosea]\_VUC36940.1  
[Clonostachys rhizophaga]\_CAH0026503.1  
[Emericellopsis atlantica]\_XP\_046114137.1  
[Acronium chrysogenum ATCC 11550]\_KFH46845.1  
[Pochonia chlamydosporia 170]\_XP\_018148143.1  
[Epichloe festucae F11]\_QPG98063.1  
[Colletotrichum incanum]\_KZL82863.1  
[Colletotrichum simmondsii]\_KXH39849.1  
[Colletotrichum sojae]\_KAF6819546.1  
[Bacillus licheniformis]\_CAB95850.2\_RN2  
[Trichosporon asahii var. asahii]\_AGN98126.1\_TaLi

GIAEGRNRQQLTGIRGHSRSPDVSQKAPRRNTTST

GIGEGNRQHLTGIRGHSRSPDVSQKAPRRNTTST
