# Supplementary material for: Identification of a Novel Lipase with AHSMG Pentapeptide in Hypocreales and Glomerellales Filamentous Fungi
Source: MDPI journal article supplement (doi:10.3390/ijms23169367), 2022-08-19
Supplement: s1 [file s1]

# 2Z5G

|        | 1             | 10       | 20                  | 30                     |
|--------|---------------|----------|---------------------|------------------------|
| 2Z5G   | MM.....KCCR   | IMFVLLGL | ...WFVFGLSVFGGR     | ...T.....EAASLRANDA..  |
| ThaL   | MKQWPWHRGTR   | LPRSLLSL | QPSTLRVFSSTAKPLRHDP | IRDLGRLIHDDYATIRETYA.. |
| TaLipA | .....MRLSLVTA | ..AVA    | LSAATPIERA          | .....STSGINDYDCKA      |
| RN2    | .....MLSVSVF  | ..SFR    | PSASA               | .....                  |

|        | β1              | TT  | η1           | α1       | β2             |                 |            |
|--------|-----------------|-----|--------------|----------|----------------|-----------------|------------|
| 2Z5G   | 40              | 50  | 60           | 70       | 80             |                 |            |
| 2Z5G   | ...PVLHGF       | FWG | REE...MFGFKY | WGGV     | RGT...QWLNDNGY | RTY...TLAV      |            |
| ThaL   | ...TPKYPIVLAHGL | FGF | SELRV        | SPLPTIEY | WNG...IKQAL    | TANNCTVI...TATV |            |
| TaLipA | QPGKEPIVFLHGL   | LPA | .....PPGLN   | FLT      | ...KLPVF       | ASKGYCVF        | FAPTYGT    |
| RN2    | ...ASHNPVVMVHGI | GG  | .....ADYN    | F        | IG...IKSY      | LQSQGW          | .....TSSSE |

|        | α2 | β3    | α3      | β4          | η2     |         |
|--------|----|-------|---------|-------------|--------|---------|
| 2Z5G   | 90 | 100   | 110     | 120         | 130    |         |
| 2Z5G   | GP | LS    | SNWD    | .....RACEAY | AQ     | LVG     |
| ThaL   | PP | SG    | SIE     | .....RAAKL  | AAD    | ILACT   |
| TaLipA | IF | AGAKV | EDSSKEI | AGV         | .....V | DKVLAST |
| RN2    | LY | AIN   | FID     | KTGNN       | INNAP  | RLSEY   |

|        | β5       | α4       | α5    | η3    | β6   |    |
|--------|----------|----------|-------|-------|------|----|
| 2Z5G   | 140      | 150      | 160   | 170   | 180  |    |
| 2Z5G   | RGGR     | RIHIIAHS | QGGQT | ARM   | LVSL | LE |
| ThaL   | ...AVNII | AHSMG    | GLD   | ARYM  | ISL  | LR |
| TaLipA | ...KVN   | LV       | AHSMG | TLV   | AA   | Y  |
| RN2    | ...KV    | D        | LV    | AHSMG | GANT | LY |

|        | TT   | η4   | α6   | η5      | TT       |         |
|--------|------|------|------|---------|----------|---------|
| 2Z5G   | 200  | 210  | 220  | 230     | 240      |         |
| 2Z5G   | TPHD | GTT  | L    | VNMVDF  | TDRFFDLQ | KAVLEAA |
| ThaL   | TPHR | GSSF | ADY  | .....L  | VERGAG   | PLHLPRL |
| TaLipA | PVYN | GTT  | EASL | .....RL | .....LKQ | W       |
| RN2    | G    | ANRL | LV   | T       | .....    | .....   |

|        | α7    | α8    | α9     | α10    | TT       | β7    | β8      |
|--------|-------|-------|--------|--------|----------|-------|---------|
| 2Z5G   | 250   | 260   | 270    | 280    | 290      | 300   |         |
| 2Z5G   | S     | F     | DHYFER | LKRSPV | WSTDT    | ARYD  | LSVSGAE |
| ThaL   | A     | F     | GQLT   | TRYMR  | .....EEF | N     | PRVRD   |
| TaLipA | A     | F     | .....  | CPGC   | I        | DAVPP | S       |
| RN2    | ..... | ..... | .....  | NTAPQ  | N        | DKI   | .....   |

|        | β9    | TT     | α11   | α12   | η6    | η7    | η8    | TT    | β10   |
|--------|-------|--------|-------|-------|-------|-------|-------|-------|-------|
| 2Z5G   | 310   | 320    | 330   | 340   | 350   | 360   |       |       |       |
| 2Z5G   | NHYP  | ELGMNA | FSA   | VVCAP | FLG   | SYRNP | TLG   | ID    | DRWL  |
| ThaL   | ..... | .....  | ..... | ..... | ..... | ..... | ..... | ..... | ..... |
| TaLipA | ..... | .....  | ..... | ..... | ..... | ..... | ..... | ..... | ..... |
| RN2    | ..... | .....  | ..... | ..... | ..... | ..... | ..... | ..... | ..... |

|        | β11 | η9  | TT  | α13   |
|--------|-----|-----|-----|-------|
| 2Z5G   | 370 | 380 | 390 | 400   |
| 2Z5G   | D   | G   | L   | KKGV  |
| ThaL   | K   | C   | T   | ..... |
| TaLipA | I   | C   | M   | ..... |
| RN2    | V   | G   | L   | ..... |

2Z5G

|        |       |       |
|--------|-------|-------|
| 2Z5G   | L     | ASLQP |
| ThaL   | L     | AKEGL |
| TaLipA | ..... |       |
| RN2    | L     | TASGK |
