# Supplementary material for: Identification of a Novel Lipase with AHSMG Pentapeptide in Hypocreales and Glomerellales Filamentous Fungi
Source: MDPI journal article supplement (doi:10.3390/ijms23169367), 2022-08-19
Supplement: s1 [file s1]

$$\begin{array}{ccc} \eta^1 & & \alpha^1 \\ \text{---} \text{---} \text{---} & & \text{---} \text{---} \text{---} \\ 10 & 20 & \end{array}$$

|         |                       |  |  |                |        |   |      |  |          |
|---------|-----------------------|--|--|----------------|--------|---|------|--|----------|
|         | WPH.WRGTRLPR          |  |  |                | SLLSLQ |   |      |  | PST.LRV  |
|         | WPH.WRGTRLPR          |  |  |                | SLLSLQ |   |      |  | PST.SRV  |
|         | WPH.WRGTRLPR          |  |  |                | SLLSLQ |   |      |  | PST.SRV  |
|         | WPH.WRGTRLPR          |  |  |                | SLLSLQ |   |      |  | PSH.SRV  |
|         | WPH.WRGTRLPR          |  |  |                | SLLSLQ |   |      |  | PSA.SRV  |
|         | WPH.WRGTRLPR          |  |  |                | SLLSLQ |   |      |  | PSA.SRV  |
|         | WPH.WRGTRLPR          |  |  |                | SLLKLQ |   |      |  | PSP.SRV  |
|         | LLS                   |  |  |                |        |   |      |  |          |
|         | WRH.WRSSRLRA          |  |  |                | SLLNL  | R |      |  | SSP.SRV  |
|         | WRH.WRSSRLRV          |  |  |                | SLPNL  | R |      |  | SSP.SRV  |
|         | WLL.HRGPRLSR          |  |  |                | PPPNL  |   |      |  | SSS.HQL  |
|         | WLLHHRGPRLSR          |  |  |                | PLPNL  | R |      |  | SIPWHF   |
|         | WLLHYRGPRLSR          |  |  |                | LPPPNL | R |      |  | PS.HHF   |
|         | WLLHYRGPRLSR          |  |  |                | LPPPNL | R |      |  | PS.HHF   |
|         | WHT.YRGPRLSR          |  |  |                | SLPNL  | R |      |  | PSASYRF  |
|         | WPR.HHGPRLSR          |  |  |                | SLPNL  | R |      |  | RSR.ART  |
|         | WPR.HHGPRLSR          |  |  |                | SLPNL  | R |      |  | RSR.ART  |
|         | WPR.HHGPRLSR          |  |  |                | SLLNL  | R |      |  | PSRPRRA  |
|         | WPR.QYGRLTR           |  |  |                | SPPTL  | R |      |  | RSR.ARP  |
|         | CSPRAPAVSIHR.AAAAAARQ |  |  | SCRRPSC        | R      |   |      |  | PLL.V.RA |
|         |                       |  |  |                |        |   |      |  | TRA      |
| VGNSLAS | VHLRIPCKAICQ          |  |  | RRMHSKTTLLRSAC | R      |   |      |  | RPT.HRA  |
|         | WAPPHNILTLAG          |  |  | LRPQCR.HLPRPSC | R      |   |      |  | RRS      |
|         | WLPRYSTSTLAG          |  |  | RQPQCO.HLPHLSC |        |   |      |  | RR       |
|         | WLPRCNTPILAG          |  |  | RRPRRQ.HLPRPSC | R      |   |      |  | RRS      |
|         | IPWLTRYYSPPSLAAGRLRH  |  |  | STPAC          | R      |   |      |  | LRH.GRT  |
|         | IPWLTRYYSPPSLAAGRLRH  |  |  | STPAC          | R      |   |      |  | LRH.GRT  |
|         |                       |  |  | KCIIGSCLFARL   | PCASWP |   |      |  | SLSN.NRP |
|         | SAPLRRALILAS          |  |  | PRPSSL         |        |   | IQW  |  | LSIG.SRG |
|         | SAPLRRALILAS          |  |  | PRPSSS         |        |   | IQW  |  | LPIG.SRG |
|         | SAPLRRALILAS          |  |  | PRPSSS         |        |   | TQW  |  | LPIG.SRG |
|         | SAPLRRALILAS          |  |  | PRPSSS         |        |   | IQW  |  | LPIG.SRG |
|         | SAPLRRALILAS          |  |  | PRPSSS         |        |   | TQW  |  | LSIG.SRG |
|         | SALLRRALILAS          |  |  | PRPSSS         |        |   | IQW  |  | LPIV.SRG |
|         | SALLRRALTLAS          |  |  | PRLSSS         |        |   | TQW  |  | LPIV.SRG |
|         | STLWRRTPVLAL          |  |  | KNPPC          |        |   | AQW  |  | HPIP.RQA |
|         | STLWRRTPVLAL          |  |  | KNPPC          |        |   | AQW  |  | HPIP.RQA |
|         | SIIWRRAPTSAL          |  |  | TKEPC          | R      |   | AQW  |  | SPIA.RRS |
|         | STIWRKAPAFPL          |  |  | ARHTC          | R      |   | VQW  |  | HHVP.RRN |
|         | STIWRKAPAFPL          |  |  | ARHTC          | R      |   | VQW  |  | HHVP.RRN |
|         | STIWRKAPAFPL          |  |  | ARHTC          | R      |   | AQW  |  | HHVP.RRN |
|         | SKIWRKAPAFPR          |  |  | ARHTC          | H      |   | AQW  |  | HPVP.RRN |
|         | LIIWWRKAPAPPL         |  |  | ARHSC          | R      |   | AQW  |  | HTVS.RRN |
|         | SAIWRNAPASPL          |  |  | FRQLY          | R      |   | AQC  |  | HRS      |
|         | SAIWRNAPASPL          |  |  | FRQLY          | R      |   | AQC  |  | HRS      |
|         | SVIWRNAPDLLL          |  |  | SRQLY          | R      |   | AQW  |  | HRS      |
|         | SVIWRNAPDLLL          |  |  | SRQLY          | R      |   | AQW  |  | HRS      |
|         | SVIWRNAPDLLL          |  |  | SRQLY          | R      |   | AQW  |  | HRS      |
|         | SVIWRNAPDLLL          |  |  | SRQLY          | R      |   | AQW  |  | HRS      |
|         | SVIWRNAPDLLL          |  |  | SRQLY          | R      |   | AQW  |  | HRS      |
|         | SVIWRNAPDLLL          |  |  | SRQLY          | R      |   | AQW  |  | HRS      |
|         | SVIWRNAPTLP           |  |  | SQQLY          | R      |   | AQC  |  | HKK      |
|         | SVIWRNAPTLP           |  |  | SQQLY          | R      |   | AQC  |  | HKK      |
|         | MWRSAPALPL            |  |  | SRQLYG         |        |   | ARC  |  | HRS      |
|         | SVIWRSAPALPL          |  |  | SRQLYG         |        |   | AQC  |  | HRS      |
|         | SVIWRSAPALPL          |  |  | SRQLYG         |        |   | VQC  |  | HRS      |
|         | SVIWRSAPALPL          |  |  | SRQLYG         |        |   | AQC  |  | HRS      |
|         | SAIWRNAPASPL          |  |  | SRQLY          | R      |   | AQC  |  | HRS      |
|         | SAIWRNAPASPL          |  |  | SRQLY          | R      |   | AQC  |  | HRS      |
|         | SAIWRNAPASPL          |  |  | SRQLY          | R      |   | AQC  |  | HRS      |
|         | SAIWRNAPASPL          |  |  | SRQLY          | R      |   | AQC  |  | HRS      |
|         | SIIRRNAPTSPL          |  |  | SRQLY          | R      |   | AQC  |  | HRS      |
|         | SRTWRKAPASAL          |  |  | GRLLY          | H      |   | AQWH |  | HPVS.RRT |
|         | STIWRKAPALS           |  |  | IKYPY          | R      |   | KQP  |  | FLLQ.CRG |
|         | STIWRKAPALGL          |  |  | VRYPY          | H      |   | KQP  |  | FLLQ.CRS |
|         | STIWRKAPAPTL          |  |  | VKYSY          | R      |   | KQP  |  | FITQ.CRS |
|         | STIWRNAPASTL          |  |  | VRYTY          | R      |   |      |  |          |

[Trichoderma harzianum]\_ThaL  
[Trichoderma harzianum]\_KKO99473.1  
[Trichoderma guizhouense]\_OPB43634.1  
[Trichoderma simmonsii]\_QYS94233.1  
[Trichoderma harzianum CBS\_226.95]\_XP\_024777038.1  
[Trichoderma harzianum]\_PKK42226.1  
[Trichoderma lentiforme]\_KAF3077685.1  
[Trichoderma harzianum]\_PNP59423.1  
[Trichoderma virens FT-333]\_UKZ73321.1  
[Trichoderma virens Gv29-8]\_XP\_013960763.1  
[Trichoderma asperellum CBS\_433.97]\_XP\_024756506.1  
[Trichoderma atroviride IMI\_206040]\_XP\_013943551.1  
[Trichoderma gamsii]\_PNP38305.1  
[Trichoderma gamsii]\_XP\_018663207.1  
[Trichoderma arundinaceum]\_REFU75476.1  
[Trichoderma gracile]\_KAH0498535.1  
[Trichoderma reesei QM6a]\_XP\_006968245.1  
[Trichoderma citrinoviride]\_XP\_024753310.1  
[Trichoderma longibrachiatum ATCC\_18648]\_PTB78011  
[Hirsutella minnesotensis 3608]\_KJZ78693.1  
[Hirsutella rhossiliensis]\_XP\_044725020.1  
[Ophiocordyceps sinensis C018]\_EQK99704.1  
[Tolypocladium capitatum]\_PNY29418.1  
[Tolypocladium ophioglossoides CBS\_100239]\_KND888  
[Tolypocladium paradoxum]\_POR38551.1  
[Drechmeria coniospora]\_ODA83100.1  
[Drechmeria coniospora]\_XP\_040657415.1  
[Ophiocordyceps unilateralis]\_PFH57814.1  
[Fusarium sp. AF-6]\_RSL54391.1  
[Fusarium kuroshium]\_RMJ16314.1  
[Fusarium sp. AF-8]\_RSL70798.1  
[Fusarium ambrosium]\_RSM11997.1  
[Fusarium floridanum]\_RSL80024.1  
[Fusarium vanettenii 77-13-4]\_XP\_003050716.1  
[Fusarium solani]\_XP\_046134414.1  
[Fusarium albosuccineum]\_KAF4468415.1  
[Fusarium decemcellulare]\_KAF5011412.1  
[Fusarium sarcochromum]\_KAF4964785.1  
[Fusarium avenaceum]\_KAH6968652.1  
[Fusarium avenaceum]\_KIL96274.1  
[Fusarium avenaceum]\_KAG5656265.1  
[Fusarium tricinctum]\_KAH7262197.1  
[Fusarium heterosporum]\_KAF5663380.1  
[Fusarium sp. MPI-SDFR-AT-0072]\_KAH7164412.1  
[Fusarium oxysporum f. sp. rapae]\_KAG7414252.1  
[Fusarium mangiferae]\_XP\_041681833.1  
[Fusarium proliferatum]\_CVL11341.1  
[Fusarium proliferatum FT1]\_XP\_031083673.1  
[Fusarium fujikuroi]\_SCN78580.1  
[Fusarium fujikuroi IMI\_58289]\_XP\_023430709.1  
[Fusarium sp. NRRL\_25303]\_KAF5626228.1  
[Fusarium xylarioides]\_KAG5746670.1  
[Fusarium xylarioides]\_KAG5788219.1  
[Fusarium pseudocircinatum]\_KAF5575212.1  
[Fusarium pseudoanthophilum]\_KAF5575021.1  
[Fusarium verticillioides]\_RBQ71412.1  
[Fusarium verticillioides 7600]\_XP\_018746479.1  
[Fusarium oxysporum NRRL\_32931]\_XP\_031039788.1  
[Fusarium oxysporum f. sp. lycopersici 4287]\_XP\_0  
[Fusarium oxysporum f. sp. cepae]\_RKK20771.1  
[Fusarium redolens]\_XP\_046051341.1  
[Fusarium austroafricanum]\_KAF4458007.1  
[Fusarium flagelliforme]\_XP\_045986929.1  
[Fusarium sp. FIESC RH6]\_KAI1056250.1  
[Fusarium sporotrichioides]\_RGP72309.1  
[Fusarium poae]\_XP\_044713592.1  
[Fusarium venenatum]\_XP\_025590637.1  
[Fusarium pseudograminearum]\_KAF0641638.1  
[Fusarium graminearum]\_CAG1993854.1  
[Fusarium graminearum]\_PCD31638.1  
[Fusarium graminearum]\_CZS78629.1  
[Fusarium graminearum]\_CAF3606094.1  
[Fusarium graminearum PH-1]\_XP\_011318944.1  
[Fusarium culmorum]\_QPC68571.1  
[Fusarium pseudograminearum]\_QPC77441.1  
[Fusarium longipes]\_RGP79158.1  
[Ilyonectria destructans]\_KAH7011941.1  
[Ilyonectria sp. MPI-CAGE-AT-0026]\_KAH6985660.1  
[Ilyonectria robusta]\_XP\_046104990.1  
[Dactylonectria estremocensis]\_KAH7149692.1  
[Dactylonectria macrodidyma]\_KAH7148923.1  
[Thelonectria olida]\_KAH6899778.1  
[Stachybotrys chartarum IBT\_7711]\_KEY69997.1  
[Stachybotrys chartarum IBT\_40293]\_KFA50745.1  
[Stachybotrys chlorohalonata IBT\_40285]\_KFA62815.1  
[Purpureocillium lilacinum]\_XP\_018174914.1  
[Clonostachys solani]\_CAH0059244.1  
[Clonostachys rosea]\_VUC36940.1  
[Clonostachys rhizophaga]\_CAH0026503.1  
[Emericellopsis atlantica]\_XP\_046114137.1  
[Acremonium chrysogenum ATCC\_11550]\_KFH46845.1  
[Pochonia chlamydosporia 170]\_XP\_018148143.1  
[Epichloe festucae F11]\_QPG98063.1  
[Colletotrichum incanum]\_KZL82863.1  
[Colletotrichum simmonsii]\_KXH39849.1  
[Colletotrichum sojae]\_KAF6819546.1

[illegible]



| [ <i>Trichoderma harzianum</i> ] <i>ThaL</i>                             | β1 |    |    |    |     |     |     |     |     |     | α2  |     |     |     |     |     |     |     |     |     | η2  |     |     |     |     |     |     |     |     |     | β2  |     |     |     |     |     |     |     |     |     | α1  |     |     |     |     |   |   |   |   |   |   |   |   |   |   |   |   |   |
|--------------------------------------------------------------------------|----|----|----|----|-----|-----|-----|-----|-----|-----|-----|-----|-----|-----|-----|-----|-----|-----|-----|-----|-----|-----|-----|-----|-----|-----|-----|-----|-----|-----|-----|-----|-----|-----|-----|-----|-----|-----|-----|-----|-----|-----|-----|-----|-----|---|---|---|---|---|---|---|---|---|---|---|---|---|
|                                                                          | 60 | 70 | 80 | 90 | 100 | 110 | 120 | 130 | 140 | 150 | 160 | 170 | 180 | 190 | 200 | 210 | 220 | 230 | 240 | 250 | 260 | 270 | 280 | 290 | 300 | 310 | 320 | 330 | 340 | 350 | 360 | 370 | 380 | 390 | 400 | 410 | 420 | 430 | 440 | 450 | 460 | 470 | 480 | 490 | 500 |   |   |   |   |   |   |   |   |   |   |   |   |   |
| [ <i>Trichoderma harzianum</i> ] <i>ThaL</i>                             | P  | K  | Y  | P  | I   | V   | L   | A   | H   | G   | L   | F   | G   | F   | S   | E   | L   | R   | V   | S   | P   | .   | L   | I   | P   | T   | E   | Y   | W   | N   | G   | I   | K   | Q   | A   | L   | T   | A   | .   | N   | N   | C   | T   | .   | V   | I | T | A | T | V | P | P | S | G | S | T | E | E |
| [ <i>Trichoderma harzianum</i> ] <i>KKO99473.1</i>                       | P  | K  | Y  | P  | I   | V   | L   | A   | H   | G   | L   | F   | G   | F   | S   | E   | L   | R   | V   | S   | P   | .   | L   | I   | P   | T   | E   | Y   | W   | N   | G   | I   | K   | Q   | A   | L   | T   | A   | .   | N   | N   | C   | T   | .   | V   | I | T | A | T | V | P | P | S | G | S | T | E | E |
| [ <i>Trichoderma guizhouense</i> ] <i>OPB43634.1</i>                     | P  | K  | Y  | P  | I   | V   | L   | A   | H   | G   | L   | F   | G   | F   | S   | E   | L   | R   | V   | S   | P   | .   | L   | I   | P   | T   | E   | Y   | W   | N   | G   | I   | K   | Q   | A   | L   | T   | A   | .   | N   | N   | C   | T   | .   | V   | I | T | A | T | V | P | P | S | G | S | T | E | E |
| [ <i>Trichoderma simmonsii</i> ] <i>QY954233.1</i>                       | P  | K  | Y  | P  | I   | V   | L   | A   | H   | G   | L   | F   | G   | F   | S   | E   | L   | R   | V   | S   | P   | .   | L   | I   | P   | T   | E   | Y   | W   | N   | G   | I   | K   | Q   | A   | L   | T   | A   | .   | N   | N   | C   | T   | .   | V   | I | T | A | T | V | P | P | S | G | S | T | E | E |
| [ <i>Trichoderma harzianum</i> ] <i>CBS 226.95</i> <i>XP_024777038.1</i> | P  | K  | Y  | P  | I   | V   | L   | A   | H   | G   | L   | F   | G   | F   | S   | E   | L   | R   | V   | S   | P   | .   | L   | I   | P   | T   | E   | Y   | W   | N   | G   | I   | K   | Q   | A   | L   | T   | A   | .   | N   | N   | C   | T   | .   | V   | I | T | A | T | V | P | P | S | G | S | T | E | E |
| [ <i>Trichoderma harzianum</i> ] <i>PKK42226.1</i>                       | P  | K  | Y  | P  | I   | V   | L   | A   | H   | G   | L   | F   | G   | F   | S   | E   | L   | R   | V   | S   | P   | .   | L   | I   | P   | T   | E   | Y   | W   | N   | G   | I   | K   | Q   | A   | L   | T   | A   | .   | N   | N   | C   | T   | .   | V   | I | T | A | T | V | P | P | S | G | S | T | E | E |
| [ <i>Trichoderma lentiforme</i> ] <i>KAF3077685.1</i>                    | P  | K  | Y  | P  | I   | V   | L   | A   | H   | G   | L   | F   | G   | F   | S   | E   | L   | R   | V   | S   | P   | .   | L   | I   | P   | T   | E   | Y   | W   | N   | G   | I   | K   | Q   | A   | L   | T   | A   | .   | N   | N   | C   | T   | .   | V   | I | T | A | T | V | P | P | S | G | S | T | E | E |
| [ <i>Trichoderma harzianum</i> ] <i>PNP59423.1</i>                       | P  | T  | Y  | P  | I   | V   | L   | A   | H   | G   | L   | F   | G   | F   | S   | E   | L   | R   | V   | S   | P   | .   | L   | I   | P   | T   | E   | Y   | W   | N   | G   | I   | K   | Q   | A   | L   | T   | A   | .   | N   | N   | C   | T   | .   | V   | I | T | A | T | V | P | P | S | G | S | T | E | E |
| [ <i>Trichoderma virens</i> ] <i>FT-333</i> <i>UK273321.1</i>            | P  | K  | Y  | P  | I   | V   | L   | A   | H   | G   | L   | F   | G   | F   | S   | E   | L   | R   | V   | S   | P   | .   | L   | I   | P   | T   | E   | Y   | W   | N   | G   | I   | K   | Q   | A   | L   | T   | A   | .   | N   | N   | C   | T   | .   | V   | I | T | A | T | V | P | P | S | G | S | T | E | E |
| [ <i>Trichoderma virens</i> ] <i>Gv29-8</i> <i>XP_013960763.1</i>        | P  | K  | Y  | P  | I   | V   | L   | A   | H   | G   | L   | F   | G   | F   | S   | E   | L   | R   | V   | S   | P   | .   | L   | I   | P   | T   | E   | Y   | W   | N   | G   | I   | K   | Q</ |     |     |     |     |     |     |     |     |     |     |     |   |   |   |   |   |   |   |   |   |   |   |   |   |

|                                                    | $\alpha 3$     |                                           | $\eta 3$                   |     |
|----------------------------------------------------|----------------|-------------------------------------------|----------------------------|-----|
| [Trichoderma harzianum]_ThaL                       | 0000000        | TT                                        | 2.....22                   | -   |
|                                                    | 120            | 130                                       | 140                        |     |
| [Trichoderma harzianum]_ThaL                       | RAAKKLAADTLAQT | TTA...ASLPSA                              | .....QDADGHATT             | FP  |
| [Trichoderma harzianum]_KKO99473.1                 | RAAKKLAADTLAQT | TTA...ASLPSA                              | .....QDADGHATT             | FP  |
| [Trichoderma guizhouense]_OPB43634.1               | RAAKKLAADTLAQT | TTA...ASLPSA                              | .....QDG.....              | FP  |
| [Trichoderma simmonsii]_QYS94233.1                 | RAAKKLAADTLAQT | TTA...ASLPDS                              | .....QDADG.....            | FP  |
| [Trichoderma harzianum]_CBS 226.95]_XP_024777038.1 | RAAKKLAADTLAQT | TTA...ASLPSA                              | .....QDAEGHA.....          | FP  |
| [Trichoderma harzianum]_PKK42226.1                 | RAAKKLAADTLAQT | TTA...ASLPSA                              | .....QDAEGHA.....          | FP  |
| [Trichoderma lentiforme]_KAF3077685.1              | RAAKKLAADTLAQT | TTA...ASLPSA                              | .....QDADGHATT             | FP  |
| [Trichoderma harzianum]_PNP59423.1                 | RAAKKLAADTLAQT | TTA...ASLPS                               | .....ADGHA.....            | TP  |
| [Trichoderma virens]_FT-333]_UKZ73321.1            | RAAKKLAADTLAQT | TTA...SSLSA                               | .....HDGK.....             | FP  |
| [Trichoderma virens]_Gv29-8]_XP_013960763.1        | RAAKKLAADTLAQT | TTA...SSLSA                               | .....HDGQ.....             | FP  |
| [Trichoderma asperellum]_CBS 433.97]_XP_024756506. | RAAKKLAADTLAQT | STST.....H.....                           | .....KEHA.....             | APT |
| [Trichoderma atroviride]_IMI 206040]_XP_013943551. | RAAKKLAADTLAQT | STSR.....D.....                           | .....ERDA.....             | FT  |
| [Trichoderma gamsii]_PNP38305.1                    | RAAKKLAADTLAQT | STSR.....D.....                           | .....KHE.....              | FT  |
| [Trichoderma gamsii]_XP_018663207.1                | RAAKKLAADTLAQT | STSR.....D.....                           | .....KHE.....              | FT  |
| [Trichoderma arundinaceum]_RFU75476.1              | RAAKKLAADTLAQT | STSR.....D.....                           | .....RNGQ.....             | APT |
| [Trichoderma gracile]_KAH0498535.1                 | RAEKLAADTLAQT  | STSA...AAAPSLIDS                          | .....DHNNNNNRALRHNGGQNGQE  | TP  |
| [Trichoderma reesei]_QM6a]_XP_006968245.1          | RAEKLAADTLAQT  | STSA...STCHS                              | .....NNNNNNNNKNTNDRDSRL    | TP  |
| [Trichoderma citrinoviride]_XP_024753310.1         | RAEKLAADTLAQN  | QNS.....                                  | .....                      | TP  |
| [Trichoderma longibrachiatum]_ATCC 18648]_PTB78011 | RAEKLAADTLAQT  | SL.....S.....                             | .....NRDDKKLVDRDGGRGQGEANS | SP  |
| [Hirsutella minnesotensis]_3608]_KJZ78693.1        | RAAKKLAQDIAAC  | PCPQASSSGP                                | .....GAGNG                 | FVP |
| [Hirsutella rhossiliensis]_XP_044725020.1          | RAAKKLAADIAAF  | FP...SSPAP                                | .....RTGEG                 | TV  |
| [Ophiocordyceps sinensis]_CO18]_EQK99704.1         | RAAKKLAADMAA   | ALSS...S...P                              | .....RAAQG                 | IS  |
| [Tolypocladium capitatum]_PNY29418.1               | RAAKKLAADIAAD  | TSAS...SDPSP                              | .....SPGRP                 | TP  |
| [Tolypocladium ophioglossoides]_CBS 100239]_KND888 | RAAKKLAADIAA   | ASAF...DPSP                               | .....SPSR                  | TP  |
| [Tolypocladium paradoxum]_POR38551.1               | RAAKKLAADIAA   | ASSS...GT.....                            | .....                      | TP  |
| [Drechmeria coniospora]_ODA83100.1                 | RAAKKLAADISA   | SIAS...SKFSG                              | .....                      | D   |
| [Drechmeria coniospora]_XP_040657415.1             | RAAKKLAADISA   | SIAS...SKFSG                              | .....                      | D   |
| [Ophiocordyceps unilateralis]_PFH57814.1           | RAAKKLAADTAT   | ARS.....                                  | .....                      | P   |
| [Fusarium sp.]_AF-6]_RSL54391.1                    | RAAALRSALAE    | AHAPA                                     | .....                      | PA  |
| [Fusarium kuroshium]_RMJ16314.1                    | RAAALRSALAE    | AHAPA                                     | .....                      | PA  |
| [Fusarium sp.]_AF-8]_RSL70798.1                    | RAAALRSALAE    | AHAPA                                     | .....                      | PA  |
| [Fusarium ambrosium]_RSM11997.1                    | RAAALRSALAE    | AHAPA                                     | .....                      | PA  |
| [Fusarium floridanum]_RSL80024.1                   | RAAALRSALAE    | AHAPA                                     | .....                      | PA  |
| [Fusarium vanettenii]_77-13-4]_XP_003050716.1      | RAAALRSALAE    | AHAPA                                     | .....                      | PA  |
| [Fusarium solani]_XP_046134414.1                   | RAAALRSALAE    | AHAPA                                     | .....                      | PA  |
| [Fusarium albosuccineum]_KAF4468415.1              | RAAALRTALAE    | SHAPA                                     | .....                      | PA  |
| [Fusarium decemcellulare]_KAF5011412.1             | RAAALRTALAE    | SHAPA                                     | .....                      | PA  |
| [Fusarium sarcochroum]_KAF4964785.1                | RAAALRSALAE    | AHAPA                                     | .....                      | PA  |
| [Fusarium avenaceum]_KAH6968652.1                  | RAAALRSALAE    | AQSPA                                     | .....                      | PA  |
| [Fusarium avenaceum]_KIL96274.1                    | RAAALRSALAE    | AQSPA                                     | .....                      | PA  |
| [Fusarium avenaceum]_KAG5656265.1                  | RAAALRSALAE    | AQSPA                                     | .....                      | PA  |
| [Fusarium tricinatum]_KAH7262197.1                 | RAAALRSALAE    | AQSPA                                     | .....                      | PA  |
| [Fusarium heterosporum]_KAF5663380.1               | RAAALRSALAE    | AHTPA                                     | .....                      | LE  |
| [Fusarium sp.]_MPI-SDFR-AT-0072]_KAH7164412.1      | RAAALRSALAE    | AHAPM                                     | .....                      | HE  |
| [Fusarium oxysporum]_f. sp. rapae]_KAG7414252.1    | RAAALRSALAE    | AHAPM                                     | .....                      | HE  |
| [Fusarium mangiferae]_XP_041681833.1               | RATALRSALAE    | AHAPM                                     | .....                      | PE  |
| [Fusarium proliferatum]_CVL11341.1                 | RATALRSALAE    | AHAPM                                     | .....                      | PE  |
| [Fusarium proliferatum]_ET1]_XP_031083673.1        | RATALRSALAE    | AHAPM                                     | .....                      | PE  |
| [Fusarium fujikuroi]_SCN78580.1                    | RATALRSALAE    | AHAPM                                     | .....                      | PE  |
| [Fusarium fujikuroi]_IMI 58289]_XP_023430709.1     | RATALRSALAE    | AHAPM                                     | .....                      | PE  |
| [Fusarium sp.]_NRRL 25303]_KAF5626228.1            | RATALRSALAE    | AHAPM                                     | .....                      | PE  |
| [Fusarium xylarioides]_KAG5746670.1                | RATALRSALAE    | AHAPM                                     | .....                      | PE  |
| [Fusarium xylarioides]_KAG5788219.1                | RATALRSALAE    | AHAPM                                     | .....                      | PE  |
| [Fusarium pseudocircinatum]_KAF5575212.1           | RATALRSALAE    | AHAPM                                     | .....                      | PE  |
| [Fusarium pseudoanthophilum]_KAF5575021.1          | RATALRSALAE    | AHAPM                                     | .....                      | PE  |
| [Fusarium verticillioides]_RBQ71412.1              | RATALRSALAE    | AHAPM                                     | .....                      | PE  |
| [Fusarium verticillioides]_7600]_XP_018746479.1    | RATALRSALAE    | AHAPM                                     | .....                      | PE  |
| [Fusarium oxysporum]_NRRL 32931]_XP_031039788.1    | RATALRSALAE    | ALAPM                                     | .....                      | Q   |
| [Fusarium oxysporum]_f. sp. lycopersici 4287]_XP_0 | RATALRSALAE    | ALAPM                                     | .....                      | Q   |
| [Fusarium oxysporum]_f. sp. cepae]_RKK20771.1      | RATALRSALAE    | ALAPM                                     | .....                      | Q   |
| [Fusarium redolens]_XP_046051341.1                 | RAAALRSALAE    | AHAPM                                     | .....                      | PE  |
| [Fusarium austroafricanum]_KAF4458007.1            | RAAALRSALAE    | AYAPM                                     | .....                      | PE  |
| [Fusarium flagelliforme]_XP_045986929.1            | RAAALRSALAE    | AHAPA                                     | .....                      | PE  |
| [Fusarium sp.]_FIESC RH6]_KAT1056250.1             | RAAALRSALAE    | AHAPA                                     | .....                      | PE  |
| [Fusarium sporotrichioides]_RGP72309.1             | RAAALRSALAE    | AHAPA                                     | .....                      | PE  |
| [Fusarium poae]_XP_044713592.1                     | RAAALRSALAE    | AHAPV                                     | .....                      | PE  |
| [Fusarium venenatum]_XP_025590637.1                | RAAALRSALAE    | AHAPV                                     | .....                      | PE  |
| [Fusarium pseudograminearum]_KAF0641638.1          | RAAALRSALAE    | AHAPA                                     | .....                      | PE  |
| [Fusarium graminearum]_CAG1993854.1                | RAAALRSALAE    | AHAPA                                     | .....                      | PE  |
| [Fusarium graminearum]_PCD31638.1                  | RAAALRSALAE    | AHAPA                                     | .....                      | PE  |
| [Fusarium graminearum]_CZS78629.1                  | RAAALRSALAE    | AHAPA                                     | .....                      | PE  |
| [Fusarium graminearum]_CAF3606094.1                | RAAALRSALAE    | AHAPA                                     | .....                      | PE  |
| [Fusarium graminearum]_PH-1]_XP_011318944.1        | RAAALRSALAE    | AHAPA                                     | .....                      | PE  |
| [Fusarium culmorum]_QPC68571.1                     | RAAALRSALAE    | AHAPA                                     | .....                      | PE  |
| [Fusarium pseudograminearum]_QPC77441.1            | RAAALRSALAE    | AHAPA                                     | .....                      | PE  |
| [Fusarium longipes]_RGP79158.1                     | RAAALRSALAE    | AHAPV                                     | .....                      | PE  |
| [Ilyonectria destructans]_KAH7011941.1             | RAAALHAAIAE    | CAPA                                      | .....                      | PD  |
| [Ilyonectria sp.]_MPI-CAGE-AT-0026]_KAH6985660.1   | RAAALHAAIAE    | CAPA                                      | .....                      | PD  |
| [Ilyonectria robusta]_XP_046104990.1               | RAAALHAAIAE    | CAPA                                      | .....                      | PD  |
| [Dactylonectria estremocensis]_KAH7149692.1        | RAAALHAAIAE    | CDPK                                      | .....                      | PE  |
| [Dactylonectria macrodidyma]_KAH7148923.1          | RAAALHAAIAE    | CEPK                                      | .....                      | PE  |
| [Thelonectria olida]_KAH6899778.1                  | RAAALHDAIAE    | CSPM                                      | .....                      | PE  |
| [Stachybotrys chartarum]_IBT 7711]_KEY69997.1      | RAAKKLGAIAA    | QAPP                                      | .....                      | NV  |
| [Stachybotrys chartarum]_IBT 40293]_KFA50745.1     | RAAKKLGAIAA    | QAPP                                      | .....                      | NV  |
| [Stachybotrys chlorohalonata]_IBT 40285]_KFA62815. | RAAKKLGAIAA    | QAPP                                      | .....                      | NV  |
| [Purpureocillium lilacinum]_XP_018174914.1         | RAAKKLAVEISS   | ALLSS...SSSSSSVASSSPFPASRGSSG.AADVARGDDDT | .....                      | RT  |
| [Clonostachys solani]_CAH0059244.1                 | RAASLRDQIAA    | AR.....                                   | .....                      | FS  |
| [Clonostachys rosea]_VUC36940.1                    | RAASLRDHITA    | AR.....                                   | .....                      | FS  |
| [Clonostachys rhizophaga]_CAH0026503.1             | RAASLRDQIAA    | AR.....                                   | .....                      | FS  |
| [Emericellopsis atlantica]_XP_046114137.1          | RAAKKLREDIDA   | AAAST...TR.....                           | .....                      | DGR |
| [Acremonium chrysogenum]_ATCC 11550]_KFH46845.1    | RAAKKLRDDIDA   | ASTRT...TDGSR                             | .....                      | AEK |
| [Pochonia chlamydosporia]_170]_XP_018148143.1      | RAAKKLADDITS   | AGVD...V.....                             | .....                      | SAG |
| [Epichloe festucae]_F11]_QPG98063.1                | RAAKKLADEIAA   | ARHSG                                     | .....                      | P   |
| [Colletotrichum incanum]_KZ182863.1                | RAAKKLGAIAA    | KAG                                       | .....                      | GRA |
| [Colletotrichum simmondsii]_KXH39849.1             | RAAKKLGAIAA    | KAG                                       | .....                      | GRA |
| [Colletotrichum sojiae]_KAF6819546.1               | RAAKKLGAIAA    | KAR                                       | .....                      | GRS |



| [Trichoderma_harzianum]_ThaL                       | β3     | α4     | T . . . T   | β4          | TT          | α5                     |                   |
|----------------------------------------------------|--------|--------|-------------|-------------|-------------|------------------------|-------------------|
|                                                    | 150    | 160    | 170         | 180         | 190         | 200                    |                   |
| [Trichoderma_harzianum]_ThaL                       | NIIAHS | MGGGLD | ARYMISLLRP  | ...SGIRIAS  | LVTIATPHRGS | FADYLVLR..GAG..PL      |                   |
| [Trichoderma_harzianum]_KKO99473.1                 | NIIAHS | MGGGLD | ARYMISLLRP  | ...SGIRIAS  | LVTIATPHRGS | FADYLVLR..GAG..PL      |                   |
| [Trichoderma_guizhouense]_OPB43634.1               | NIIAHS | MGGGLD | ARYMISLLRP  | ...SGIRIAS  | LVTIATPHRGS | FADYLVLR..GAG..PL      |                   |
| [Trichoderma_simmonsii]_QYS94233.1                 | NIIAHS | MGGGLD | ARYMISLLRP  | ...SGIRIAS  | LVTIATPHRGS | FADYLVLR..GAG..PL      |                   |
| [Trichoderma_harzianum_CBS_226.95]_XP_024777038.1  | NIIAHS | MGGGLD | ARYMISLLRP  | ...SGIQIAS  | LVTIATPHRGS | FADYLVLR..GAG..PL      |                   |
| [Trichoderma_harzianum]_PKK42226.1                 | NIIAHS | MGGGLD | ARYMISLLRP  | ...SGIQIAS  | LVTIATPHRGS | FADYLVLR..GAG..PL      |                   |
| [Trichoderma_lentiforme]_KAF3077685.1              | NIIAHS | MGGGLD | ARYMISLLRP  | ...SGIRIAS  | LVTIATPHRGS | FADYLVLR..GAG..PL      |                   |
| [Trichoderma_harzianum]_PNP59423.1                 | NIIAHS | MGGGLD | ARYMISLLRP  | ...SGIRIAS  | LVTIATPHRGS | FADYLVLR..GAG..PL      |                   |
| [Trichoderma_virens_FT-333]_UKZ73321.1             | NIIAHS | MGGGLD | ARYMISLLRP  | ...SGIRIAS  | LVTIATPHRGS | FADYLVLR..GAG..PL      |                   |
| [Trichoderma_virens_Gv29-8]_XP_013960763.1         | NIIAHS | MGGGLD | ARYMISLLRP  | ...SGIRIAS  | LVTIATPHRGS | FADYLVLR..GAG..PL      |                   |
| [Trichoderma_asperellum_CBS_433.97]_XP_024756506.1 | NIIAHS | MGGGLD | ARYMISRLKPA | ..LANVRVA   | LVTIATPHRGS | FADYLVLR..GAG..PI      |                   |
| [Trichoderma_atroviride_IMI_206040]_XP_013943551.1 | NIIAHS | MGGGLD | ARYMISRLKPV | ..LKNVRVA   | LVTIATPHRGS | FADYLVLR..GAG..PI      |                   |
| [Trichoderma_gamsii]_PNP38305.1                    | NIIAHS | MGGGLD | ARYMISRLKPV | ..LQNVRVA   | LVTIATPHRGS | FADYLVLR..GAG..PI      |                   |
| [Trichoderma_gamsii]_XP_018663207.1                | NIIAHS | MGGGLD | ARYMISRLKPV | ..LQNVRVA   | LVTIATPHRGS | FADYLVLR..GAG..PI      |                   |
| [Trichoderma_arundinaceum]_RFU75476.1              | NIIAHS | MGGGLD | ARYMISRLQP  | ...LNINIAS  | LVTIATPHRGS | FADYLVLR..GAG..PI      |                   |
| [Trichoderma_gracile]_KAH0498535.1                 | NIIAHS | MGGGLD | ARYMISRLRP  | ...RGIRVA   | LVTIATPHRGS | FADYLVDS..DAGS..PL     |                   |
| [Trichoderma_reesei_QM6a]_XP_006968245.1           | NIIAHS | MGGGLD | ARYMISRLRP  | ...RGIKVA   | LVTIATPHRGS | FADYLVDS..DAGS..PL     |                   |
| [Trichoderma_citrinoviride]_XP_024753310.1         | NIIAHS | MGGGLD | ARYMISRLRP  | ...AGIKVA   | LVTIATPHRGS | FADYLVDS..DSS..PV      |                   |
| [Trichoderma_longibrachiatum_ATCC_18648]_PTB78011  | NIIAHS | MGGGLD | ARYMISRLRP  | ...RGIKVA   | LVTIATPHRGS | FADYLVDS..DTS..PL      |                   |
| [Hirsutella_minnesotensis_3608]_KJZ78693.1         | NIIAHS | MGGGLD | ARYMISHLQP  | ...GKVA     | LVTIATPHRGS | FADYLVLEK..GAG..PI     |                   |
| [Hirsutella_rhoosiliensis]_XP_044725020.1          | NIIAHS | MGGGLD | ARYLISHLQP  | Q..GROVTVA  | LVTIATPHRGS | FADYLVFDK..GAG..PI     |                   |
| [Ophiocordyceps_sinensis_CO18]_EQK99704.1          | NIIAHS | MGGGLD | ARYLISHLQPK | ..GQPTVAS   | LVTIATPHRGS | FADYLVLE..GAG..PF      |                   |
| [Tolypocladium_capitatum]_PNY29418.1               | NIIAHS | MGGGLD | ARYMISHLLRA | ..TPNVRIAS  | LTISTPHRGS  | FADYLVLEE..GAG..PI     |                   |
| [Tolypocladium_ophioglossoides_CBS_100239]_KND888  | NIIAHS | MGGGLD | ARYMISHLLRA | ..TPNVRIAS  | LTISTPHRGS  | FADYLVLEK..GAG..PI     |                   |
| [Tolypocladium_paradoxum]_POR38551.1               | NIIAHS | MGGGLD | ARYMVSHLLRA | ..TPDVRVA   | LTISTPHRGS  | FADYLVLE..GAG..PM      |                   |
| [Drechmeria_coniospora]_ODA83100.1                 | NIIAHS | MGGGLD | ARYMISRLQRA | ..NSNFRVA   | LVTIATPHRGS | FADYLVLE..SAG..PL      |                   |
| [Drechmeria_coniospora]_XP_040657415.1             | NIIAHS | MGGGLD | ARYMISRLQRA | ..NSNFRVA   | LVTIATPHRGS | FADYLVLE..SAG..PL      |                   |
| [Ophiocordyceps_unilateralis]_PFH57814.1           | NVIAHS | MGGGLD | ARYMISRLPH  | ...RRAVAS   | LTISTPHRGS  | FADYVLLAA..G..G..PL    |                   |
| [Fusarium_sp._AF-6]_RSL54391.1                     | TIIAHS | MGGGLD | ARYMLAHLKP  | ...LPVRVA   | LVTIATPHRGS | FADYLVLE..QVS..PL      |                   |
| [Fusarium_kuroshium]_RMJ16314.1                    | TIIAHS | MGGGLD | ARYMLAHLKP  | ...LPVRVA   | LVTIATPHRGS | FADYLVLE..QVS..PL      |                   |
| [Fusarium_sp._AF-8]_RSI70798.1                     | TIIAHS | MGGGLD | ARYMLAHLKP  | ...LPVRVA   | LVTIATPHRGS | FADYLVLE..QVS..PL      |                   |
| [Fusarium_ambrosium]_RSM11997.1                    | TIIAHS | MGGGLD | ARYMLAHLKP  | ...LPVRVA   | LVTIATPHRGS | FADYLVLE..QVS..PL      |                   |
| [Fusarium_floridanum]_RSL80024.1                   | TIIAHS | MGGGLD | ARYMLAHLKP  | ...LPVRVA   | LVTIATPHRGS | FADYLVLE..QVS..PL      |                   |
| [Fusarium_vanettenii_77-13-4]_XP_003050716.1       | TIIAHS | MGGGLD | ARYMLAHLKP  | ...LPVRVA   | LVTIATPHRGS | FADYLVLE..QVS..PL      |                   |
| [Fusarium_solani]_XP_046134414.1                   | TIIAHS | MGGGLD | ARYMLAHLNP  | ...LPVRVA   | LVTIATPHRGS | FADYLVLE..QVS..PL      |                   |
| [Fusarium_albosuccineum]_KAF4468415.1              | TIIAHS | MGGGLD | ARYMLAHLAP  | ...LPVRVA   | LVTIATPHRGS | FADYLVLE..QVS..PL      |                   |
| [Fusarium_decemcellulare]_KAF50111412.1            | TIIAHS | MGGGLD | ARYMLAHLTP  | ...LPVRVA   | LVTIATPHRGS | FADYLVLE..QVS..PL      |                   |
| [Fusarium_sarcochroum]_KAF4964785.1                | TIIV   | HS     | MGGGLD      | ARYMLSHLAP  | ...LPVRVA   | LVTIATPHRGS            | FADYLVLE..EVS..PL |
| [Fusarium_avenaceum]_KAH696852.1                   | TIIV   | HS     | MGGGLD      | ARYMLSHLEP  | ...LPVRVA   | LVTIATPHRGS            | FADYLVLE..EVS..PL |
| [Fusarium_avenaceum]_KIL96274.1                    | TIIV   | HS     | MGGGLD      | ARYMLSHLEP  | ...LPVRVA   | LVTIATPHRGS            | FADYLVLE..EVS..PL |
| [Fusarium_avenaceum]_KAG5656265.1                  | TIIV   | HS     | MGGGLD      | ARYMLSHLEP  | ...LPVRVA   | LVTIATPHRGS            | FADYLVLE..EVS..PL |
| [Fusarium_tricinatum]_KAH7262197.1                 | TIIV   | HS     | MGGGLD      | ARYMLSHLEP  | ...LPVRVA   | LVTIATPHRGS            | FADYLVLE..EVS..PL |
| [Fusarium_heterosporum]_KAF5663380.1               | TIIV   | HS     | MGGGLD      | ARYMLSHLEP  | ...LPVRVA   | LVTIATPHRGS            | FADYLVLE..EVS..PL |
| [Fusarium_sp._MPI-SDFR-AT-0072]_KAH7164412.1       | TIIV   | HS     | MGGGLD      | ARYMLSHLAP  | ...LPVRVA   | LVTVATPHRGS            | FADYLVLE..EVS..PL |
| [Fusarium_oxysporum_f._sp._rapae]_KAG7414252.1     | TIIV   | HS     | MGGGLD      | ARYMLSHLAP  | ...LPVRVA   | LVTVATPHRGS            | FADYLVLE..EVS..PL |
| [Fusarium_mangiferae]_XP_041681833.1               | TIIV   | HS     | MGGGLD      | ARYMLSHLAP  | ...LPVRVA   | LVTVATPHRGS            | FADYLVLE..EVS..PL |
| [Fusarium_proliferatum]_CVL11341.1                 | TIIV   | HS     | MGGGLD      | ARYMLSHLTP  | ...LPVRVA   | LVTVATPHRGS            | FADYLVLE..EVS..PL |
| [Fusarium_proliferatum_ET1]_XP_031083673.1         | TIIV   | HS     | MGGGLD      | ARYMLSHLTP  | ...LPVRVA   | LVTVATPHRGS            | FADYLVLE..EVS..PL |
| [Fusarium_fujikuroi]_SCN78580.1                    | TIIV   | HS     | MGGGLD      | ARYMLSHLAP  | ...LPVRVA   | LVTVATPHRGS            | FADYLVLE..EVS..PL |
| [Fusarium_fujikuroi_IMI_58289]_XP_023430709.1      | TIIV   | HS     | MGGGLD      | ARYMLSHLAP  | ...LPVRVA   | LVTVATPHRGS            | FADYLVLE..EVS..PL |
| [Fusarium_sp._NRRL_25303]_KAF5626228.1             | TIIV   | HS     | MGGGLD      | ARYMLSHLAP  | ...LPVRVA   | LVTVATPHRGS            | FADYLVLE..EVS..PL |
| [Fusarium_xylarioides]_KAG5746670.1                | TIIV   | HS     | MGGGLD      | ARYMLSHLAP  | ...LPVRVA   | LVTVATPHRGS            | FADYLVLE..EVS..PL |
| [Fusarium_xylarioides]_KAG5788219.1                | TIIV   | HS     | MGGGLD      | ARYMLSHLAL  | ...LPVRVA   | LVTVATPHRGS            | FADYLVLE..EVS..PL |
| [Fusarium_pseudocircinatum]_KAF5575212.1           | TIIV   | HS     | MGGGLD      | ARYMLSHLAP  | ...LPVRVA   | LVTVATPHRGS            | FADYLVLE..EVS..PL |
| [Fusarium_pseudoanthophilum]_KAF5575021.1          | TIIV   | HS     | MGGGLD      | ARYMLSHLAP  | ...LPVRVA   | LVTVATPHRGS            | FADYLVLE..EVS..PL |
| [Fusarium_verticilliioides]_RBQ71412.1             | TIIV   | HS     | MGGGLD      | ARYMLSHLAP  | ...LPVRVA   | LVTVATPHRGS            | FADYLVLE..EVS..PL |
| [Fusarium_verticilliioides_7600]_XP_018746479.1    | TIIV   | HS     | MGGGLD      | ARYMLSHLAP  | ...LPVRVA   | LVTVATPHRGS            | FADYLVLE..EVS..PL |
| [Fusarium_oxysporum_NRRL_32931]_XP_031039788.1     | TIIV   | HS     | MGGGLD      | TRYMLSHLAP  | ...LPVRVA   | LVTVATPHRGS            | FADYLVLE..EVS..PL |
| [Fusarium_oxysporum_f._sp._lycopersici_4287]_XP_0  | TIIV   | HS     | MGGGLD      | TRYMLSHLAP  | ...LPVRVA   | LVTVATPHRGS            | FADYLVLE..EVS..PL |
| [Fusarium_oxysporum_f._sp._cepae]_RKK20771.1       | TIIV   | HS     | MGGGLD      | TRYMLSHLAP  | ...LPVRVA   | LVTVATPHRGS            | FADYLVLE..EVS..PL |
| [Fusarium_redolens]_XP_04051341.1                  | TIIV   | HS     | MGGGLD      | ARYMLSHLAP  | ...LPVRVA   | LVTVATPHRGS            | FADYLVLE..EVS..PL |
| [Fusarium_austroafricanum]_KAF4458007.1            | TIIV   | HS     | MGGGLD      | ARYMLSHLAP  | ...LPVHVA   | LVTVATPHRGS            | FADYLVLE..EVS..PL |
| [Fusarium_flagelliforme]_XP_045986929.1            | TIIV   | HS     | MGGGLD      | ARYMLSHLEP  | ...LPVRVA   | LVTVATPHRGS            | FADYLVLE..EVS..PL |
| [Fusarium_sp._FIESC_RH6]_KAT1056250.1              | TIIV   | HS     | MGGGLD      | ARYMLSHLEP  | ...LPVRVA   | LVTVATPHRGS            | FADYLVLE..EVS..PL |
| [Fusarium_sporotrichioides]_RGP72309.1             | TIIV   | HS     | MGGGLD      | ARYMLSLRLEP | ...LPVRVA   | LVTVATPHRGS            | FADYLVLE..EVS..PV |
| [Fusarium_poeae]_XP_044713592.1                    | TIIV   | HS     | MGGGLD      | ARYMLSHLEP  | ...LPVRVA   | LVTVATPHRGS            | FADYLVLE..EVS..PV |
| [Fusarium_venenatum]_XP_025590637.1                | TIIV   | HS     | MGGGLD      | ARYMLSHLEP  | ...LPVRVA   | LVTVATPHRGS            | FADYLVLE..EVS..PV |
| [Fusarium_pseudograminearum]_KAF0641638.1          | TIIV   | HS     | MGGGLD      | ARYMLSHLEP  | ...LPVRVA   | LVTVATPHRGS            | FADYLVLE..EVS..PV |
| [Fusarium_graminearum]_CAG1993854.1                | TIIV   | HS     | MGGGLD      | ARYMLSHLEP  | ...LPVRVA   | LVTVATPHRGS            | FADYLVLE..EVS..PV |
| [Fusarium_graminearum]_PCD31638.1                  | TIIV   | HS     | MGGGLD      | ARYMLSHLEP  | ...LPVRVA   | LVTVATPHRGS            | FADYLVLE..EVS..PV |
| [Fusarium_graminearum]_CZS78629.1                  | TIIV   | HS     | MGGGLD      | ARYMLSHLEP  | ...LPVRVA   | LVTVATPHRGS            | FADYLVLE..EVS..PV |
| [Fusarium_graminearum]_CAF3606094.1                | TIIV   | HS     | MGGGLD      | ARYMLSHLEP  | ...LPVRVA   | LVTVATPHRGS            | FADYLVLE..EVS..PV |
| [Fusarium_graminearum_PH-1]_XP_011318944.1         | TIIV   | HS     | MGGGLD      | ARYMLSHLEP  | ...LPVRVA   | LVTVATPHRGS            | FADYLVLE..EVS..PV |
| [Fusarium_culmorum]_QPC68571.1                     | TIIV   | HS     | MGGGLD      | ARYMLSHLDP  | ...LPVRVA   | LVTVATPHRGS            | FADYLVLE..EVS..PV |
| [Fusarium_pseudograminearum]_QPC77441.1            | TIIV   | HS     | MGGGLD      | ARYMLSHLEP  | ...LPVRVA   | LVTVATPHRGS            | FADYLVLE..EVS..PV |
| [Fusarium_longipes]_RGP79158.1                     | TIIV   | HS     | MGGGLD      | ARYMLSHLEP  | ...LPVRVA   | LVTVATPHRGS            | FADYLVLE..EVS..PV |
| [Ilyonectria_destructans]_KAH7011941.1             | NIIAHS | MGGGLD | ARYMLAHMSP  | ...PVRVA    | LVTVATPHRGS | FADYLVLEE..G..G..PI    |                   |
| [Ilyonectria_sp._MPI-CAGE-AT-0026]_KAH6985660.1    | NIIAHS | MGGGLD | ARYMLAHMSP  | ...PVRVA    | LVTVATPHRGS | FADYLVLEE..G..G..PI    |                   |
| [Ilyonectria_robusta]_XP_046104990.1               | NIIAHS | MGGGLD | ARYMLAHMSP  | ...PVRVA    | LVTVATPHRGS | FADYLVLEE..G..G..PI    |                   |
| [Dactylonectria_estremocensis]_KAH7149692.1        | NIIAHS | MGGGLD | ARYMLAHMSP  | ...APVRVA   | LVTVATPHRGS | FADYLVLEE..G..G..PI    |                   |
| [Dactylonectria_macrodidyma]_KAH7148923.1          | NIIAHS | MGGGLD | ARYMLAHMSP  | ...APIPVA   | LVTVATPHRGS | FADYLVLEE..G..G..PI    |                   |
| [Thelonectria_olida]_KAH6899778.1                  | NIIAHS | MGGGLD | ARYMLSHMAP  | ...TPVKVA   | LVTVATPHRGS | FADYLVLDK..NLA..PI     |                   |
| [Stachybotrys_chartarum_IBT_7711]_KEY69997.1       | NIIAHS | MGGGLD | ARYMVANLRP  | ...KGVRA    | LVTVATPHRGS | FADYLVLE..Q..Q..PI     |                   |
| [Stachybotrys_chartarum_IBT_40293]_KFA50745.1      | NIIAHS | MGGGLD | ARYMVANLRP  | ...KGVRA    | LVTVATPHRGS | FADYLVLE..Q..Q..PI     |                   |
| [Stachybotrys_chlorohalonata_IBT_40285]_KFA62815.1 | NIIAHS | MGGGLD | ARYMVANLRP  | ...KGVRA    | LVTVATPHRGS | FADYLVLE..Q..Q..PI     |                   |
| [Purpureocillium_lilacinum]_XP_018174914.1         | NIIAHS | MGGGLD | ARHLISSILP  | SSPQHNFVA   | LTISTPHRGS  | FADYVLSD..SRRS..LL     |                   |
| [Clonostachys_solani]_CAH0059244.1                 | NIIAHS | MGGGLD | ARYLASRLAP  | ...DSVAIKS  | ITITATPHRGS | HFADFLMSD..SA..PI      |                   |
| [Clonostachys_rosea]_VUC36940.1                    | NIIAHS | MGGGLD | ARYLASRLAP  | ...DSVVKIS  | ITITATPHRGS | HFADFLMSD..SA..PI      |                   |
| [Clonostachys_rhizophaga]_CAH0026503.1             | NIIAHS | MGGGLD | ARYLASCLAP  | ...DSVAIKS  | ITITATPHRGS | HFADFLMSD..SA..PI      |                   |
| [Emericellopsis_atlantica]_XP_046114137.1          | NIIAHS | MGGGLD | ARYMISHLPP  | ...KYVDIAS  | LVTVASPHRGS | FADYVLQED..G..G..LV    |                   |
| [Acremonium_chrysogenum_ATCC_11550]_KFH46845.1     | NIIAHS | MGGGLD | ARYMIRHLPP  | ...RTAEVAS  | LVTVSTPHRGS | HFADYVLDE..DAAD..G..LV |                   |
| [Pochonia_chlamydosporia_170]_XP_018148143.1       | NVVAHS | MGGGLD | ARWMISNILKP | ERSLKVAS    | LTISTPHRGS  | PFADYVLHS..SSG..IM     |                   |
| [Epichloe_festueae_F11]_QPG98063.1                 | NIIAHS | MGGGLD | ARYMISKMATQ | TQRIQVSS    | LTIVSTPHRGS | PFADYVLHS..SSG..IM     |                   |
| [Colletotrichum_incanum]_KZL82863.1                | NIIAHS | MGGGLD | ARYMISHLKP  | ...ANVKVMS  | LVTVATPHRGS | FADYLVLE..RG..PI       |                   |
| [Colletotrichum_simmondsii]_KXH39849.1             | NIIAHS | MGGGLD | ARYMISHLKP  | ...RDVKVLS  | LVTVATPHRGS | FADYLVLDG..QG..PI      |                   |
| [Colletotrichum_sojae]_KAF6819546.1                | NIIAHS | MGGGLD | ARYMISHLKP  | ...RDVDRSL  | LVTVATPHRGS | FADYLVLDG..RG..PI      |                   |

[Trichoderma harzianum]\_ThaL

α6 α7 α8 β5  
210 220 230 240 250

|                                                    |     |     |    |    |     |     |   |   |   |   |   |   |   |   |    |   |    |   |   |   |   |   |   |   |   |   |   |   |   |   |   |   |   |   |   |   |   |   |   |   |   |   |    |    |    |    |    |   |   |
|----------------------------------------------------|-----|-----|----|----|-----|-----|---|---|---|---|---|---|---|---|----|---|----|---|---|---|---|---|---|---|---|---|---|---|---|---|---|---|---|---|---|---|---|---|---|---|---|---|----|----|----|----|----|---|---|
| [Trichoderma harzianum]_ThaL                       | H.. | LPR | LV | GV | IR  | RAG | L | G | T | S | A | F | G | Q | L  | T | RY | M | R | E | E | F | N | P | R | V | R | D | E | A | V | R | Y | F | S | Y | G | A | A | I | D | E | P  | .. | S  | L  |    |   |   |
| [Trichoderma harzianum]_KKO99473.1                 | H.. | LPR | LV | GV | IR  | RAG | L | G | T | S | A | F | G | Q | L  | T | RY | M | R | E | E | F | N | P | R | V | R | D | E | A | V | R | Y | F | S | Y | G | A | A | I | D | E | P  | .. | S  | L  |    |   |   |
| [Trichoderma guizhouense]_OPB43634.1               | H.. | LPR | LV | GV | IR  | RAG | L | G | T | S | A | F | G | Q | L  | T | RY | M | R | E | E | F | N | P | R | V | R | D | E | G | V | R | Y | F | S | Y | G | A | A | I | D | E | P  | .. | S  | L  |    |   |   |
| [Trichoderma simmonsii]_QYS94233.1                 | H.. | LPR | LV | GV | IR  | RAG | L | G | T | S | A | F | G | Q | L  | T | RY | M | R | E | E | F | N | P | R | V | R | D | E | G | V | R | Y | F | S | Y | G | A | A | I | D | E | P  | .. | S  | L  |    |   |   |
| [Trichoderma harzianum_CBS_226.95]_XP_024777038.1  | H.. | LPR | LV | GV | IR  | RAG | L | G | T | S | A | F | G | Q | L  | T | RY | M | R | E | E | F | N | P | R | V | R | D | E | G | V | R | Y | F | S | Y | G | A | A | I | D | E | P  | .. | S  | L  |    |   |   |
| [Trichoderma harzianum]_PKK42226.1                 | H.. | LPR | LV | GV | IR  | RAG | L | G | T | S | A | F | G | Q | L  | T | RY | M | R | E | E | F | N | P | R | V | R | D | E | G | V | R | Y | F | S | Y | G | A | A | I | D | E | P  | .. | S  | L  |    |   |   |
| [Trichoderma lentiforme]_KAF3077685.1              | H.. | LPR | LV | GV | IR  | RAG | L | G | T | S | A | F | G | Q | L  | T | RY | M | R | E | E | F | N | P | R | V | R | D | E | G | V | R | Y | F | S | Y | G | A | A | I | D | E | P  | .. | S  | L  |    |   |   |
| [Trichoderma harzianum]_PNP59423.1                 | H.. | LPR | LV | GV | IR  | RAG | L | G | T | S | A | F | G | Q | L  | T | RY | M | R | E | E | F | N | P | R | V | R | D | E | A | V | R | Y | F | S | Y | G | A | A | I | D | E | P  | .. | S  | L  |    |   |   |
| [Trichoderma virens_FT-333]_UKZ73321.1             | H.. | LPR | LV | GV | IR  | RAG | L | G | T | S | A | F | G | Q | L  | T | RY | M | R | E | E | F | N | P | R | V | R | D | E | A | V | R | Y | F | S | Y | G | A | A | I | D | E | P  | .. | S  | L  |    |   |   |
| [Trichoderma virens_Gv29-8]_XP_013960763.1         | H.. | LPR | LV | GV | IR  | RAG | L | G | T | S | A | F | G | Q | L  | T | RY | M | R | E | E | F | N | P | R | V | R | D | E | A | V | R | Y | F | S | Y | G | A | A | I | D | E | P  | .. | S  | L  |    |   |   |
| [Trichoderma asperellum_CBS_433.97]_XP_024756506.1 | H.. | LPR | LV | GV | IR  | RAG | L | G | T | S | A | F | G | Q | L  | T | RY | M | R | E | E | F | N | P | R | V | R | D | E | A | V | R | Y | F | S | Y | G | A | A | I | D | E | P  | .. | S  | L  |    |   |   |
| [Trichoderma atroviride_IMI_206040]_XP_013943551.1 | H.. | LPR | LV | SI | IR  | RAG | L | G | T | S | A | F | G | Q | L  | T | RY | M | R | E | E | F | N | P | R | V | R | D | E | A | V | R | Y | F | S | Y | G | A | A | I | D | E | P  | .. | S  | L  |    |   |   |
| [Trichoderma gamsii]_PNP38305.1                    | H.. | LPR | LV | SI | IR  | RAG | L | G | T | S | A | F | G | Q | L  | T | RY | M | R | E | E | F | N | P | R | V | R | D | E | A | V | R | Y | F | S | Y | G | A | A | I | D | E | P  | .. | S  | L  |    |   |   |
| [Trichoderma gamsii]_XP_018663207.1                | H.. | LPR | LV | SI | IR  | RAG | L | G | T | S | A | F | G | Q | L  | T | RY | M | R | E | E | F | N | P | R | V | R | D | E | A | V | R | Y | F | S | Y | G | A | A | I | D | E | P  | .. | S  | L  |    |   |   |
| [Trichoderma arundinaceum]_RFU75476.1              | H.. | LPR | LV | GI | IR  | RAG | L | G | T | S | A | F | G | Q | L  | T | RY | M | R | E | E | F | N | P | R | V | R | D | E | S | V | R | Y | F | S | Y | G | A | A | I | D | E | P  | .. | S  | L  |    |   |   |
| [Trichoderma gracile]_KAH0498535.1                 | H.. | LPR | LV | SV | IR  | RAG | L | G | T | S | A | F | G | Q | L  | T | RY | M | R | E | E | F | N | P | R | V | R | D | E | R | V | R | Y | F | S | Y | G | A | A | I | D | E | P  | .. | S  | L  |    |   |   |
| [Trichoderma reesei_QM6a]_XP_006968245.1           | H.. | LPR | LV | SV | IR  | RAG | L | G | T | S | A | F | G | Q | L  | T | RY | M | R | E | E | F | N | P | R | V | R | D | Q | A | V | R | Y | F | S | Y | G | A | A | I | D | E | P  | .. | S  | L  |    |   |   |
| [Trichoderma citrinoviride]_XP_024753310.1         | H.. | LPR | LV | SV | IR  | RAG | L | G | T | S | A | F | G | Q | L  | T | RY | M | R | E | E | F | N | P | R | V | R | D | E | A | V | R | Y | F | S | Y | G | A | A | I | D | E | P  | .. | S  | L  |    |   |   |
| [Trichoderma longibrachiatum_ATCC_18648]_PTB78011  | H.. | LPR | LV | SV | IR  | RAG | L | G | T | S | A | F | G | Q | L  | T | RY | M | R | E | E | F | N | P | R | V | R | D | E | G | V | R | Y | F | S | Y | G | A | A | I | D | E | P  | .. | S  | L  |    |   |   |
| [Hirsutella minnesotensis_3608]_KJZ78693.1         | Y.. | LPK | LV | GV | LK  | KAG | L | G | T | S | A | F | G | Q | L  | T | RY | M | V | N | E | F | N | P | R | V | R | D | N | P | S | V | R | Y | F | S | Y | G | S | V | T | D | T  | P  | .. | P  | V  |   |   |
| [Hirsutella rhossiliensis]_XP_044725020.1          | Y.. | LPK | LV | RL | LE  | KAG | L | G | T | S | A | F | G | Q | L  | T | RY | M | A | Q | E | F | N | P | R | V | R | D | T | D | P | L | V | R | Y | F | S | Y | G | A | V | I | D  | K  | P  | .. | P  | L |   |
| [Ophiocordyceps sinensis_CO18]_EQK99704.1          | H.. | LPR | LV | RV | LE  | KAG | L | G | T | S | A | F | G | Q | L  | T | RY | M | A | Q | E | F | N | P | R | V | R | D | T | D | P | S | V | R | Y | F | S | Y | G | A | V | S | D  | A  | P  | .. | S  | L |   |
| [Tolypocladium capitatum]_PNY29418.1               | Y.. | LPR | LV | GV | LQ  | RAG | L | G | T | S | A | F | G | Q | L  | T | RY | L | A | D | E | F | N | P | R | V | R | D | T | D | P | S | V | R | Y | F | S | Y | G | A | A | M | N  | E  | P  | .. | P  | L |   |
| [Tolypocladium ophioglossoides_CBS_100239]_KND888  | Y.. | LPK | LV | GV | LQ  | RAG | L | G | T | S | A | F | G | Q | L  | T | RY | M | A | D | E | F | N | P | R | V | R | D | T | D | P | S | V | R | Y | F | S | Y | G | A | A | M | N  | E  | P  | .. | P  | L |   |
| [Tolypocladium paradoxum]_POR38551.1               | H.. | LPR | LV | GV | LQ  | RAG | L | G | T | S | A | F | G | Q | L  | T | RY | M | A | D | E | F | N | P | R | V | R | D | D | E | P | V | R | Y | F | S | Y | G | A | V | M | R | E  | P  | .. | P  | L  |   |   |
| [Drechmeria coniospora]_ODA83100.1                 | Y.. | LPR | LV | SL | LER | AG  | L | G | T | S | A | F | G | Q | L  | T | RY | L | A | T | E | F | N | P | R | V | R | D | P | A | V | R | Y | F | S | Y | G | A | V | V | E | D | L  | .. | P  | L  |    |   |   |
| [Drechmeria coniospora]_XP_040657415.1             | Y.. | LPR | LV | SL | LER | AG  | L | G | T | S | A | F | G | Q | L  | T | RY | L | A | T | E | F | N | P | R | V | R | D | P | A | V | R | Y | F | S | Y | G | A | V | V | E | D | L  | .. | P  | L  |    |   |   |
| [Ophiocordyceps unilateralis]_PFH57814.1           | H.. | LPR | LV | GL | LR  | VGL | T | S | A | F | G | Q | L | T | RY | M | T  | D | D | F | N | P | R | V | R | D | E | D | S | V | R | Y | F | S | Y | G | A | V | A | P | S | P | .. | P  | L  |    |    |   |   |
| [Fusarium sp._AF-6]_RSL54391.1                     | H.. | LPR | LV | WM | LER | AG  | L | G | T | S | A | F | G | Q | L  | T | RY | M | A | D | E | F | N | P | R | V | R | D | T | C | D | S | V | H | Y | F | S | Y | G | A | A | V | E  | R  | P  | .. | A  | L |   |
| [Fusarium_kuroshium]_RMJ16314.1                    | H.. | LPR | LV | WM | LER | AG  | L | G | T | S | A | F | G | Q | L  | T | RY | M | A | D | E | F | N | P | R | V | R | D | T | C | D | S | V | H | Y | F | S | Y | G | A | A | V | E  | R  | P  | .. | A  | L |   |
| [Fusarium_sp._AF-8]_RSL70798.1                     | H.. | LPR | LV | WM | LER | AG  | L | G | T | S | A | F | G | Q | L  | T | RY | M | A | D | E | F | N | P | R | V | R | D | T | C | D | S | V | H | Y | F | S | Y | G | A | A | V | E  | R  | P  | .. | A  | L |   |
| [Fusarium_ambrosium]_RSM11997.1                    | H.. | LPR | LV | WM | LER | AG  | L | G | T | S | A | F | G | Q | L  | T | RY | M | A | D | E | F | N | P | R | V | R | D | T | C | D | S | V | H | Y | F | S | Y | G | A | A | V | E  | R  | P  | .. | A  | L |   |
| [Fusarium_floridanum]_RSL80024.1                   | H.. | LPR | LV | WM | LER | AG  | L | G | T | S | A | F | G | Q | L  | T | RY | M | A | D | E | F | N | P | R | V | R | D | T | C | D | S | V | H | Y | F | S | Y | G | A | A | V | E  | R  | P  | .. | A  | L |   |
| [Fusarium_vanettenii_77-13-4]_XP_003050716.1       | H.. | LTR | LV | WM | LER | AG  | L | G | T | S | A | F | G | Q | L  | T | RY | M | A | D | E | F | N | P | R | V | R | D | T | C | D | S | V | H | Y | F | S | Y | G | A | A | V | E  | R  | P  | .. | A  | L |   |
| [Fusarium_solani]_XP_046134414.1                   | H.. | LPR | LV | WM | LER | AG  | L | G | T | S | A | F | G | Q | L  | T | RY | M | T | D | E | F | N | P | R | V | R | D | T | C | D | S | V | H | Y | F | S | Y | G | A | A | V | E  | R  | P  | .. | A  | L |   |
| [Fusarium_albosuccineum]_KAF4468415.1              | H.. | LPR | LV | KT | LER | AG  | L | G | T | S | A | F | G | Q | L  | T | RY | M | A | D | E | F | N | P | R | V | R | D | T | C | A | D | S | V | H | Y | F | S | Y | G | A | A | V  | E  | Q  | P  | .. | A | M |
| [Fusarium_decemcellulare]_KAF50511412.1            | H.. | LPR | LV | KT | LER | AG  | L | G | T | S | A | F | G | Q | L  | T | RY | M | A | D | E | F | N | P | R | V | R | D | T | C | A | D | S | V | H | Y | F | S | Y | G | A | A | V  | E  | R  | P  | .. | A | L |
| [Fusarium_sarcochroum]_KAF4964785.1                | HRY | LPR | LV | HT | LE  | KAG | L | G | T | S | A | F | G | Q | L  | T | RY | M | A | E | E | F | N | P | R | V | R | D | T | K | P | D | V | R | Y | F | S | Y | G | A | A | V | E  | Q  | P  | .. | P  | L |   |
| [Fusarium_avenaceum]_KAG696852.1                   | HQY | LPR | LV | QT | FE  | KAG | L | G | T | S | A | F | G | Q | L  | T | RY | M | A | E | E | F | N | P | R | V | R | D | T | R | P | D | V | R | Y | F | S | Y | G | A | A | V | E  | Q  | P  | .. | A  | L |   |
| [Fusarium_avenaceum]_KIL96274.1                    | HQY | LPR | LV | QT | FE  | KAG | L | G | T | S | A | F | G | Q | L  | T | RY | M | A | E | E | F | N | P | R | V | R | D | T | R | P | D | V | R | Y | F | S | Y | G | A | A | V | E  | Q  | P  | .. | A  | L |   |
| [Fusarium_avenaceum]_KAG5656265.1                  | HQY | LPR | LV | QT | FE  | KAG | L | G | T | S | A | F | G | Q | L  | T | RY | M | A | E | E | F | N | P | R | V | R | D | T | R | P | D | V | R | Y | F | S | Y | G | A | A | V | E  | Q  | P  | .. | A  | L |   |
| [Fusarium_tricinctum]_KAT7262197.1                 | HQY | LPR | LV | QT | FE  | KAG | L | G | T | S | A | F | G | Q | L  | T | RY | M | A | E | E | F | N | P | R | V | R | D | T | R | P | D | V | R | Y | F | S | Y | G | A | A | V | E  | H  | P  | .. | A  | L |   |
| [Fusarium_heterosporum]_KAF5663380.1               | HQY | LPR | LV | HT | LE  | KAG | L | G | T | S | A | F | G | Q | L  | T | RY | M | A | E | E | F | N | P | R | V | R | D | T | Q | P | D | V | R | Y | F | S | Y | G | A | A | V | E  | Q  | P  | .. | A  | L |   |
| [Fusarium_sp._MPI-SDFR-AT-0072]_KAH7164412.1       | HQY | LPR | LV | QT | FE  | KAG | L | G | T | S | A | F | G | Q | L  | T | RY | M | A | E | E | F | N | P | R | V | R | D | T | Q | P | D | V | R | Y | F | S | Y | G | A | A | V |    |    |    |    |    |   |   |



[illegible]

\*

\*



0 0 0 0 0 0 0 0 0 0 0 0 0 0

320  330 340

[illegible]

[*Trichoderma harzianum*]\_ThaL

[*Trichoderma harzianum*]\_ThaL .....  
 [*Trichoderma harzianum*]\_KKO99473.1 .....  
 [*Trichoderma guizhouense*]\_OPB43634.1 .....  
 [*Trichoderma simmonsii*]\_QYS94233.1 .....  
 [*Trichoderma harzianum*]\_CBS\_226\_95]\_XP\_024777038.1 .....  
 [*Trichoderma harzianum*]\_PKK42226.1 .....  
 [*Trichoderma lentiforme*]\_KAF3077685.1 .....  
 [*Trichoderma harzianum*]\_PNP59423.1 .....  
 [*Trichoderma virens*]\_FT-333]\_UKZ73321.1 .....  
 [*Trichoderma virens*]\_Gv29-8]\_XP\_013960763.1 .....  
 [*Trichoderma asperellum*]\_CBS\_433\_97]\_XP\_024756506 .....  
 [*Trichoderma atroviride*]\_IMI\_206040]\_XP\_013943551 .....  
 [*Trichoderma gamsii*]\_PNP38305.1 .....  
 [*Trichoderma gamsii*]\_XP\_018663207.1 .....  
 [*Trichoderma arundinaceum*]\_RFU75476.1 .....  
 [*Trichoderma gracile*]\_KAH0498535.1 .....  
 [*Trichoderma reesei*]\_QM6a]\_XP\_006968245.1 .....  
 [*Trichoderma citrinoviride*]\_XP\_024753310.1 .....  
 [*Trichoderma longibrachiatum*]\_ATCC\_18648]\_PTB78011 .....  
 [*Hirsutella minnesotensis*]\_3608]\_KJZ78693.1 .....  
 [*Hirsutella rhossiliensis*]\_XP\_044725020.1 .....  
 [*Ophiocordyceps sinensis*]\_CO18]\_EQK99704.1 .....  
 [*Tolypocladium capitatum*]\_PNY29418.1 .....  
 [*Tolypocladium ophioglossoides*]\_CBS\_100239]\_KND888 .....  
 [*Tolypocladium paradoxum*]\_POR38551.1 .....  
 [*Drechmeria coniospora*]\_ODA83100.1 .....  
 [*Drechmeria coniospora*]\_XP\_040657415.1 .....  
 [*Ophiocordyceps unilateralis*]\_PFH57814.1 .....  
 [*Fusarium*]\_sp.\_AF-6]\_RSL54391.1 .....  
 [*Fusarium kuroshium*]\_RMJ16314.1 .....  
 [*Fusarium*]\_sp.\_AF-8]\_RSL70798.1 .....  
 [*Fusarium ambrosium*]\_RSM11997.1 .....  
 [*Fusarium floridanum*]\_RSL80024.1 .....  
 [*Fusarium vanettenii*]\_77-13-4]\_XP\_003050716.1 .....  
 [*Fusarium solani*]\_XP\_046134414.1 .....  
 [*Fusarium albosuccineum*]\_KAF4468415.1 .....  
 [*Fusarium decemcellulare*]\_KAF5011412.1 .....  
 [*Fusarium sarcochroum*]\_KAF4964785.1 .....  
 [*Fusarium avenaceum*]\_KAH6968652.1 .....  
 [*Fusarium avenaceum*]\_KIL96274.1 .....  
 [*Fusarium avenaceum*]\_KAG5656265.1 .....  
 [*Fusarium tricinatum*]\_KAH7262197.1 .....  
 [*Fusarium heterosporum*]\_KAF5663380.1 .....  
 [*Fusarium*]\_sp.\_MPI-SDFR-AT-0072]\_KAH7164412.1 .....  
 [*Fusarium oxysporum*]\_f.\_sp.\_rapae]\_KAG7414252.1 .....  
 [*Fusarium mangiferae*]\_XP\_041681833.1 .....  
 [*Fusarium proliferatum*]\_CVL11341.1 .....  
 [*Fusarium proliferatum*]\_ET1]\_XP\_031083673.1 .....  
 [*Fusarium fujikuroi*]\_SCN78580.1 .....  
 [*Fusarium fujikuroi*]\_IMI\_58289]\_XP\_023430709.1 .....  
 [*Fusarium*]\_sp.\_NRRL\_25303]\_KAF5626228.1 .....  
 [*Fusarium xylarioides*]\_KAG5746670.1 .....  
 [*Fusarium xylarioides*]\_KAG5788219.1 .....  
 [*Fusarium pseudocircinatum*]\_KAF5575212.1 .....  
 [*Fusarium pseudoanthophilum*]\_KAF5575021.1 .....  
 [*Fusarium verticillioides*]\_RBQ71412.1 .....  
 [*Fusarium verticillioides*]\_7600]\_XP\_018746479.1 .....  
 [*Fusarium oxysporum*]\_NRRL\_32931]\_XP\_031039788.1 .....  
 [*Fusarium oxysporum*]\_f.\_sp.\_lycopersici\_4287]\_XP\_0 .....  
 [*Fusarium oxysporum*]\_f.\_sp.\_cepae]\_RKK20771.1 .....  
 [*Fusarium redolens*]\_XP\_046051341.1 .....  
 [*Fusarium austroafricanum*]\_KAF4458007.1 .....  
 [*Fusarium flagelliforme*]\_XP\_045986929.1 .....  
 [*Fusarium*]\_sp.\_FIESC\_RH6]\_KAT1056250.1 .....  
 [*Fusarium sporotrichioides*]\_RGP72309.1 .....  
 [*Fusarium poae*]\_XP\_044713592.1 .....  
 [*Fusarium venenatum*]\_XP\_025590637.1 .....  
 [*Fusarium pseudograminearum*]\_KAF0641638.1 .....  
 [*Fusarium graminearum*]\_CAG1993854.1 .....  
 [*Fusarium graminearum*]\_PCD31638.1 .....  
 [*Fusarium graminearum*]\_CZS78629.1 .....  
 [*Fusarium graminearum*]\_CAF3606094.1 .....  
 [*Fusarium graminearum*]\_PH-1]\_XP\_011318944.1 .....  
 [*Fusarium culmorum*]\_QPC68571.1 .....  
 [*Fusarium pseudograminearum*]\_QPC77441.1 .....  
 [*Fusarium longipes*]\_RGP79158.1 .....  
 [*Ilyonectria destructans*]\_KAH7011941.1 .....  
 [*Ilyonectria*]\_sp.\_MPI-CAGE-AT-0026]\_KAH6985660.1 .....  
 [*Ilyonectria robusta*]\_XP\_046104990.1 .....  
 [*Dactylonectria estremocensis*]\_KAH7149692.1 .....  
 [*Dactylonectria macrodidyma*]\_KAH7148923.1 .....  
 [*Thelonectria olida*]\_KAH6899778.1 .....  
 [*Stachybotrys chartarum*]\_IBT\_7711]\_KEY69997.1 .....  
 [*Stachybotrys chartarum*]\_IBT\_40293]\_KFA50745.1 .....  
 [*Stachybotrys chlorohalonata*]\_IBT\_40285]\_KFA62815 .....  
 [*Purpureocillium lilacinum*]\_XP\_018174914.1 .....  
 [*Clonostachys solani*]\_CAH0059244.1 .....  
 [*Clonostachys rosea*]\_VUC36940.1 .....  
 [*Clonostachys rhizophaga*]\_CAH0026503.1 .....  
 [*Emericellopsis atlantica*]\_XP\_046114137.1 .....  
 [*Acremonium chrysogenum*]\_ATCC\_11550]\_KFH46845.1 .....  
 [*Pochonia chlamydosporia*]\_170]\_XP\_018148143.1 .....  
 [*Epichloe festucae*]\_F11]\_QPG98063.1 .....  
 [*Colletotrichum incanum*]\_KZL82863.1 .....  
 [*Colletotrichum simmondsii*]\_KXH39849.1 .....  
 [*Colletotrichum sojae*]\_KAF6819546.1 .....
