# Supplementary material for: Identification of a Novel Lipase with AHSMG Pentapeptide in Hypocreales and Glomerellales Filamentous Fungi
Source: Int J Mol Sci. 2022 Aug 19;23(16):9367. doi: 10.3390/ijms23169367 (PMC9408867; doi:10.3390/ijms23169367)
Supplement: Supplementary file 1 [file ijms-23-09367-s001.zip]

Archive with 9 entries (9 files):
- Figure S1.ThaL lipase and closest hits in Trichoderma harzianum.pdf
- Figure S2.Multialignment of ThaL with known AHSMG-lipases.pdf
- Figure S3A.Multialignment of ThaL and its homologs, without TaLipA, RN2 and 2Z5G..pdf
- Figure S3B.Multialignment of ThaL and its homologs, with TaLipA, RN2 and 2Z5G.pdf
- Figure S4A.Individual alignment of ThaL and its top ten homologs with either TaLipA, RN2 or 2Z5G.tif
- Figure S4B.Alignment of ThaL and its top ten homologs with TaLipA, RN2 and 2Z5G.pdf
- Figure S5.Multialignment of ThaL and other AHSMG-lipases (cluster III) with lipases from other clusters.pdf
- Supplementary legends.pdf
- Table S1.Description Table of ThaL homologs.csv
