# Supplementary material for: Identification of a Novel Lipase with AHSMG Pentapeptide in Hypocreales and Glomerellales Filamentous Fungi
Source: Int J Mol Sci. 2022 Aug 19;23(16):9367. doi: 10.3390/ijms23169367 (PMC9408867; doi:10.3390/ijms23169367)
Supplement: Supplementary file 1 [file ijms-23-09367-s001.zip › Table S1.Description Table of ThaL homologs.csv]

Scientific Name	Accession	Description	Max Score	Total Score	Query Cover	E value	Per. ident	Acc. Len
Trichoderma harzianum	KKO99473.1	hypothetical protein THAR02_08412 [Trichoderma harzianum]	658	658	100%	0	99.71	340
Trichoderma lentiforme	KAF3077685.1	Lipase 2 [Trichoderma lentiforme]	645	645	100%	0	97.08	343
Trichoderma harzianum CBS 226.95	XP_024777038.1	hypothetical protein M431DRAFT_135964 [Trichoderma harzianum CBS 226.95]	644	644	100%	0	97.65	339
Trichoderma harzianum	PKK42226.1	hypothetical protein CI102_12962 [Trichoderma harzianum]	642	642	100%	0	97.35	339
Trichoderma simmonsii	QYS94233.1	GPI inositol-deacylase [Trichoderma simmonsii]	637	637	100%	0	96.76	336
Trichoderma guizhouense	OPB43634.1	Triacylglycerol lipase [Trichoderma guizhouense]	635	635	100%	0	97.35	334
Trichoderma virens FT-333	UKZ73321.1	hypothetical protein TrVFT333_000966 [Trichoderma virens FT-333]	596	596	100%	0	88.92	337
Trichoderma virens Gv29-8	XP_013960763.1	hypothetical protein TRIVIDRAFT_59787 [Trichoderma virens Gv29-8]	594	594	100%	0	89.5	337
Trichoderma harzianum	PNP59423.1	hypothetical protein THARTR1_00913 [Trichoderma harzianum]	542	542	83%	0	96.11	284
Trichoderma asperellum CBS 433.97	XP_024756506.1	hypothetical protein M441DRAFT_30744 [Trichoderma asperellum CBS 433.97]	527	527	100%	0	78.55	335
Trichoderma arundinaceum	RFU75476.1	triacylglycerol lipase [Trichoderma arundinaceum]	525	525	92%	0	83.28	338
Trichoderma asperelloides	KAH8131048.1	Alpha/Beta hydrolase protein [Trichoderma asperelloides]	522	522	100%	0	77.68	335
Trichoderma semiorbis	KAH0532554.1	hypothetical protein TsFJ059_001229 [Trichoderma semiorbis]	521	521	81%	0	98.57	304
Trichoderma atroviride IMI 206040	XP_013943551.1	hypothetical protein TRIATDRAFT_221800 [Trichoderma atroviride IMI 206040]	521	521	92%	0	83.07	337
Trichoderma gracile	KAH0498535.1	hypothetical protein TgHK011_005787 [Trichoderma gracile]	520	520	100%	0	76.47	357
Trichoderma reesei QM6a	XP_006968245.1	uncharacterized protein TRIREDRAFT_67507 [Trichoderma reesei QM6a]	518	518	100%	0	76.75	355
Trichoderma longibrachiatum ATCC 18648	PTB78011.1	alpha/beta-hydrolase [Trichoderma longibrachiatum ATCC 18648]	510	510	100%	2.00E-180	75.93	349
Trichoderma gamsii	PNP38305.1	hypothetical protein TGAMA5MH_09878 [Trichoderma gamsii]	503	503	100%	2.00E-177	73.02	356
Trichoderma gamsii	XP_018663207.1	hypothetical protein TGAM01_v205034 [Trichoderma gamsii]	502	502	100%	3.00E-177	73.02	356
Trichoderma citrinoviride	XP_024753310.1	alpha/beta-hydrolase [Trichoderma citrinoviride]	496	496	100%	3.00E-175	75.72	330
Trichoderma cornu-damae	KAH6604852.1	triacylglycerol lipase [Trichoderma cornu-damae]	441	441	77%	2.00E-154	84.53	264
Hirsutella minnesotensis 3608	KJZ78693.1	hypothetical protein HIM_02084 [Hirsutella minnesotensis 3608]	427	427	92%	8.00E-148	66.67	354
Fusarium sp. AF-6	RSL54391.1	hypothetical protein CEP53_007467 [Fusarium sp. AF-6]	416	416	92%	2.00E-143	65.08	332
Fusarium solani	XP_046134414.1	Alpha/Beta hydrolase protein [Fusarium solani]	414	414	92%	9.00E-143	64.76	332
Fusarium kuroshium	RMJ16314.1	hypothetical protein CDV36_004026 [Fusarium kuroshium]	414	414	92%	9.00E-143	65.08	332
Fusarium solani-melongenae	UPL00669.1	hypothetical protein LCI18_011603 [Fusarium solani-melongenae]	414	414	92%	1.00E-142	64.76	332
Fusarium duplospermum	RSL70798.1	hypothetical protein CEP54_001584 [Fusarium duplospermum]	413	413	92%	3.00E-142	64.44	332
Fusarium vanettenii 77-13-4	XP_003050716.1	uncharacterized protein NECHADRAFT_60967 [Fusarium vanettenii 77-13-4]	412	412	92%	3.00E-142	64.44	332
Fusarium floridanum	RSL80024.1	hypothetical protein CEP51_006882 [Fusarium floridanum]	412	412	92%	4.00E-142	65.08	332
Fusarium ambrosium	RSM11997.1	hypothetical protein CDV31_006550 [Fusarium ambrosium]	410	410	89%	2.00E-141	65.79	332
Fusarium albosuccineum	KAF4468415.1	hypothetical protein FALBO_4707 [Fusarium albosuccineum]	410	410	92%	3.00E-141	63.61	352
Fusarium decemcellulare	KAF5011412.1	hypothetical protein FDECE_2475 [Fusarium decemcellulare]	410	410	92%	4.00E-141	63.92	352
Tolypocladium capitatum	PNY29418.1	Lipase 2 [Tolypocladium capitatum]	409	409	89%	2.00E-140	67.78	367
Fusarium sarcochroum	KAF4964785.1	hypothetical protein FSARC_7319 [Fusarium sarcochroum]	407	407	92%	4.00E-140	63.09	334
Stachybotrys chartarum IBT 7711	KEY69997.1	hypothetical protein S7711_04014 [Stachybotrys chartarum IBT 7711]	407	407	92%	6.00E-140	63.21	335
Stachybotrys chartarum IBT 40293	KFA50745.1	hypothetical protein S40293_06112 [Stachybotrys chartarum IBT 40293]	407	407	92%	6.00E-140	63.21	335
Fusarium flagelliforme	XP_045986929.1	Alpha/Beta hydrolase protein [Fusarium flagelliforme]	407	407	90%	7.00E-140	64.29	334
Stachybotrys chlorohalonata IBT 40285	KFA62815.1	hypothetical protein S40285_03805 [Stachybotrys chlorohalonata IBT 40285]	406	406	92%	1.00E-139	62.58	335
Ilyonectria destructans	KAH7011941.1	Alpha/Beta hydrolase protein [Ilyonectria destructans]	406	406	92%	1.00E-139	66.67	341
Thelonectria olida	KAH6899778.1	Alpha/Beta hydrolase protein [Thelonectria olida]	406	406	92%	2.00E-139	64.35	340
Fusarium sp. FIESC RH6	KAI1056250.1	hypothetical protein LB507_002622 [Fusarium sp. FIESC RH6]	405	405	90%	2.00E-139	63.96	338
Fusarium sporotrichioides	RGP72309.1	triacylglycerol lipase [Fusarium sporotrichioides]	405	405	90%	4.00E-139	63.64	351
Ilyonectria sp. MPI-CAGE-AT-0026	KAH6985660.1	Alpha/Beta hydrolase protein [Ilyonectria sp. MPI-CAGE-AT-0026]	404	404	92%	8.00E-139	66.35	341
Dactylonectria estremocensis	KAH7149692.1	Alpha/Beta hydrolase protein [Dactylonectria estremocensis]	404	404	92%	1.00E-138	64.47	341
Fusarium avenaceum	KAH6968652.1	Alpha/Beta hydrolase protein [Fusarium avenaceum]	403	403	90%	1.00E-138	64.29	334
Fusarium heterosporum	KAF5663380.1	triacylglycerol lipase [Fusarium heterosporum]	405	405	89%	2.00E-138	64.5	369
Fusarium avenaceum	KIL96274.1	triacylglycerol lipase [Fusarium avenaceum]	403	403	90%	2.00E-138	63.96	334
Fusarium avenaceum	KAG5656265.1	hypothetical protein KAF25_004541 [Fusarium avenaceum]	404	404	90%	2.00E-138	63.96	375
Drechmeria coniospora	ODA83100.1	hypothetical protein RJ55_01609 [Drechmeria coniospora]	403	403	91%	2.00E-138	62.89	346
Ilyonectria robusta	XP_046104990.1	Alpha/Beta hydrolase protein [Ilyonectria robusta]	403	403	92%	3.00E-138	66.04	341
Fusarium poae	XP_044713592.1	hypothetical protein FPOAC1_003104 [Fusarium poae]	402	402	90%	6.00E-138	62.99	334
Fusarium venenatum	XP_025590637.1	uncharacterized protein FVRRES_03432 [Fusarium venenatum]	401	401	90%	1.00E-137	62.46	334
Fusarium pseudograminearum	KAF0641638.1	hypothetical protein FPSE5266_04551 [Fusarium pseudograminearum]	401	401	89%	2.00E-137	62.87	351
Fusarium graminearum	CAG1993854.1	unnamed protein product [Fusarium graminearum]	401	401	89%	2.00E-137	62.87	351
Fusarium graminearum	PCD31638.1	hypothetical protein FGRA07_10181 [Fusarium graminearum]	401	401	89%	2.00E-137	62.87	351
Fusarium graminearum	CAF3606094.1	unnamed protein product [Fusarium graminearum]	401	401	89%	2.00E-137	62.87	351
Fusarium sp. MPI-SDFR-AT-0072	KAH7164412.1	Alpha/Beta hydrolase protein [Fusarium sp. MPI-SDFR-AT-0072]	402	402	92%	2.00E-137	61.83	367
Tolypocladium ophioglossoides CBS 100239	KND88898.1	Lipase 2 [Tolypocladium ophioglossoides CBS 100239]	401	401	89%	2.00E-137	69.16	343
Drechmeria coniospora	XP_040657415.1	triacylglycerol lipase [Drechmeria coniospora]	402	402	91%	2.00E-137	62.89	386
Fusarium oxysporum f. sp. rapae	KAG7414252.1	Lipase 2 [Fusarium oxysporum f. sp. rapae]	400	400	92%	2.00E-137	61.83	330
Fusarium graminearum	CZS78629.1	unnamed protein product [Fusarium graminearum]	400	400	89%	2.00E-137	62.87	334
Fusarium graminearum PH-1	XP_011318944.1	hypothetical protein FGSG_10020 [Fusarium graminearum PH-1]	400	400	89%	2.00E-137	62.87	334
Hirsutella rhossiliensis	XP_044725020.1	lipase [Hirsutella rhossiliensis]	400	400	89%	2.00E-137	67.21	320
Fusarium culmorum	QPC68571.1	hypothetical protein HYE67_010802 [Fusarium culmorum]	400	400	89%	3.00E-137	62.87	351
Fusarium redolens	XP_046051341.1	Alpha/Beta hydrolase protein [Fusarium redolens]	400	400	90%	3.00E-137	62.74	336
Fusarium longipes	RGP79158.1	triacylglycerol lipase [Fusarium longipes]	400	400	90%	3.00E-137	62.14	351
Tolypocladium paradoxum	POR38551.1	Lipase 2 [Tolypocladium paradoxum]	400	400	92%	5.00E-137	66.77	338
Mariannaea sp. PMI_226	KAI5462700.1	Alpha/Beta hydrolase protein [Mariannaea sp. PMI_226]	399	399	92%	7.00E-137	64.04	342
Fusarium tricinctum	KAH7262197.1	Alpha/Beta hydrolase protein [Fusarium tricinctum]	399	399	89%	7.00E-137	64.05	334
Clonostachys solani	CAH0059244.1	unnamed protein product [Clonostachys solani]	398	398	89%	1.00E-136	64.59	333
Fusarium austroafricanum	KAF4458007.1	triacylglycerol lipase [Fusarium austroafricanum]	399	399	90%	3.00E-136	62.66	364
Clonostachys rosea	VUC36940.1	unnamed protein product [Clonostachys rosea]	396	396	89%	1.00E-135	63.93	333
Ophiocordyceps sinensis CO18	EQK99704.1	triacylglycerol lipase [Ophiocordyceps sinensis CO18]	396	396	90%	2.00E-135	66.77	354
Dactylonectria macrodidyma	KAH7148923.1	Alpha/Beta hydrolase protein [Dactylonectria macrodidyma]	394	394	92%	6.00E-135	63.64	341
Pochonia chlamydosporia 170	XP_018148143.1	triacylglycerol lipase [Pochonia chlamydosporia 170]	392	392	89%	4.00E-134	64.82	330
Emericellopsis atlantica	XP_046114137.1	Alpha/Beta hydrolase protein [Emericellopsis atlantica]	392	392	91%	5.00E-134	63.34	335
Trichoderma atroviride	UKZ62414.1	hypothetical protein TrAtP1_003664 [Trichoderma atroviride]	389	389	72%	6.00E-134	80.16	272
Fusarium pseudograminearum CS3096	XP_009255944.1	hypothetical protein FPSE_04551 [Fusarium pseudograminearum CS3096]	389	389	89%	2.00E-132	59.02	371
Fusarium pseudograminearum	QPC77441.1	hypothetical protein HYE68_008193 [Fusarium pseudograminearum]	389	389	89%	2.00E-132	59.02	371
Epichloe festucae Fl1	QPG98063.1	hypothetical protein C2857_007204 [Epichloe festucae Fl1]	387	387	92%	2.00E-132	62.22	328
Fusarium mangiferae	XP_041681833.1	uncharacterized protein FMAN_07607 [Fusarium mangiferae]	387	387	90%	4.00E-132	63.31	330
Fusarium xylarioides	KAG5746670.1	hypothetical protein H9Q70_010636 [Fusarium xylarioides]	386	386	90%	9.00E-132	63.31	330
Ophiocordyceps unilateralis	PFH57814.1	hypothetical protein XA68_14543 [Ophiocordyceps unilateralis]	386	386	92%	1.00E-131	62.7	328
Fusarium proliferatum	CVL11341.1	related to TGL2-triacylglycerol lipase [Fusarium proliferatum]	385	385	90%	1.00E-131	63.31	330
Fusarium proliferatum ET1	XP_031083673.1	related to TGL2-triacylglycerol lipase [Fusarium proliferatum ET1]	385	385	90%	2.00E-131	62.99	330
Fusarium oxysporum NRRL 32931	XP_031039788.1	triacylglycerol lipase [Fusarium oxysporum NRRL 32931]	386	386	90%	3.00E-131	63.31	367
Clonostachys rosea f. rosea IK726	CAG9949609.1	unnamed protein product [Clonostachys rosea f. rosea IK726]	385	385	89%	3.00E-131	59.63	326
Colletotrichum incanum	KZL82863.1	triacylglycerol lipase [Colletotrichum incanum]	385	385	92%	4.00E-131	61.71	344
Acremonium chrysogenum ATCC 11550	KFH46845.1	Lipase-like protein [Acremonium chrysogenum ATCC 11550]	385	385	89%	4.00E-131	63.07	345
Fusarium fujikuroi	SCN78580.1	related to TGL2-triacylglycerol lipase [Fusarium fujikuroi]	384	384	90%	4.00E-131	62.99	330
Fusarium fujikuroi IMI 58289	XP_023430709.1	related to TGL2-triacylglycerol lipase [Fusarium fujikuroi IMI 58289]	384	384	90%	5.00E-131	62.99	330
Fusarium sp. NRRL 25303	KAF5626228.1	triacylglycerol lipase [Fusarium sp. NRRL 25303]	386	386	89%	7.00E-131	63.19	393
Clonostachys rhizophaga	CAH0026503.1	unnamed protein product [Clonostachys rhizophaga]	383	383	89%	9.00E-131	59.82	323
Fusarium pseudocircinatum	KAF5575212.1	triacylglycerol lipase [Fusarium pseudocircinatum]	384	384	90%	1.00E-130	62.99	353
Purpureocillium lilacinum	XP_018174914.1	triacylglycerol lipase [Purpureocillium lilacinum]	385	385	89%	1.00E-130	62.24	394
Fusarium verticillioides	RBQ71412.1	hypothetical protein FVER14953_02741 [Fusarium verticillioides]	383	383	90%	1.00E-130	62.66	330
Fusarium verticillioides 7600	XP_018746479.1	triacylglycerol lipase [Fusarium verticillioides 7600]	383	383	90%	2.00E-130	62.66	330
Fusarium oxysporum f. sp. lycopersici 4287	XP_018240630.1	triacylglycerol lipase [Fusarium oxysporum f. sp. lycopersici 4287]	382	382	90%	2.00E-130	62.99	330
Fusarium oxysporum f. sp. cepae	RKK20771.1	hypothetical protein BFJ65_g7466 [Fusarium oxysporum f. sp. cepae]	382	382	90%	3.00E-130	63.31	330
Colletotrichum simmondsii	KXH39849.1	triacylglycerol lipase [Colletotrichum simmondsii]	382	382	89%	3.00E-130	63.64	342
